# Supplementary material
Source: MDPI journal article supplement (https://www.mdpi.com/1424-2818/14/5/377)
Supplement: s1 [file s1]

## Supplementary materials

**Table S1.** Dataset of individuals successfully barcoded during the present work.

| Project Code | Process ID  | Field ID  | BIN          | Seq. Length | Specie name in BOLD               | Collection gears |
|--------------|-------------|-----------|--------------|-------------|-----------------------------------|------------------|
| COLOR        | COLOR001-15 | M0000_011 | BOLD:ABU8857 | 647[0n]     | Apogonidae                        | Light trap       |
| COLOR        | COLOR002-15 | M0000_021 | BOLD:AAF2723 | 650[0n]     | <i>Chrysiptera annulata</i>       | Light trap       |
| COLOR        | COLOR003-15 | M0101_011 | BOLD:ACV9601 | 646[0n]     | <i>Ostorhinchus</i>               | Light trap       |
| COLOR        | COLOR004-15 | M0101_021 | BOLD:AAB4091 | 650[0n]     | <i>Dascyllus abudafur</i>         | Light trap       |
| COLOR        | COLOR005-15 | M0101_031 | BOLD:AAC2084 | 647[0n]     | <i>Ostorhinchus</i>               | Light trap       |
| COLOR        | COLOR006-15 | M0101_041 | BOLD:ACV9383 | 584[0n]     | <i>Enneapterygius</i>             | Light trap       |
| COLOR        | COLOR008-15 | M0101_061 | BOLD:AAC7599 | 647[1n]     | <i>Parapriacanthus</i>            | Light trap       |
| COLOR        | COLOR009-15 | M0101_071 | BOLD:AAB2685 | 647[0n]     | <i>Dascyllus trimaculatus</i>     | Light trap       |
| COLOR        | COLOR010-15 | M0101_072 | BOLD:AAB2685 | 647[0n]     | <i>Dascyllus trimaculatus</i>     | Light trap       |
| COLOR        | COLOR011-15 | M0101_081 | BOLD:AAB2685 | 647[0n]     | <i>Dascyllus trimaculatus</i>     | Light trap       |
| COLOR        | COLOR012-15 | M0101_091 | BOLD:AAC2084 | 647[0n]     | <i>Ostorhinchus</i>               | Light trap       |
| COLOR        | COLOR013-15 | M0101_101 | BOLD:AAF2723 | 647[0n]     | <i>Chrysiptera annulata</i>       | Light trap       |
| COLOR        | COLOR014-15 | M0101_102 | BOLD:AAY3550 | 650[0n]     | <i>Pomacentrus trilineatus</i>    | Light trap       |
| COLOR        | COLOR015-15 | M0101_111 | BOLD:AAB6988 | 650[0n]     | <i>Plectroglyphidodon</i>         | Light trap       |
| COLOR        | COLOR017-15 | M0101_122 | BOLD:AAB4985 | 650[0n]     | <i>Chromis viridis</i>            | Light trap       |
| COLOR        | COLOR018-15 | M0101_131 | BOLD:AAD8454 | 647[0n]     | <i>Ostorhinchus</i>               | Light trap       |
| COLOR        | COLOR019-15 | M0101_141 | BOLD:AAB0511 | 650[0n]     | <i>Lethrinus</i> BOLDAAB0511      | Light trap       |
| COLOR        | COLOR020-15 | M0101_151 | BOLD:ABU8857 | 647[0n]     | <i>Apogonichthys perdix</i>       | Light trap       |
| COLOR        | COLOR021-15 | M0101_161 | BOLD:ACV6948 | 647[0n]     | Apogonidae                        | Light trap       |
| COLOR        | COLOR022-15 | M0101_171 | BOLD:AAJ8751 | 647[0n]     | <i>Apogon</i>                     | Light trap       |
| COLOR        | COLOR023-15 | M0101_181 | BOLD:ACV9601 | 647[0n]     | <i>Ostorhinchus</i>               | Light trap       |
| COLOR        | COLOR024-15 | M0101_191 | BOLD:AAF8427 | 633[0n]     | <i>Apogon</i>                     | Light trap       |
| COLOR        | COLOR025-15 | M0101_201 | BOLD:AAF2723 | 650[0n]     | <i>Chrysiptera annulata</i>       | Light trap       |
| COLOR        | COLOR026-15 | M0101_211 | BOLD:AAF8427 | 647[0n]     | <i>Apogon</i>                     | Light trap       |
| COLOR        | COLOR027-15 | M0101_221 | BOLD:AAJ1254 | 647[0n]     | <i>Ostorhinchus flagelliferus</i> | Light trap       |
| COLOR        | COLOR028-15 | M0101_231 | BOLD:AAI8860 | 650[0n]     | <i>Corythoichthys</i> sp.         | Light trap       |
| COLOR        | COLOR030-15 | M0201_011 | BOLD:AAE4046 | 634[0n]     | <i>Acanthurus dussumieri</i>      | Light trap       |
| COLOR        | COLOR032-15 | M0201_031 | BOLD:AAY3550 | 635[0n]     | <i>Pomacentrus trilineatus</i>    | Light trap       |
| COLOR        | COLOR033-15 | M0201_041 | BOLD:ACV9601 | 635[0n]     | <i>Ostorhinchus</i>               | Light trap       |
| COLOR        | COLOR034-15 | M0201_051 | BOLD:AAB9564 | 635[0n]     | <i>Cantherhines pardalis</i>      | Light trap       |
| COLOR        | COLOR036-15 | M0201_071 | BOLD:AAB6438 | 626[0n]     | <i>Lethrinus mahsena</i>          | Light trap       |
| COLOR        | COLOR037-15 | M0201_081 | BOLD:AAA9822 | 635[0n]     | <i>Epinephelus areolatus</i>      | Light trap       |
| COLOR        | COLOR038-15 | M0201_091 | BOLD:AAB3276 | 635[0n]     | <i>Lutjanus gibbus</i>            | Light trap       |
| COLOR        | COLOR039-15 | M0201_101 | BOLD:AAA6100 | 635[0n]     | <i>Sphyræna barracuda</i>         | Light trap       |
| COLOR        | COLOR040-15 | M0201_111 | BOLD:ADF5681 | 635[0n]     | <i>Lutjanus fulviflamma</i>       | Light trap       |
| COLOR        | COLOR041-15 | M0201_121 | BOLD:AAD5116 | 659[0n]     | <i>Ostorhinchus angustatus</i>    | Light trap       |
| COLOR        | COLOR043-15 | M0201_141 | BOLD:AAE4046 | 635[0n]     | <i>Acanthurus dussumieri</i>      | Light trap       |
| COLOR        | COLOR044-15 | M0201_142 | BOLD:AAE4046 | 650[0n]     | <i>Acanthurus dussumieri</i>      | Light trap       |
| COLOR        | COLOR046-15 | M0201_152 | BOLD:AAD3872 | 635[0n]     | <i>Chaetodon guttatissimus</i>    | Light trap       |

|       |             |            |              |         |                                       |            |
|-------|-------------|------------|--------------|---------|---------------------------------------|------------|
| COLOR | COLOR048-15 | M0201_162  | BOLD:AAC6218 | 635[0n] | <i>Canthigaster bennetti</i>          | Light trap |
| COLOR | COLOR049-15 | M0201_171  | BOLD:AAF2723 | 633[0n] | <i>Chrysiptera annulata</i>           | Light trap |
| COLOR | COLOR050-15 | M0201_181  | BOLD:AAB2685 | 635[0n] | <i>Dascyllus trimaculatus</i>         | Light trap |
| COLOR | COLOR051-15 | M0201_191  | BOLD:AAB4985 | 635[0n] | <i>Chromis viridis</i>                | Light trap |
| COLOR | COLOR053-15 | M0201_211  | BOLD:AAE4046 | 635[0n] | <i>Acanthurus dussumieri</i>          | Light trap |
| COLOR | COLOR056-15 | M0201_241  | BOLD:AAF0628 | 635[0n] | <i>Corythoichthys haematopterus</i>   | Light trap |
| COLOR | COLOR058-15 | M0201_251a | BOLD:AAF0628 | 650[1n] | <i>Corythoichthys haematopterus</i>   | Light trap |
| COLOR | COLOR060-15 | M0201_253  | BOLD:AAF0628 | 650[1n] | <i>Corythoichthys haematopterus</i>   | Light trap |
| COLOR | COLOR062-15 | M0201_281  | BOLD:AAB6438 | 635[0n] | <i>Lethrinus mahsena</i>              | Light trap |
| COLOR | COLOR063-15 | M0201_291  | BOLD:ACZ6203 | 634[0n] | <i>Pseudobalistes fuscus</i>          | Light trap |
| COLOR | COLOR064-15 | M0201_301  | BOLD:ACZ6203 | 635[0n] | <i>Pseudobalistes fuscus</i>          | Light trap |
| COLOR | COLOR065-15 | M0202_011  | BOLD:ACZ6203 | 650[0n] | <i>Pseudobalistes fuscus</i>          | Light trap |
| COLOR | COLOR066-15 | M0202_021  | BOLD:AAB9166 | 650[0n] | <i>Ctenochaetus binotatus</i>         | Light trap |
| COLOR | COLOR067-15 | M0202_031  | BOLD:AAF8808 | 647[0n] | <i>Crossorhombus valderostratus</i>   | Light trap |
| COLOR | COLOR068-15 | M0202_041  | BOLD:AAU3299 | 647[0n] | <i>Pseudochromis madagascariensis</i> | Light trap |
| COLOR | COLOR070-15 | M0202_061  | BOLD:AAI8860 | 650[0n] | <i>Corythoichthys</i> sp.             | Light trap |
| COLOR | COLOR071-15 | M0202_071  | BOLD:ACV6948 | 647[0n] | Apogonidae                            | Light trap |
| COLOR | COLOR072-15 | M0202_081  | BOLD:ACF1984 | 633[0n] | <i>Amblyglyphidodon indicus</i>       | Light trap |
| COLOR | COLOR073-15 | M0202_091  | BOLD:AAF8820 | 647[0n] | <i>Pempheris</i>                      | Light trap |
| COLOR | COLOR075-15 | M0202_111  | BOLD:AAJ1709 | 647[0n] | <i>Ariosoma scheelei</i>              | Light trap |
| COLOR | COLOR078-15 | M0202_141  | BOLD:ACC5690 | 646[0n] | Apogonidae                            | Light trap |
| COLOR | COLOR079-15 | M0202_151  | BOLD:AAY3550 | 650[0n] | <i>Pomacentrus trilineatus</i>        | Light trap |
| COLOR | COLOR081-15 | M0202_171  | BOLD:ACV9758 | 644[0n] | <i>Hypoatherina</i>                   | Light trap |
| COLOR | COLOR082-15 | M0202_181  | BOLD:AAI8860 | 650[0n] | <i>Corythoichthys</i> sp.             | Light trap |
| COLOR | COLOR083-15 | M0202_191  | BOLD:AAU3299 | 634[0n] | <i>Pseudochromis madagascariensis</i> | Light trap |
| COLOR | COLOR084-15 | M0202_192  | BOLD:AAU3299 | 635[0n] | <i>Pseudochromis madagascariensis</i> | Light trap |
| COLOR | COLOR085-15 | M0202_201  | BOLD:AAC4543 | 638[5n] | <i>Sebastapistes</i>                  | Light trap |
| COLOR | COLOR086-15 | M0202_211  | BOLD:ACV9601 | 647[1n] | <i>Ostorhinchus</i>                   | Light trap |
| COLOR | COLOR087-15 | M0202_221  | BOLD:AAY3550 | 635[0n] | <i>Pomacentrus trilineatus</i>        | Light trap |
| COLOR | COLOR089-15 | M0202_241  | BOLD:AAB0511 | 645[0n] | <i>Lethrinus</i> BOLDAAB0511          | Light trap |
| COLOR | COLOR091-15 | M0202_251  | BOLD:AAB0511 | 647[0n] | <i>Lethrinus</i> BOLDAAB0511          | Light trap |
| COLOR | COLOR092-15 | M0202_252  | BOLD:AAB0511 | 646[0n] | <i>Lethrinus</i> BOLDAAB0511          | Light trap |
| COLOR | COLOR094-15 | M0202_261  | BOLD:ACF0223 | 647[0n] | <i>Parupeneus macronemus</i>          | Light trap |
| COLOR | COLOR096-15 | M0202_272  | BOLD:AAB8858 | 646[0n] | <i>Epibulus insidiator</i>            | Light trap |
| COLOR | COLOR098-15 | M0202_282  | BOLD:AAE4046 | 650[0n] | <i>Acanthurus dussumieri</i>          | Light trap |
| COLOR | COLOR099-15 | M0202_283  | BOLD:AAB8729 | 635[0n] | <i>Acanthurus nigricauda</i>          | Light trap |
| COLOR | COLOR100-15 | M0202_291  | BOLD:AAA9362 | 646[0n] | <i>Acanthurus triostegus</i>          | Light trap |
| COLOR | COLOR102-15 | M0202_302  | BOLD:AAI5395 | 638[1n] | <i>Gnatholepis</i>                    | Light trap |
| COLOR | COLOR103-15 | M0202_311  | BOLD:AAC4543 | 650[0n] | <i>Sebastapistes</i>                  | Light trap |
| COLOR | COLOR104-15 | M0202_321  | BOLD:ACZ6203 | 635[0n] | <i>Pseudobalistes fuscus</i>          | Light trap |
| COLOR | COLOR105-15 | M0202_331  | BOLD:AAT9889 | 635[0n] | <i>Enneapterygius</i>                 | Light trap |
| COLOR | COLOR106-15 | M0202_341  | BOLD:AAY3550 | 650[0n] | <i>Pomacentrus trilineatus</i>        | Light trap |

|       |             |           |              |         |                                        |            |
|-------|-------------|-----------|--------------|---------|----------------------------------------|------------|
| COLOR | COLOR107-15 | M0203_011 | BOLD:ACV7999 | 647[0n] | Clupeidae                              | Light trap |
| COLOR | COLOR109-15 | M0203_031 | BOLD:AAB0584 | 647[0n] | <i>Caranx sexfasciatus</i>             | Light trap |
| COLOR | COLOR110-15 | M0203_041 | BOLD:AAY3550 | 650[0n] | <i>Pomacentrus trilineatus</i>         | Light trap |
| COLOR | COLOR113-15 | M0203_071 | BOLD:AAB9539 | 645[0n] | <i>Pomacentrus</i>                     | Light trap |
| COLOR | COLOR114-15 | M0203_081 | BOLD:ABU8857 | 647[0n] | Apogonidae                             | Light trap |
| COLOR | COLOR116-15 | M0203_101 | BOLD:AAA6100 | 617[0n] | <i>Sphyræna barracuda</i>              | Light trap |
| COLOR | COLOR117-15 | M0203_111 | BOLD:AAC8278 | 638[0n] | <i>Neoniphon</i>                       | Light trap |
| COLOR | COLOR118-15 | M0203_121 | BOLD:ACF0042 | 647[0n] | <i>Chromis</i>                         | Light trap |
| COLOR | COLOR119-15 | M0203_131 | BOLD:AAD8726 | 645[0n] | <i>Fowleria</i>                        | Light trap |
| COLOR | COLOR120-15 | M0203_141 | BOLD:ACV6948 | 645[0n] | Apogonidae                             | Light trap |
| COLOR | COLOR121-15 | M0203_151 | BOLD:AAD8454 | 611[0n] | <i>Ostorhinchus</i>                    | Light trap |
| COLOR | COLOR124-15 | M0203_181 | BOLD:AAL9262 | 615[0n] | <i>Nectamia</i>                        | Light trap |
| COLOR | COLOR125-15 | M0203_191 | BOLD:AAB2685 | 632[0n] | <i>Dascyllus trimaculatus</i>          | Light trap |
| COLOR | COLOR126-15 | M0301_011 | BOLD:AAE7640 | 634[0n] | <i>Carangoides ferdau</i>              | Light trap |
| COLOR | COLOR128-15 | M0301_031 | BOLD:AAC2887 | 633[0n] | <i>Herklotsichthys quadrimaculatus</i> | Light trap |
| COLOR | COLOR129-15 | M0301_041 | BOLD:ACV9758 | 618[0n] | <i>Hypoatherina</i>                    | Light trap |
| COLOR | COLOR130-15 | M0301_051 | BOLD:AAC2084 | 647[0n] | <i>Ostorhinchus</i>                    | Light trap |
| COLOR | COLOR131-15 | M0301_061 | BOLD:AAD5116 | 636[0n] | <i>Ostorhinchus angustatus</i>         | Light trap |
| COLOR | COLOR132-15 | M0301_071 | BOLD:AAB0511 | 592[0n] | <i>Lethrinus</i> BOLDAAB0511           | Light trap |
| COLOR | COLOR133-15 | M0301_081 | BOLD:AAB6438 | 632[0n] | <i>Lethrinus mahsena</i>               | Light trap |
| COLOR | COLOR134-15 | M0301_091 | BOLD:AAC0458 | 632[0n] | <i>Chromis fieldi</i>                  | Light trap |
| COLOR | COLOR135-15 | M0301_101 | BOLD:AAY3550 | 645[0n] | <i>Pomacentrus trilineatus</i>         | Light trap |
| COLOR | COLOR136-15 | M0301_111 | BOLD:AAD0579 | 639[0n] | <i>Hyporhamphus affinis</i>            | Light trap |
| COLOR | COLOR137-15 | M0301_121 | BOLD:AAB4823 | 645[1n] | <i>Caesio</i>                          | Light trap |
| COLOR | COLOR138-15 | M0301_131 | BOLD:AAB2685 | 614[0n] | <i>Dascyllus trimaculatus</i>          | Light trap |
| COLOR | COLOR139-15 | M0301_141 | BOLD:ACD1807 | 619[0n] | <i>Synodus</i>                         | Light trap |
| COLOR | COLOR140-15 | M0301_151 | BOLD:AAC7599 | 635[0n] | <i>Parapriacanthus</i>                 | Light trap |
| COLOR | COLOR141-15 | M0301_161 | BOLD:AAB6988 | 634[0n] | <i>Plectroglyphidodon</i>              | Light trap |
| COLOR | COLOR142-15 | M0301_171 | BOLD:ACC5690 | 638[0n] | Apogonidae                             | Light trap |
| COLOR | COLOR143-15 | M0301_181 | BOLD:AAB4091 | 635[0n] | <i>Dascyllus abudafur</i>              | Light trap |
| COLOR | COLOR146-15 | M0301_211 | BOLD:AAD8726 | 635[0n] | <i>Fowleria</i>                        | Light trap |
| COLOR | COLOR148-15 | M0301_231 | BOLD:AAD4824 | 615[0n] | <i>Stethojulis</i>                     | Light trap |
| COLOR | COLOR150-15 | M0301_251 | BOLD:AAB3276 | 615[0n] | <i>Lutjanus gibbus</i>                 | Light trap |
| COLOR | COLOR151-15 | M0302_011 | BOLD:AAB4823 | 644[1n] | <i>Caesio</i>                          | Light trap |
| COLOR | COLOR152-15 | M0302_021 | BOLD:AAC1635 | 631[0n] | <i>Naso brevirostris</i>               | Light trap |
| COLOR | COLOR153-15 | M0302_031 | BOLD:ACK8181 | 605[0n] | <i>Pomacanthus semicirculatus</i>      | Light trap |
| COLOR | COLOR154-15 | M0302_041 | BOLD:AAC6467 | 638[0n] | <i>Acanthurus xanthopterus</i>         | Light trap |
| COLOR | COLOR155-15 | M0302_051 | BOLD:AAC6218 | 621[0n] | <i>Canthigaster bennetti</i>           | Light trap |
| COLOR | COLOR156-15 | M0302_061 | BOLD:ACC1190 | 592[0n] | <i>Canthigaster</i>                    | Light trap |
| COLOR | COLOR157-15 | M0302_071 | BOLD:AAE4046 | 635[0n] | <i>Acanthurus dussumieri</i>           | Light trap |
| COLOR | COLOR158-15 | M0302_081 | BOLD:AAB6556 | 609[0n] | <i>Siganus sutor</i>                   | Light trap |
| COLOR | COLOR159-15 | M0302_091 | BOLD:AAB4823 | 615[1n] | <i>Caesio</i>                          | Light trap |
| COLOR | COLOR160-15 | M0302_101 | BOLD:AAC7599 | 587[2n] | <i>Parapriacanthus</i>                 | Light trap |
| COLOR | COLOR161-15 | M0302_111 | BOLD:AAB8729 | 635[0n] | <i>Acanthurus nigricauda</i>           | Light trap |

|       |             |           |              |         |                                     |            |
|-------|-------------|-----------|--------------|---------|-------------------------------------|------------|
| COLOR | COLOR164-15 | M0302_141 | BOLD:AAC6467 | 635[0n] | <i>Acanthurus xanthopterus</i>      | Light trap |
| COLOR | COLOR165-15 | M0302_151 | BOLD:AAB2988 | 635[0n] | <i>Lactoria cornuta</i>             | Light trap |
| COLOR | COLOR167-15 | M0302_171 | BOLD:AAA5277 | 635[0n] | <i>Coryphaena hippurus</i>          | Light trap |
| COLOR | COLOR168-15 | M0302_181 | BOLD:ACY6212 | 635[0n] | Platycephalidae                     | Light trap |
| COLOR | COLOR169-15 | M0302_191 | BOLD:ACY8539 | 635[0n] | Apogonidae                          | Light trap |
| COLOR | COLOR170-15 | M0302_201 | BOLD:AAB6438 | 635[0n] | <i>Lethrinus mahsena</i>            | Light trap |
| COLOR | COLOR172-15 | M0302_221 | BOLD:ACW9154 | 635[0n] | <i>Apogon</i>                       | Light trap |
| COLOR | COLOR173-15 | M0302_231 | BOLD:AAC1521 | 617[0n] | <i>Lethrinus</i>                    | Light trap |
| COLOR | COLOR174-15 | M0302_241 | BOLD:AAC6467 | 635[0n] | <i>Acanthurus xanthopterus</i>      | Light trap |
| COLOR | COLOR175-15 | M0302_251 | BOLD:AAC2848 | 609[1n] | <i>Chaetodon melannotus</i>         | Light trap |
| COLOR | COLOR178-15 | M0302_281 | BOLD:AAB6988 | 647[1n] | <i>Plectroglyphidodon</i>           | Light trap |
| COLOR | COLOR179-15 | M0302_291 | BOLD:AAB6234 | 647[0n] | <i>Chrysiptera brownriggii</i>      | Light trap |
| COLOR | COLOR180-15 | M0302_301 | BOLD:AAY3550 | 646[0n] | <i>Pomacentrus trilineatus</i>      | Light trap |
| COLOR | COLOR181-15 | M0302_311 | BOLD:ABU8857 | 592[0n] | Apogonidae                          | Light trap |
| COLOR | COLOR182-15 | M0302_321 | BOLD:AAI4531 | 598[5n] | <i>Pseudalutarius</i>               | Light trap |
| COLOR | COLOR186-15 | M0302_361 | BOLD:AAE4046 | 632[0n] | <i>Acanthurus dussumieri</i>        | Light trap |
| COLOR | COLOR187-15 | M0302_371 | BOLD:AAB6438 | 634[0n] | <i>Lethrinus mahsena</i>            | Light trap |
| COLOR | COLOR188-15 | M0302_381 | BOLD:AAB0511 | 647[2n] | <i>Lethrinus</i> BOLDAAB0511        | Light trap |
| COLOR | COLOR189-15 | M0302_391 | BOLD:AAB0511 | 560[0n] | <i>Lethrinus</i> BOLDAAB0511        | Light trap |
| COLOR | COLOR190-15 | M0303_011 | BOLD:AAI8860 | 617[0n] | <i>Corythoichthys</i> sp.           | Light trap |
| COLOR | COLOR191-15 | M0303_021 | BOLD:AAF0628 | 650[1n] | <i>Corythoichthys haematopterus</i> | Light trap |
| COLOR | COLOR193-15 | M0303_041 | BOLD:AAD2206 | 566[0n] | <i>Apogon</i>                       | Light trap |
| COLOR | COLOR195-15 | M0303_061 | BOLD:ACV9601 | 615[0n] | <i>Ostorhinchus</i>                 | Light trap |
| COLOR | COLOR196-15 | M0303_071 | BOLD:AAF8427 | 590[0n] | <i>Apogon</i>                       | Light trap |
| COLOR | COLOR197-15 | M0303_081 | BOLD:AAC6972 | 642[0n] | <i>Chromis ternatensis</i>          | Light trap |
| COLOR | COLOR198-15 | M0303_091 | BOLD:AAB9539 | 610[0n] | <i>Pomacentrus</i>                  | Light trap |
| COLOR | COLOR199-15 | M0303_101 | BOLD:AAB4091 | 529[0n] | <i>Dascyllus abudafur</i>           | Light trap |
| COLOR | COLOR200-15 | M0303_111 | BOLD:AAF2723 | 633[0n] | <i>Chrysiptera annulata</i>         | Light trap |
| COLOR | COLOR203-15 | M0303_141 | BOLD:AAY3550 | 630[0n] | <i>Pomacentrus trilineatus</i>      | Light trap |
| COLOR | COLOR204-15 | M0303_151 | BOLD:ACV6948 | 591[0n] | Apogonidae                          | Light trap |
| COLOR | COLOR205-15 | M0303_161 | BOLD:AAE6131 | 618[0n] | <i>Petroscirtes</i>                 | Light trap |
| COLOR | COLOR207-15 | M0303_181 | BOLD:AAC4543 | 635[0n] | <i>Sebastapistes</i>                | Light trap |
| COLOR | COLOR208-15 | M0303_191 | BOLD:AAA6100 | 635[0n] | <i>Sphyaena barracuda</i>           | Light trap |
| COLOR | COLOR209-15 | M0303_201 | BOLD:AAD2857 | 657[0n] | <i>Arothron immaculatus</i>         | Light trap |
| COLOR | COLOR210-15 | M0303_202 | BOLD:AAB9202 | 611[0n] | <i>Arothron hispidus</i>            | Light trap |
| COLOR | COLOR211-15 | M0303_211 | BOLD:AAB6556 | 611[0n] | <i>Siganus sutor</i>                | Light trap |
| COLOR | COLOR212-15 | M0303_221 | BOLD:AAD2952 | 545[0n] | <i>Pomacentrus sulfureus</i>        | Light trap |
| COLOR | COLOR213-15 | M0303_231 | BOLD:AAY3550 | 646[0n] | <i>Pomacentrus trilineatus</i>      | Light trap |
| COLOR | COLOR214-15 | M0303_241 | BOLD:AAB4985 | 623[0n] | <i>Chromis viridis</i>              | Light trap |
| COLOR | COLOR215-15 | M0303_251 | BOLD:AAC6467 | 634[0n] | <i>Acanthurus xanthopterus</i>      | Light trap |
| COLOR | COLOR217-15 | M0401_021 | BOLD:AAC4501 | 611[0n] | <i>Megalops cyprinoides</i>         | Light trap |
| COLOR | COLOR219-15 | M0401_041 | BOLD:AAB0511 | 611[0n] | <i>Lethrinus</i> BOLDAAB0511        | Light trap |
| COLOR | COLOR220-15 | M0401_051 | BOLD:AAB8394 | 611[0n] | <i>Zoramia</i>                      | Light trap |
| COLOR | COLOR222-15 | M0401_071 | BOLD:AAC4543 | 611[0n] | <i>Sebastapistes</i>                | Light trap |

|       |             |           |              |         |                                   |            |
|-------|-------------|-----------|--------------|---------|-----------------------------------|------------|
| COLOR | COLOR223-15 | M0401_081 | BOLD:ACZ1215 | 610[4n] | <i>Callionymus filamentosus</i>   | Light trap |
| COLOR | COLOR224-15 | M0401_091 | BOLD:AAD8726 | 611[0n] | <i>Fowleria</i>                   | Light trap |
| COLOR | COLOR225-15 | M0401_101 | BOLD:ACD1807 | 611[0n] | <i>Synodus</i>                    | Light trap |
| COLOR | COLOR226-15 | M0401_111 | BOLD:ABU8857 | 610[1n] | Apogonidae                        | Light trap |
| COLOR | COLOR227-15 | M0401_121 | BOLD:AAB8394 | 611[0n] | <i>Zoramia</i>                    | Light trap |
| COLOR | COLOR228-15 | M0401_131 | BOLD:ACV7958 | 611[0n] | Congridae                         | Light trap |
| COLOR | COLOR230-15 | M0401_151 | BOLD:ACV9716 | 611[0n] | <i>Sphyaena</i>                   | Light trap |
| COLOR | COLOR231-15 | M0401_161 | BOLD:AAB2590 | 611[0n] | <i>Parupeneus</i>                 | Light trap |
| COLOR | COLOR232-15 | M0401_171 | BOLD:AAB5978 | 611[0n] | <i>Parupeneus</i>                 | Light trap |
| COLOR | COLOR233-15 | M0401_181 | BOLD:AAB4823 | 610[2n] | <i>Caesio</i>                     | Light trap |
| COLOR | COLOR235-15 | M0401_201 | BOLD:AAD7114 | 611[0n] | <i>Dascyllus carneus</i>          | Light trap |
| COLOR | COLOR236-15 | M0401_211 | BOLD:AAF7731 | 610[0n] | <i>Lutjanus notatus</i>           | Light trap |
| COLOR | COLOR238-15 | M0401_231 | BOLD:AAD8726 | 611[0n] | <i>Fowleria</i>                   | Light trap |
| COLOR | COLOR239-15 | M0401_241 | BOLD:AAB8729 | 593[0n] | <i>Acanthurus nigricauda</i>      | Light trap |
| COLOR | COLOR240-15 | M0401_251 | BOLD:AAB3788 | 635[0n] | <i>Zebrasoma scopas</i>           | Light trap |
| COLOR | COLOR241-15 | M0401_261 | BOLD:AAC1635 | 635[0n] | <i>Naso brevirostris</i>          | Light trap |
| COLOR | COLOR242-15 | M0401_271 | BOLD:AAC8278 | 635[0n] | <i>Neoniphon</i>                  | Light trap |
| COLOR | COLOR243-15 | M0401_281 | BOLD:AAD0474 | 635[0n] | <i>Balistoides viridescens</i>    | Light trap |
| COLOR | COLOR244-15 | M0401_291 | BOLD:AAB9202 | 611[0n] | <i>Arothron hispidus</i>          | Light trap |
| COLOR | COLOR245-15 | M0401_301 | BOLD:AAL9262 | 611[0n] | <i>Nectamia</i>                   | Light trap |
| COLOR | COLOR246-15 | M0401_311 | BOLD:ACV9601 | 611[0n] | <i>Ostorhinchus</i>               | Light trap |
| COLOR | COLOR247-15 | M0401_321 | BOLD:AAB9018 | 635[0n] | <i>Chromis atripectoralis</i>     | Light trap |
| COLOR | COLOR248-15 | M0401_331 | BOLD:ACE8647 | 611[0n] | <i>Chaetodon bennetti</i>         | Light trap |
| COLOR | COLOR249-15 | M0401_341 | BOLD:AAB7462 | 611[0n] | <i>Gnathanodon speciosus</i>      | Light trap |
| COLOR | COLOR250-15 | M0401_351 | BOLD:AAC2848 | 611[0n] | <i>Chaetodon melannotus</i>       | Light trap |
| COLOR | COLOR251-15 | M0401_361 | BOLD:AAB3276 | 611[0n] | <i>Lutjanus gibbus</i>            | Light trap |
| COLOR | COLOR252-15 | M0401_371 | BOLD:AAB8394 | 611[0n] | <i>Zoramia</i>                    | Light trap |
| COLOR | COLOR254-15 | M0401_391 | BOLD:AAL9262 | 611[0n] | <i>Nectamia</i>                   | Light trap |
| COLOR | COLOR255-15 | M0401_401 | BOLD:ACV7965 | 610[0n] | <i>Salarias</i>                   | Light trap |
| COLOR | COLOR256-15 | M0401_411 | BOLD:AAB3424 | 626[0n] | <i>Sargocentron diadema</i>       | Light trap |
| COLOR | COLOR257-15 | M0401_421 | BOLD:AAD0579 | 611[0n] | <i>Hyporhamphus affinis</i>       | Light trap |
| COLOR | COLOR258-15 | M0401_431 | BOLD:AAE1213 | 589[0n] | <i>Chaetodon xanthocephalus</i>   | Light trap |
| COLOR | COLOR259-15 | M0401_441 | BOLD:AAD2222 | 611[0n] | <i>Canthigaster</i>               | Light trap |
| COLOR | COLOR260-15 | M0401_451 | BOLD:AAB5966 | 611[0n] | <i>Dactyloptena</i>               | Light trap |
| COLOR | COLOR261-15 | M0402_011 | BOLD:ACV9382 | 611[0n] | Gobiidae                          | Light trap |
| COLOR | COLOR262-15 | M0402_021 | BOLD:AAC4543 | 635[0n] | <i>Sebastapistes</i>              | Light trap |
| COLOR | COLOR263-15 | M0402_031 | BOLD:AAB7311 | 611[3n] | <i>Polydactylus malagasyensis</i> | Light trap |
| COLOR | COLOR266-15 | M0402_061 | BOLD:ACV7999 | 611[0n] | Clupeidae                         | Light trap |
| COLOR | COLOR268-15 | M0402_081 | BOLD:AAC6467 | 606[0n] | <i>Acanthurus xanthopterus</i>    | Light trap |
| COLOR | COLOR270-15 | M0402_101 | BOLD:AAC1406 | 611[0n] | <i>Upeneus pori</i>               | Light trap |
| COLOR | COLOR271-15 | M0402_111 | BOLD:AAB5978 | 611[0n] | <i>Parupeneus</i>                 | Light trap |
| COLOR | COLOR272-15 | M0402_121 | BOLD:AAY3550 | 632[0n] | <i>Pomacentrus trilineatus</i>    | Light trap |
| COLOR | COLOR273-15 | M0402_131 | BOLD:ACV7471 | 611[0n] | <i>Eleotris</i>                   | Light trap |
| COLOR | COLOR274-15 | M0402_141 | BOLD:AAB3424 | 614[0n] | <i>Sargocentron diadema</i>       | Light trap |

|       |             |           |              |         |                                |            |
|-------|-------------|-----------|--------------|---------|--------------------------------|------------|
| COLOR | COLOR275-15 | M0402_151 | BOLD:AAB3424 | 587[0n] | <i>Sargocentron diadema</i>    | Light trap |
| COLOR | COLOR276-15 | M0402_161 | BOLD:AAB2590 | 594[0n] | <i>Parupeneus</i>              | Light trap |
| COLOR | COLOR277-15 | M0402_171 | BOLD:ACF0223 | 611[0n] | <i>Parupeneus macronemus</i>   | Light trap |
| COLOR | COLOR278-15 | M0402_181 | BOLD:AAC1406 | 589[0n] | <i>Upeneus pori</i>            | Light trap |
| COLOR | COLOR279-15 | M0402_191 | BOLD:AAD7114 | 611[0n] | <i>Dascyllus carneus</i>       | Light trap |
| COLOR | COLOR280-15 | M0402_201 | BOLD:AAA9362 | 657[0n] | <i>Acanthurus triostegus</i>   | Light trap |
| COLOR | COLOR284-15 | M0403_041 | BOLD:AAB5992 | 611[1n] | <i>Fistularia commersonii</i>  | Light trap |
| COLOR | COLOR285-15 | M0501_011 | BOLD:AAA9578 | 611[0n] | <i>Trachinocephalus myops</i>  | Light trap |
| COLOR | COLOR286-15 | M0501_021 | BOLD:AAF8820 | 651[0n] | <i>Pempheris</i>               | Light trap |
| COLOR | COLOR287-15 | M0501_031 | BOLD:AAC6467 | 635[0n] | <i>Acanthurus xanthopterus</i> | Light trap |
| COLOR | COLOR289-15 | M0501_051 | BOLD:ACV8977 | 611[0n] | <i>Terapon</i> sp.             | Light trap |
| COLOR | COLOR290-15 | M0501_061 | BOLD:AAB3382 | 611[0n] | <i>Atule</i>                   | Light trap |
| COLOR | COLOR292-15 | M0501_081 | BOLD:AAB3424 | 617[0n] | <i>Sargocentron diadema</i>    | Light trap |
| COLOR | COLOR293-15 | M0501_091 | BOLD:AAB9202 | 587[0n] | <i>Arothron hispidus</i>       | Light trap |
| COLOR | COLOR294-15 | M0501_101 | BOLD:AAB9202 | 594[0n] | <i>Arothron hispidus</i>       | Light trap |
| COLOR | COLOR295-15 | M0501_111 | BOLD:AAB9202 | 611[0n] | <i>Arothron hispidus</i>       | Light trap |
| COLOR | COLOR296-15 | M0501_121 | BOLD:AAD6159 | 628[1n] | <i>Pervagor janthinosoma</i>   | Light trap |
| COLOR | COLOR297-15 | M0501_131 | BOLD:AAC6467 | 609[0n] | <i>Acanthurus xanthopterus</i> | Light trap |
| COLOR | COLOR298-15 | M0501_141 | BOLD:AAB8729 | 646[0n] | <i>Acanthurus nigricauda</i>   | Light trap |
| COLOR | COLOR299-15 | M0501_151 | BOLD:ACF0223 | 590[0n] | <i>Parupeneus macronemus</i>   | Light trap |
| COLOR | COLOR300-15 | M0501_161 | BOLD:AAC6244 | 611[0n] | <i>Polydactylus plebeius</i>   | Light trap |
| COLOR | COLOR301-15 | M0501_171 | BOLD:AAB9202 | 596[0n] | <i>Arothron hispidus</i>       | Light trap |
| COLOR | COLOR302-15 | M0501_181 | BOLD:AAB3276 | 611[0n] | <i>Lutjanus gibbus</i>         | Light trap |
| COLOR | COLOR303-15 | M0502_011 | BOLD:AAD3135 | 611[3n] | <i>Centropyge multispinis</i>  | Light trap |
| COLOR | COLOR304-15 | M0502_021 | BOLD:AAB8729 | 646[0n] | <i>Acanthurus nigricauda</i>   | Light trap |
| COLOR | COLOR306-15 | M0502_041 | BOLD:AAJ1709 | 611[0n] | <i>Ariosoma scheelei</i>       | Light trap |
| COLOR | COLOR307-15 | M0502_051 | BOLD:AAD5022 | 647[0n] | <i>Chromis nigrura</i>         | Light trap |
| COLOR | COLOR309-15 | M0502_071 | BOLD:AAB2988 | 635[0n] | <i>Lactoria cornuta</i>        | Light trap |
| COLOR | COLOR310-15 | M0502_081 | BOLD:AAB3382 | 611[0n] | <i>Atule</i>                   | Light trap |
| COLOR | COLOR311-15 | M0502_091 | BOLD:AAB6988 | 634[0n] | <i>Plectroglyphidodon</i>      | Light trap |
| COLOR | COLOR312-15 | M0502_101 | BOLD:AAC6467 | 647[0n] | <i>Acanthurus xanthopterus</i> | Light trap |
| COLOR | COLOR313-15 | M0502_111 | BOLD:AAC6467 | 647[0n] | <i>Acanthurus xanthopterus</i> | Light trap |
| COLOR | COLOR316-15 | M0502_141 | BOLD:AAB9564 | 647[0n] | <i>Cantherhines pardalis</i>   | Light trap |
| COLOR | COLOR317-15 | M0502_151 | BOLD:AAF0623 | 647[0n] | <i>Acanthurus blochii</i>      | Light trap |
| COLOR | COLOR319-15 | M0502_171 | BOLD:AAB9202 | 611[0n] | <i>Arothron hispidus</i>       | Light trap |
| COLOR | COLOR320-15 | M0601_011 | BOLD:ACF0223 | 611[0n] | <i>Parupeneus macronemus</i>   | Light trap |
| COLOR | COLOR321-15 | M0601_021 | BOLD:AAB9167 | 647[0n] | <i>Ctenochaetus striatus</i>   | Light trap |
| COLOR | COLOR322-15 | M0601_031 | BOLD:AAB1339 | 647[0n] | <i>Sufflamen chrysopteron</i>  | Light trap |
| COLOR | COLOR324-15 | M0601_051 | BOLD:AAJ1709 | 660[0n] | <i>Ariosoma scheelei</i>       | Light trap |
| COLOR | COLOR325-15 | M0601_061 | BOLD:ABU8857 | 611[0n] | <i>Apogonichthys perdix</i>    | Light trap |
| COLOR | COLOR328-15 | M0601_091 | BOLD:AAF2668 | 647[0n] | <i>Lactoria</i>                | Light trap |
| COLOR | COLOR329-15 | M0601_101 | BOLD:ADF5681 | 609[0n] | <i>Lutjanus fulviflamma</i>    | Light trap |
| COLOR | COLOR330-15 | M0601_111 | BOLD:AAJ1709 | 652[0n] | <i>Ariosoma scheelei</i>       | Light trap |
| COLOR | COLOR331-15 | M0601_121 | BOLD:AAU1539 | 611[0n] | <i>Taeniamia flavofasciata</i> | Light trap |
| COLOR | COLOR332-15 | M0601_131 | BOLD:AAA9362 | 589[1n] | <i>Acanthurus triostegus</i>   | Light trap |

|       |             |           |              |         |                                |            |
|-------|-------------|-----------|--------------|---------|--------------------------------|------------|
| COLOR | COLOR333-15 | M0602_011 | BOLD:AAB8729 | 647[0n] | <i>Acanthurus nigricauda</i>   | Light trap |
| COLOR | COLOR334-15 | M0602_021 | BOLD:AAI4531 | 647[0n] | <i>Pseudalutarius</i>          | Light trap |
| COLOR | COLOR335-15 | M0602_031 | BOLD:AAB2685 | 648[1n] | <i>Dascyllus trimaculatus</i>  | Light trap |
| COLOR | COLOR336-15 | M0602_041 | BOLD:ABU8857 | 599[9n] | Apogonidae                     | Light trap |
| COLOR | COLOR337-15 | M0602_051 | BOLD:AAC2084 | 584[0n] | <i>Ostorhinchus</i>            | Light trap |
| COLOR | COLOR338-15 | M0602_061 | BOLD:AAB8729 | 648[0n] | <i>Acanthurus nigricauda</i>   | Light trap |
| COLOR | COLOR339-15 | M0602_071 | BOLD:ACK7521 | 655[0n] | <i>Atherinomorus</i>           | Light trap |
| COLOR | COLOR340-15 | M0602_081 | BOLD:ADF5681 | 628[1n] | <i>Lutjanus fulviflamma</i>    | Light trap |
| COLOR | COLOR344-15 | M0602_121 | BOLD:AAE6131 | 635[0n] | <i>Petroscirtes</i>            | Light trap |
| COLOR | COLOR345-15 | M0602_131 | BOLD:AAC1521 | 636[0n] | <i>Lethrinus</i>               | Light trap |
| COLOR | COLOR346-15 | M0602_141 | BOLD:AAC8278 | 647[1n] | <i>Neonippon</i>               | Light trap |
| COLOR | COLOR347-15 | M0602_151 | BOLD:AAC4542 | 646[4n] | <i>Sebastapistes</i>           | Light trap |
| COLOR | COLOR348-15 | M0602_161 | BOLD:AAB9202 | 635[0n] | <i>Arothron hispidus</i>       | Light trap |
| COLOR | COLOR349-15 | M0602_171 | BOLD:AAC1521 | 505[0n] | <i>Lethrinus</i>               | Light trap |
| COLOR | COLOR350-15 | M0602_181 | BOLD:AAC1521 | 635[0n] | <i>Lethrinus</i>               | Light trap |
| COLOR | COLOR351-15 | M0602_191 | BOLD:AAC9155 | 635[0n] | <i>Bothus pantherinus</i>      | Light trap |
| COLOR | COLOR352-15 | M0602_201 | BOLD:AAC9155 | 635[0n] | <i>Bothus pantherinus</i>      | Light trap |
| COLOR | COLOR353-15 | M0602_211 | BOLD:AAD2857 | 635[0n] | <i>Arothron immaculatus</i>    | Light trap |
| COLOR | COLOR354-15 | M0603_011 | BOLD:AAD8454 | 635[0n] | <i>Ostorhinchus</i>            | Light trap |
| COLOR | COLOR355-15 | M0603_021 | BOLD:AAC1521 | 635[0n] | <i>Lethrinus</i>               | Light trap |
| COLOR | COLOR357-15 | M0603_041 | BOLD:AAD8453 | 635[0n] | <i>Ostorhinchus</i>            | Light trap |
| COLOR | COLOR358-15 | M0603_051 | BOLD:AAB2685 | 635[0n] | <i>Dascyllus trimaculatus</i>  | Light trap |
| COLOR | COLOR360-15 | M0603_071 | BOLD:AAD2206 | 635[0n] | <i>Apogon</i>                  | Light trap |
| COLOR | COLOR362-15 | M0603_091 | BOLD:AAC4543 | 635[0n] | <i>Sebastapistes</i>           | Light trap |
| COLOR | COLOR363-15 | M0603_101 | BOLD:AAC9155 | 579[0n] | <i>Bothus pantherinus</i>      | Light trap |
| COLOR | COLOR364-15 | M0603_111 | BOLD:ADF5681 | 635[0n] | <i>Lutjanus fulviflamma</i>    | Light trap |
| COLOR | COLOR366-15 | M0603_131 | BOLD:AAC9155 | 634[0n] | <i>Bothus pantherinus</i>      | Light trap |
| COLOR | COLOR367-15 | M0603_141 | BOLD:ACY8623 | 634[0n] | <i>Trachinocephalus</i>        | Light trap |
| COLOR | COLOR368-15 | M0603_151 | BOLD:ACV7999 | 635[0n] | Clupeidae                      | Light trap |
| COLOR | COLOR369-15 | M0603_161 | BOLD:ACY6212 | 635[0n] | Platycephalidae                | Light trap |
| COLOR | COLOR370-15 | M0603_171 | BOLD:AAD8726 | 635[0n] | <i>Fowleria</i>                | Light trap |
| COLOR | COLOR371-15 | M0603_181 | BOLD:AAA9362 | 635[0n] | <i>Acanthurus triostegus</i>   | Light trap |
| COLOR | COLOR372-15 | M0603_191 | BOLD:AAD8726 | 635[0n] | <i>Fowleria</i>                | Light trap |
| COLOR | COLOR373-15 | M0603_201 | BOLD:ACV6948 | 652[0n] | Apogonidae                     | Light trap |
| COLOR | COLOR374-15 | M0603_211 | BOLD:ACV6948 | 635[0n] | Apogonidae                     | Light trap |
| COLOR | COLOR377-15 | M0603_241 | BOLD:AAC4543 | 561[0n] | <i>Sebastapistes</i>           | Light trap |
| COLOR | COLOR378-15 | M0603_251 | BOLD:ADF5681 | 635[0n] | <i>Lutjanus fulviflamma</i>    | Light trap |
| COLOR | COLOR381-15 | M0603_281 | BOLD:AAB6438 | 635[0n] | <i>Lethrinus mahsena</i>       | Light trap |
| COLOR | COLOR382-15 | M0603_291 | BOLD:ACV9601 | 635[0n] | <i>Ostorhinchus</i>            | Light trap |
| COLOR | COLOR384-15 | M0603_311 | BOLD:AAE6131 | 635[0n] | <i>Petroscirtes</i>            | Light trap |
| COLOR | COLOR616-15 | M0000_051 | BOLD:AAE6131 | 635[0n] | <i>Petroscirtes</i>            | Light trap |
| COLOR | COLOR617-15 | M0000_061 | BOLD:AAA9362 | 635[0n] | <i>Acanthurus triostegus</i>   | Light trap |
| COLOR | COLOR618-15 | M0000_071 | BOLD:AAC6467 | 635[0n] | <i>Acanthurus xanthopterus</i> | Light trap |
| COLOR | COLOR619-15 | M0000_081 | BOLD:AAY3550 | 635[0n] | <i>Pomacentrus trilineatus</i> | Light trap |
| COLOR | COLOR620-15 | M0000_091 | BOLD:AAY3550 | 635[0n] | <i>Pomacentrus trilineatus</i> | Light trap |

|       |             |           |              |         |                                        |            |
|-------|-------------|-----------|--------------|---------|----------------------------------------|------------|
| COLOR | COLOR622-15 | M0201_182 | BOLD:AAB2685 | 635[0n] | <i>Dascyllus trimaculatus</i>          | Light trap |
| COLOR | COLOR623-15 | M0203_201 | BOLD:AAF2723 | 635[0n] | <i>Chrysiptera annulata</i>            | Light trap |
| COLOR | COLOR624-15 | M0203_211 | BOLD:AAY3550 | 635[0n] | <i>Pomacentrus trilineatus</i>         | Light trap |
| COLOR | COLOR625-15 | M0203_221 | BOLD:AAY3550 | 635[0n] | <i>Pomacentrus trilineatus</i>         | Light trap |
| COLOR | COLOR626-15 | M0203_231 | BOLD:AAY3550 | 635[0n] | <i>Pomacentrus trilineatus</i>         | Light trap |
| COLOR | COLOR627-15 | M0301_261 | BOLD:AAF2723 | 635[0n] | <i>Chrysiptera annulata</i>            | Light trap |
| COLOR | COLOR629-15 | M0301_281 | BOLD:AAC2848 | 635[0n] | <i>Chaetodon melannotus</i>            | Light trap |
| COLOR | COLOR630-15 | M0301_291 | BOLD:AAB4985 | 635[0n] | <i>Chromis viridis</i>                 | Light trap |
| COLOR | COLOR631-15 | M0301_301 | BOLD:AAB4985 | 635[0n] | <i>Chromis viridis</i>                 | Light trap |
| COLOR | COLOR632-15 | M0301_311 | BOLD:AAY3550 | 635[0n] | <i>Pomacentrus trilineatus</i>         | Light trap |
| COLOR | COLOR633-15 | M0301_321 | BOLD:AAB4091 | 635[0n] | <i>Dascyllus abudafur</i>              | Light trap |
| COLOR | COLOR636-15 | M0302_421 | BOLD:AAE1213 | 635[0n] | <i>Chaetodon xanthocephalus</i>        | Light trap |
| COLOR | COLOR638-15 | M0302_441 | BOLD:AAB4091 | 635[0n] | <i>Dascyllus abudafur</i>              | Light trap |
| COLOR | COLOR639-15 | M0302_451 | BOLD:AAB4985 | 635[0n] | <i>Chromis viridis</i>                 | Light trap |
| COLOR | COLOR640-15 | M0302_461 | BOLD:AAB6988 | 635[0n] | <i>Plectroglyphidodon</i>              | Light trap |
| COLOR | COLOR642-15 | M0302_481 | BOLD:AAB2685 | 635[0n] | <i>Dascyllus trimaculatus</i>          | Light trap |
| COLOR | COLOR644-15 | M0302_501 | BOLD:AAY3550 | 639[0n] | <i>Pomacentrus trilineatus</i>         | Light trap |
| COLOR | COLOR648-15 | M0303_022 | BOLD:AAF0628 | 635[0n] | <i>Corythoichthys haematopterus</i>    | Light trap |
| COLOR | COLOR649-15 | M0303_232 | BOLD:AAY3550 | 635[0n] | <i>Pomacentrus trilineatus</i>         | Light trap |
| COLOR | COLOR650-15 | M0401_461 | BOLD:AAB3276 | 646[0n] | <i>Lutjanus gibbus</i>                 | Light trap |
| COLOR | COLOR651-15 | M0401_471 | BOLD:AAD7114 | 660[0n] | <i>Dascyllus carneus</i>               | Light trap |
| COLOR | COLOR652-15 | M0403_051 | BOLD:ACY8418 | 635[0n] | <i>Omobranchus</i>                     | Light trap |
| COLOR | COLOR653-15 | M0403_061 | BOLD:ABU8857 | 635[0n] | Apogonidae                             | Light trap |
| COLOR | COLOR654-15 | M0403_071 | BOLD:AAA9698 | 635[0n] | <i>Monodactylus argenteus</i>          | Light trap |
| COLOR | COLOR655-15 | M0403_081 | BOLD:AAB3424 | 635[0n] | <i>Sargocentron diadema</i>            | Light trap |
| COLOR | COLOR656-15 | M0403_091 | BOLD:AAE5342 | 635[0n] | <i>Hippichthys</i> sp.                 | Light trap |
| COLOR | COLOR657-15 | M0403_101 | BOLD:AAE5342 | 635[0n] | <i>Hippichthys</i> sp.                 | Light trap |
| COLOR | COLOR658-15 | M0403_111 | BOLD:AAE5342 | 635[0n] | <i>Hippichthys</i> sp.                 | Light trap |
| COLOR | COLOR659-15 | M0403_121 | BOLD:AAB9202 | 635[0n] | <i>Arothron hispidus</i>               | Light trap |
| COLOR | COLOR660-15 | M0403_131 | BOLD:AAC6467 | 635[0n] | <i>Acanthurus xanthopterus</i>         | Light trap |
| COLOR | COLOR663-16 | M0000_003 | BOLD:ACV9382 | 635[0n] | Gobiidae                               | Light trap |
| IFBIO | IFBIO001-17 | S0013_003 | BOLD:AAC6467 | 611[0n] | <i>Acanthurus xanthopterus</i>         | Seine net  |
| IFBIO | IFBIO002-17 | S0001_033 | BOLD:AAE4025 | 611[0n] | <i>Acanthurus mata</i>                 | Seine net  |
| IFBIO | IFBIO003-17 | S0001_023 | BOLD:AAB8729 | 609[0n] | <i>Acanthurus nigricauda</i>           | Seine net  |
| IFBIO | IFBIO004-17 | S0006_019 | BOLD:AAE4046 | 609[0n] | <i>Acanthurus dussumieri</i>           | Seine net  |
| IFBIO | IFBIO005-17 | S0019_024 | BOLD:AAB8729 | 609[0n] | <i>Acanthurus nigricauda</i>           | Seine net  |
| IFBIO | IFBIO006-17 | S0007_008 | BOLD:AAD2297 | 609[0n] | <i>Carangoides</i>                     | Seine net  |
| IFBIO | IFBIO007-17 | S0028_001 | BOLD:AAB7827 | 645[0n] | <i>Alectis ciliaris</i>                | Seine net  |
| IFBIO | IFBIO008-17 | S0007_025 | BOLD:AAC2887 | 610[0n] | <i>Herklotsichthys quadrimaculatus</i> | Seine net  |
| IFBIO | IFBIO009-17 | S0005_014 | BOLD:AAX0875 | 616[0n] | <i>Hippocampus camelopardalis</i>      | Seine net  |
| IFBIO | IFBIO010-17 | S0008_016 | BOLD:AAB8727 | 611[0n] | <i>Amblygobius</i>                     | Seine net  |
| IFBIO | IFBIO011-17 | S0008_027 | BOLD:AAO6018 | 611[0n] | <i>Antennarius</i>                     | Seine net  |
| IFBIO | IFBIO012-17 | S0010_008 | BOLD:AAO6018 | 611[0n] | <i>Antennarius</i>                     | Seine net  |
| IFBIO | IFBIO013-17 | S0006_021 | BOLD:AAO6018 | 609[0n] | <i>Antennarius</i>                     | Seine net  |



|       |             |           |              |         |                                  |           |
|-------|-------------|-----------|--------------|---------|----------------------------------|-----------|
| IFBIO | IFBIO014-17 | S0003_030 | BOLD:ABU8856 | 609[0n] | <i>Foa fo</i>                    | Seine net |
| IFBIO | IFBIO015-17 | S0035_002 | BOLD:AAD1777 | 634[0n] | <i>Pempheris</i>                 | Seine net |
| IFBIO | IFBIO016-17 | S0001_046 | BOLD:ABU8857 | 609[0n] | Apogonidae                       | Seine net |
| IFBIO | IFBIO017-17 | S0003_008 | BOLD:AAD0849 | 545[0n] | <i>Scarus</i>                    | Seine net |
| IFBIO | IFBIO018-17 | S0006_003 | BOLD:ADI1552 | 609[0n] | Apogonidae                       | Seine net |
| IFBIO | IFBIO019-17 | S0001_045 | BOLD:ABU8857 | 609[0n] | Apogonidae                       | Seine net |
| IFBIO | IFBIO020-17 | S0003_034 | BOLD:ACV9601 | 645[0n] | <i>Ostorhinchus</i>              | Seine net |
| IFBIO | IFBIO021-17 | S0001_050 | BOLD:AAB8394 | 611[0n] | <i>Zoramia</i>                   | Seine net |
| IFBIO | IFBIO022-17 | S0009_018 | BOLD:AAU1539 | 611[0n] | <i>Taeniamia flavofasciata</i>   | Seine net |
| IFBIO | IFBIO023-17 | S0010_029 | BOLD:AAU1539 | 611[0n] | <i>Taeniamia flavofasciata</i>   | Seine net |
| IFBIO | IFBIO024-17 | S0004_076 | BOLD:ABU8857 | 609[0n] | Apogonidae                       | Seine net |
| IFBIO | IFBIO025-17 | S0015_011 | BOLD:AAU1539 | 609[0n] | <i>Taeniamia flavofasciata</i>   | Seine net |
| IFBIO | IFBIO026-17 | S0024_001 | BOLD:AAD0474 | 609[0n] | <i>Balistoides viridescens</i>   | Seine net |
| IFBIO | IFBIO027-17 | S0004_012 | BOLD:AAC9155 | 609[0n] | <i>Bothus pantherinus</i>        | Seine net |
| IFBIO | IFBIO028-17 | S0005_056 | BOLD:ADI1616 | 642[0n] | Bothidae                         | Seine net |
| IFBIO | IFBIO029-17 | S0002_010 | BOLD:ADI1616 | 611[0n] | Bothidae                         | Seine net |
| IFBIO | IFBIO031-17 | S0012_017 | BOLD:AAN1422 | 647[0n] | <i>Diplogrammus infulatus</i>    | Seine net |
| IFBIO | IFBIO032-17 | S0015_037 | BOLD:AAI9445 | 645[0n] | <i>Cymolutes torquatus</i>       | Seine net |
| IFBIO | IFBIO033-17 | S0001_003 | BOLD:AAD4765 | 645[0n] | <i>Calotomus spinidens</i>       | Seine net |
| IFBIO | IFBIO034-17 | S0019_010 | BOLD:AAD4765 | 645[0n] | <i>Calotomus spinidens</i>       | Seine net |
| IFBIO | IFBIO035-17 | S0004_065 | BOLD:AAI6357 | 633[0n] | <i>Paramonacanthus frenatus</i>  | Seine net |
| IFBIO | IFBIO036-17 | S0002_019 | BOLD:AAI6357 | 609[0n] | <i>Paramonacanthus frenatus</i>  | Seine net |
| IFBIO | IFBIO037-17 | S0011_013 | BOLD:AAI6357 | 648[0n] | <i>Paramonacanthus frenatus</i>  | Seine net |
| IFBIO | IFBIO038-17 | S0001_016 | BOLD:AAV6227 | 609[0n] | <i>Paramonacanthus pusillus</i>  | Seine net |
| IFBIO | IFBIO039-17 | S0002_036 | BOLD:AAI6357 | 611[0n] | <i>Paramonacanthus frenatus</i>  | Seine net |
| IFBIO | IFBIO040-17 | S0003_028 | BOLD:AAI6357 | 609[0n] | <i>Paramonacanthus frenatus</i>  | Seine net |
| IFBIO | IFBIO041-17 | S0006_013 | BOLD:AAI6357 | 648[0n] | <i>Paramonacanthus frenatus</i>  | Seine net |
| IFBIO | IFBIO042-17 | S0014_022 | BOLD:AAI6357 | 648[0n] | <i>Paramonacanthus frenatus</i>  | Seine net |
| IFBIO | IFBIO043-17 | S0032_019 | BOLD:AAI6357 | 642[0n] | <i>Paramonacanthus frenatus</i>  | Seine net |
| IFBIO | IFBIO044-17 | S0010_002 | BOLD:AAC2745 | 611[0n] | <i>Carangoides fulvoguttatus</i> | Seine net |
| IFBIO | IFBIO045-17 | S0013_004 | BOLD:AAB2977 | 611[0n] | <i>Carangoides chrysophrys</i>   | Seine net |
| IFBIO | IFBIO046-17 | S0015_024 | BOLD:AAB0585 | 609[0n] | <i>Caranx melampygus</i>         | Seine net |
| IFBIO | IFBIO047-17 | S0023_008 | BOLD:AAB0585 | 609[0n] | <i>Caranx melampygus</i>         | Seine net |
| IFBIO | IFBIO048-17 | S0013_002 | BOLD:AAB0587 | 611[0n] | <i>Caranx ignobilis</i>          | Seine net |
| IFBIO | IFBIO049-17 | S0015_023 | BOLD:AAB0587 | 609[0n] | <i>Caranx ignobilis</i>          | Seine net |
| IFBIO | IFBIO050-17 | S0012_001 | BOLD:AAD2297 | 611[0n] | <i>Carangoides</i>               | Seine net |
| IFBIO | IFBIO051-17 | S0023_005 | BOLD:AAD6117 | 609[0n] | <i>Carangoides hedlandensis</i>  | Seine net |
| IFBIO | IFBIO052-17 | S0022_008 | BOLD:AAB0584 | 609[0n] | <i>Caranx sexfasciatus</i>       | Seine net |
| IFBIO | IFBIO053-17 | S0005_003 | BOLD:AAB7096 | 609[0n] | <i>Gazza</i>                     | Seine net |
| IFBIO | IFBIO054-17 | S0009_032 | BOLD:AAB3198 | 611[0n] | <i>Chaetodon vagabundus</i>      | Seine net |
| IFBIO | IFBIO055-17 | S0025_006 | BOLD:AAB3198 | 609[0n] | <i>Chaetodon vagabundus</i>      | Seine net |
| IFBIO | IFBIO056-17 | S0031_004 | BOLD:AAC2848 | 645[0n] | <i>Chaetodon melannotus</i>      | Seine net |
| IFBIO | IFBIO058-17 | S0004_066 | BOLD:AAC3195 | 645[0n] | <i>Oxycheilinus</i>              | Seine net |
| IFBIO | IFBIO059-17 | S0004_082 | BOLD:AAC3195 | 645[0n] | <i>Oxycheilinus</i>              | Seine net |
| IFBIO | IFBIO060-17 | S0005_043 | BOLD:AAB4186 | 609[0n] | <i>Cheilinus</i>                 | Seine net |

|       |              |           |              |         |                                   |           |
|-------|--------------|-----------|--------------|---------|-----------------------------------|-----------|
| IFBIO | IFBIO061-17  | S0001_029 | BOLD:AAA6101 | 612[0n] | <i>Cheilio inermis</i>            | Seine net |
| IFBIO | IFBIO062-17  | S0011_006 | BOLD:ADI3805 | 648[0n] | Labridae                          | Seine net |
| IFBIO | IFBIO063-17  | S0011_008 | BOLD:ADI3805 | 648[0n] | Labridae                          | Seine net |
| IFBIO | IFBIO064-17  | S0001_049 | BOLD:ABU8169 | 647[0n] | <i>Cheilodipterus</i>             | Seine net |
| IFBIO | IFBIO065-17  | S0035_001 | BOLD:ADI4531 | 627[0n] | Clupeidae                         | Seine net |
| IFBIO | IFBIO066-17  | S0028_007 | BOLD:ACY6212 | 645[0n] | Platycephalidae                   | Seine net |
| IFBIO | IFBIO067-17  | S0005_006 | BOLD:AAX0875 | 606[0n] | <i>Hippocampus camelopardalis</i> | Seine net |
| IFBIO | IFBIO068-17  | S0004_073 | BOLD:AAJ1709 | 645[0n] | <i>Ariosoma scheelei</i>          | Seine net |
| IFBIO | IFBIO069-17  | S0005_020 | BOLD:AAX0875 | 616[0n] | <i>Hippocampus camelopardalis</i> | Seine net |
| IFBIO | IFBIO070-17  | S0001_018 | BOLD:AAF7751 | 625[0n] | <i>Cymolutes praetextatus</i>     | Seine net |
| IFBIO | IFBIO071-17  | S0008_026 | BOLD:AAF7751 | 648[0n] | <i>Cymolutes praetextatus</i>     | Seine net |
| IFBIO | IFBIO072-17  | S0002_065 | BOLD:AAI9445 | 648[0n] | <i>Cymolutes torquatus</i>        | Seine net |
| IFBIO | IFBIO073-17  | S0008_050 | BOLD:AAI9445 | 648[0n] | <i>Cymolutes torquatus</i>        | Seine net |
| IFBIO | IFBIO074-17  | S0020_006 | BOLD:AAF7751 | 609[0n] | <i>Cymolutes praetextatus</i>     | Seine net |
| IFBIO | IFBIO075-17  | S0009_027 | BOLD:AAB5966 | 611[0n] | <i>Dactyloptena</i>               | Seine net |
| IFBIO | IFBIO076-17  | S0024_003 | BOLD:AAB5966 | 609[0n] | <i>Dactyloptena</i>               | Seine net |
| IFBIO | IFBIO077-17  | S0004_026 | BOLD:AAB5966 | 648[0n] | <i>Dactyloptena</i>               | Seine net |
| IFBIO | IFBIO078-17  | S0023_009 | BOLD:AAB3382 | 609[0n] | <i>Atule</i>                      | Seine net |
| IFBIO | IFBIO079-17  | S0015_016 | BOLD:AAD4477 | 648[0n] | <i>Diagramma</i>                  | Seine net |
| IFBIO | IFBIO080-17  | S0002_042 | BOLD:AAG4825 | 611[0n] | <i>Stolephorus</i>                | Seine net |
| IFBIO | IFBIO081-17  | S0006_044 | BOLD:AAE6346 | 609[0n] | <i>Gerres oblongus</i>            | Seine net |
| IFBIO | IFBIO082-17  | S0015_048 | BOLD:AAE6359 | 639[0n] | <i>Gerres</i>                     | Seine net |
| IFBIO | IFBIO083-17  | S0016_015 | BOLD:AAC0377 | 639[0n] | <i>Gerres</i>                     | Seine net |
| IFBIO | IFBIO084-17  | S0028_002 | BOLD:AAE6346 | 609[0n] | <i>Gerres oblongus</i>            | Seine net |
| IFBIO | IFBIO085-17  | S0031_018 | BOLD:AAC1291 | 600[0n] | <i>Gerres</i>                     | Seine net |
| IFBIO | IFBIO086-17  | S0036_002 | BOLD:AAE6359 | 609[0n] | <i>Gerres</i>                     | Seine net |
| IFBIO | IFBIO087-17  | S0015_046 | BOLD:AAJ2321 | 609[0n] | <i>Amblygobius sphynx</i>         | Seine net |
| IFBIO | IFBIO088-17  | S0001_047 | BOLD:AAC0108 | 609[0n] | <i>Asterropteryx</i>              | Seine net |
| IFBIO | IFBIO089-17  | S0015_005 | BOLD:AAI3352 | 609[0n] | <i>Oplopomus</i>                  | Seine net |
| IFBIO | IFBIO090-17  | S0005_051 | BOLD:AAC0108 | 609[0n] | <i>Asterropteryx</i>              | Seine net |
| IFBIO | IFBIO091-17  | S0002_037 | BOLD:AAI5395 | 609[0n] | <i>Gnatholepis</i>                | Seine net |
| IFBIO | IFBIO092-17  | S0001_013 | BOLD:AAC1405 | 609[0n] | <i>Parupeneus rubescens</i>       | Seine net |
| IFBIO | IFBIO093-17  | S0003_010 | BOLD:AAI5395 | 609[0n] | <i>Gnatholepis</i>                | Seine net |
| IFBIO | IFBIO094-17  | S0001_051 | BOLD:AAI3352 | 609[0n] | <i>Oplopomus</i>                  | Seine net |
| IFBIO | IFBIO095-17  | S0004_048 | BOLD:AAI3352 | 609[0n] | <i>Oplopomus</i>                  | Seine net |
| IFBIO | IFBIO096-17  | S0008_033 | BOLD:AAX0875 | 615[0n] | <i>Hippocampus camelopardalis</i> | Seine net |
| IFBIO | IFBIO097-17  | S0008_009 | BOLD:AAX0875 | 613[0n] | <i>Hippocampus camelopardalis</i> | Seine net |
| IFBIO | IFBIO098-17  | S0006_017 | BOLD:AAE5356 | 610[0n] | <i>Hippocampus</i>                | Seine net |
| IFBIO | IFBIO099-17  | S0005_001 | BOLD:AAX0875 | 615[0n] | <i>Hippocampus camelopardalis</i> | Seine net |
| IFBIO | IFBIO1000-18 | S0044_004 | BOLD:ACG8874 | 609[1n] | <i>Solenostomus cyanopterus</i>   | Seine net |
| IFBIO | IFBIO1001-18 | S0045_003 | BOLD:ABY6363 | 609[0n] | <i>Lethrinus</i>                  | Seine net |
| IFBIO | IFBIO100-17  | S0001_015 | BOLD:ABY4451 | 594[0n] | <i>Scarus</i>                     | Seine net |
| IFBIO | IFBIO1002-18 | S0045_001 | BOLD:ABY6363 | 609[0n] | <i>Lethrinus</i>                  | Seine net |

|       |              |           |              |         |                                     |           |
|-------|--------------|-----------|--------------|---------|-------------------------------------|-----------|
| IFBIO | IFBIO1003-18 | S0045_002 | BOLD:ADN9632 | 639[2n] | <i>Lethrinus</i>                    | Seine net |
| IFBIO | IFBIO1006-18 | S0046_001 | BOLD:ABZ0131 | 609[4n] | <i>Lethrinus</i>                    | Seine net |
| IFBIO | IFBIO1007-18 | S0046_005 | BOLD:AAC1521 | 609[0n] | <i>Lethrinus</i>                    | Seine net |
| IFBIO | IFBIO1010-18 | S0046_006 | BOLD:AAC4542 | 609[0n] | <i>Sebastapistes</i>                | Seine net |
| IFBIO | IFBIO1011-18 | S0046_007 | BOLD:AAC4542 | 618[0n] | <i>Sebastapistes</i>                | Seine net |
| IFBIO | IFBIO101-17  | S0027_002 | BOLD:AAI3352 | 609[0n] | <i>Oplopomus</i>                    | Seine net |
| IFBIO | IFBIO1012-18 | S0046_008 | BOLD:ACY6212 | 609[0n] | Platycephalidae                     | Seine net |
| IFBIO | IFBIO1020-18 | S0049_011 | BOLD:ADM8951 | 612[0n] | <i>Cymolutes</i>                    | Seine net |
| IFBIO | IFBIO1021-18 | S0049_002 | BOLD:AAY3550 | 609[0n] | <i>Pomacentrus trilineatus</i>      | Seine net |
| IFBIO | IFBIO102-17  | S0009_028 | BOLD:ACE6993 | 618[0n] | <i>Hippocampus</i>                  | Seine net |
| IFBIO | IFBIO1026-18 | S0049_008 | BOLD:AAC4543 | 609[0n] | <i>Sebastapistes</i>                | Seine net |
| IFBIO | IFBIO1027-18 | S0049_004 | BOLD:ADI1740 | 609[0n] | Syngnathidae                        | Seine net |
| IFBIO | IFBIO1028-18 | S0049_003 | BOLD:AAB2341 | 609[0n] | <i>Siganus laqueus</i>              | Seine net |
| IFBIO | IFBIO1029-18 | S0050_018 | BOLD:AAC2101 | 609[0n] | <i>Coris caudimacula</i>            | Seine net |
| IFBIO | IFBIO1030-18 | S0050_010 | BOLD:AAC8078 | 612[0n] | <i>Lethrinus</i>                    | Seine net |
| IFBIO | IFBIO103-17  | S0008_035 | BOLD:ACE6993 | 615[0n] | <i>Hippocampus</i>                  | Seine net |
| IFBIO | IFBIO1032-18 | S0050_008 | BOLD:AAB0511 | 609[0n] | <i>Lethrinus</i> BOLDAAB0511        | Seine net |
| IFBIO | IFBIO1034-18 | S0050_005 | BOLD:AAX0875 | 606[0n] | <i>Hippocampus camelopardalis</i>   | Seine net |
| IFBIO | IFBIO1035-18 | S0050_017 | BOLD:ACF0042 | 612[0n] | <i>Chromis</i>                      | Seine net |
| IFBIO | IFBIO1036-18 | S0050_011 | BOLD:AAB4823 | 612[0n] | <i>Caesio</i>                       | Seine net |
| IFBIO | IFBIO1039-18 | S0050_002 | BOLD:AAU1214 | 609[0n] | Scorpaenidae                        | Seine net |
| IFBIO | IFBIO1040-18 | S0050_012 | BOLD:ADM8879 | 609[0n] | Gobiidae                            | Seine net |
| IFBIO | IFBIO104-17  | S0009_031 | BOLD:ACE6993 | 612[0n] | <i>Hippocampus</i>                  | Seine net |
| IFBIO | IFBIO1042-18 | S0050_015 | BOLD:ABU8169 | 609[0n] | <i>Cheilodipterus</i>               | Seine net |
| IFBIO | IFBIO1045-18 | S0050_004 | BOLD:AAD4824 | 609[0n] | <i>Stethojulis</i>                  | Seine net |
| IFBIO | IFBIO1046-18 | S0050_014 | BOLD:ADM7122 | 612[0n] | <i>Parupeneus</i>                   | Seine net |
| IFBIO | IFBIO1047-18 | S0050_001 | BOLD:AAC4148 | 609[0n] | <i>Tylosurus</i>                    | Seine net |
| IFBIO | IFBIO1048-18 | S0051_009 | BOLD:AAC5611 | 609[0n] | <i>Valenciennea sexguttata</i>      | Seine net |
| IFBIO | IFBIO1050-18 | S0051_008 | BOLD:ABU8857 | 609[0n] | Apogonidae                          | Seine net |
| IFBIO | IFBIO105-17  | S0008_034 | BOLD:AAC5611 | 611[0n] | <i>Valenciennea sexguttata</i>      | Seine net |
| IFBIO | IFBIO1052-18 | S0051_006 | BOLD:ABY6363 | 609[0n] | <i>Lethrinus</i>                    | Seine net |
| IFBIO | IFBIO1053-18 | S0051_002 | BOLD:AAC1521 | 612[0n] | <i>Lethrinus</i>                    | Seine net |
| IFBIO | IFBIO1055-18 | S0051_007 | BOLD:AAC8078 | 612[0n] | <i>Lethrinus</i>                    | Seine net |
| IFBIO | IFBIO1058-18 | S0051_011 | BOLD:AAF0628 | 609[0n] | <i>Corythoichthys haematopterus</i> | Seine net |
| IFBIO | IFBIO1059-18 | S0052_001 | BOLD:AAC9564 | 606[3n] | <i>Dendrochirus</i>                 | Seine net |
| IFBIO | IFBIO1061-18 | S0052_002 | BOLD:AAB5069 | 606[0n] | <i>Synodus variegatus</i>           | Seine net |
| IFBIO | IFBIO106-17  | S0008_036 | BOLD:AAX0875 | 606[0n] | <i>Hippocampus camelopardalis</i>   | Seine net |
| IFBIO | IFBIO1063-18 | S0052_008 | BOLD:AAD4765 | 609[0n] | <i>Calotomus spinidens</i>          | Seine net |
| IFBIO | IFBIO1064-18 | S0052_005 | BOLD:AAX0875 | 606[0n] | <i>Hippocampus camelopardalis</i>   | Seine net |
| IFBIO | IFBIO1065-18 | S0052_004 | BOLD:AAX0875 | 582[1n] | <i>Hippocampus camelopardalis</i>   | Seine net |
| IFBIO | IFBIO1068-18 | S0053_003 | BOLD:AAC1521 | 612[0n] | <i>Lethrinus</i>                    | Seine net |
| IFBIO | IFBIO107-17  | S0014_025 | BOLD:AAC7896 | 647[0n] | <i>Halichoeres</i>                  | Seine net |
| IFBIO | IFBIO1072-18 | S0053_005 | BOLD:ADI1740 | 597[0n] | Syngnathidae                        | Seine net |

|       |              |           |              |         |                                      |           |
|-------|--------------|-----------|--------------|---------|--------------------------------------|-----------|
| IFBIO | IFBIO1073-18 | S0054_008 | BOLD:ABW6983 | 609[0n] | Scaridae                             | Seine net |
| IFBIO | IFBIO1074-18 | S0054_011 | BOLD:ACY6212 | 609[0n] | Platycephalidae                      | Seine net |
| IFBIO | IFBIO1075-18 | S0054_009 | BOLD:AAI6160 | 606[0n] | <i>Papilloculiceps longiceps</i>     | Seine net |
| IFBIO | IFBIO1078-18 | S0054_010 | BOLD:ACG8874 | 609[0n] | <i>Solenostomus cyanopterus</i>      | Seine net |
| IFBIO | IFBIO108-17  | S0013_009 | BOLD:AAX0875 | 606[0n] | <i>Hippocampus camelopardalis</i>    | Seine net |
| IFBIO | IFBIO1085-18 | S0054_003 | BOLD:ABY6363 | 609[0n] | <i>Lethrinus</i>                     | Seine net |
| IFBIO | IFBIO1086-18 | S0054_007 | BOLD:AAC1547 | 596[0n] | <i>Lethrinus</i>                     | Seine net |
| IFBIO | IFBIO1088-18 | S0054_006 | BOLD:AAC1521 | 597[0n] | <i>Lethrinus</i>                     | Seine net |
| IFBIO | IFBIO109-17  | S0008_008 | BOLD:AAX0875 | 610[0n] | <i>Hippocampus camelopardalis</i>    | Seine net |
| IFBIO | IFBIO1092-18 | S0055_007 | BOLD:AAI4531 | 612[0n] | <i>Pseudalutarius</i>                | Seine net |
| IFBIO | IFBIO1093-18 | S0055_006 | BOLD:AAB0512 | 609[0n] | <i>Scomberoides lysan</i>            | Seine net |
| IFBIO | IFBIO1095-18 | S0055_003 | BOLD:AAC1521 | 612[0n] | <i>Lethrinus</i>                     | Seine net |
| IFBIO | IFBIO1096-18 | S0055_001 | BOLD:AAC1546 | 612[0n] | <i>Lethrinus xanthochilus</i>        | Seine net |
| IFBIO | IFBIO1099-18 | S0055_008 | BOLD:AAC1521 | 612[0n] | <i>Lethrinus</i>                     | Seine net |
| IFBIO | IFBIO1101-18 | S0056_001 | BOLD:AAC4980 | 609[0n] | <i>Amphiprion allardi</i>            | Seine net |
| IFBIO | IFBIO110-17  | S0001_037 | BOLD:AAC0565 | 610[0n] | <i>Hyporhamphus</i>                  | Seine net |
| IFBIO | IFBIO1102-18 | S0056_004 | BOLD:AAC8078 | 612[0n] | <i>Lethrinus</i>                     | Seine net |
| IFBIO | IFBIO1105-18 | S0056_005 | BOLD:AAB0511 | 609[0n] | <i>Lethrinus</i> BOLDAAB0511         | Seine net |
| IFBIO | IFBIO1106-18 | S0056_003 | BOLD:AAC1521 | 612[0n] | <i>Lethrinus</i>                     | Seine net |
| IFBIO | IFBIO1107-18 | S0056_009 | BOLD:ADM8209 | 609[0n] | <i>Gunnellichthys</i>                | Seine net |
| IFBIO | IFBIO1108-18 | S0056_007 | BOLD:ADN8353 | 588[0n] | <i>Hippocampus</i>                   | Seine net |
| IFBIO | IFBIO1111-18 | S0057_003 | BOLD:AAC1521 | 612[0n] | <i>Lethrinus</i>                     | Seine net |
| IFBIO | IFBIO111-17  | S0004_070 | BOLD:AAC4020 | 613[0n] | <i>Plectorhinchus flavomaculatus</i> | Seine net |
| IFBIO | IFBIO1113-18 | S0057_001 | BOLD:AAC1546 | 612[0n] | <i>Lethrinus xanthochilus</i>        | Seine net |
| IFBIO | IFBIO1115-18 | S0058_005 | BOLD:AAC1546 | 612[0n] | <i>Lethrinus xanthochilus</i>        | Seine net |
| IFBIO | IFBIO1119-18 | S0058_007 | BOLD:ADF5681 | 612[0n] | <i>Lutjanus fulviflamma</i>          | Seine net |
| IFBIO | IFBIO1120-18 | S0058_003 | BOLD:AAF8834 | 600[3n] | <i>Ablabys binotatus</i>             | Seine net |
| IFBIO | IFBIO112-17  | S0007_018 | BOLD:AAU1535 | 652[0n] | <i>Apogon</i>                        | Seine net |
| IFBIO | IFBIO1122-18 | S0059_009 | BOLD:ADO5537 | 630[0n] | <i>Hippocampus</i>                   | Seine net |
| IFBIO | IFBIO1123-18 | S0059_007 | BOLD:ADI3805 | 606[0n] | Labridae                             | Seine net |
| IFBIO | IFBIO1127-18 | S0059_002 | BOLD:AAB0511 | 609[0n] | <i>Lethrinus</i> BOLDAAB0511         | Seine net |
| IFBIO | IFBIO1128-18 | S0059_004 | BOLD:AAC8078 | 612[0n] | <i>Lethrinus</i>                     | Seine net |
| IFBIO | IFBIO1130-18 | S0059_005 | BOLD:AAC8078 | 612[0n] | <i>Lethrinus</i>                     | Seine net |
| IFBIO | IFBIO113-17  | S0009_020 | BOLD:AAB4822 | 640[0n] | <i>Caesio</i>                        | Seine net |
| IFBIO | IFBIO1133-18 | S0060_003 | BOLD:AAC8078 | 612[0n] | <i>Lethrinus</i>                     | Seine net |
| IFBIO | IFBIO1134-18 | S0060_004 | BOLD:AAC1521 | 597[0n] | <i>Lethrinus</i>                     | Seine net |
| IFBIO | IFBIO1137-18 | S0060_005 | BOLD:AAC8078 | 612[0n] | <i>Lethrinus</i>                     | Seine net |
| IFBIO | IFBIO1138-18 | S0060_002 | BOLD:AAC8078 | 612[0n] | <i>Lethrinus</i>                     | Seine net |
| IFBIO | IFBIO1139-18 | S0061_002 | BOLD:AAD4704 | 612[0n] | <i>Valenciennesa helsdingenii</i>    | Seine net |
| IFBIO | IFBIO1140-18 | S0061_006 | BOLD:AAB0673 | 609[0n] | <i>Thalassoma lunare</i>             | Seine net |
| IFBIO | IFBIO114-17  | S0007_046 | BOLD:AAE2186 | 606[0n] | <i>Stethojulis strigiventer</i>      | Seine net |
| IFBIO | IFBIO1144-18 | S0061_004 | BOLD:AAB5194 | 609[0n] | <i>Gymnocranius elongatus</i>        | Seine net |
| IFBIO | IFBIO1149-18 | S0062_002 | BOLD:AAC1521 | 597[0n] | <i>Lethrinus</i>                     | Seine net |
| IFBIO | IFBIO1151-18 | S0062_003 | BOLD:AAB0511 | 609[0n] | <i>Lethrinus</i> BOLDAAB0511         | Seine net |

|       |              |           |              |         |                                                       |           |
|-------|--------------|-----------|--------------|---------|-------------------------------------------------------|-----------|
| IFBIO | IFBIO115-17  | S0031_005 | BOLD:AAE2186 | 612[0n] | <i>Stethojulis strigiventer</i>                       | Seine net |
| IFBIO | IFBIO1152-18 | S0063_003 | BOLD:AAB9714 | 609[0n] | <i>Upeneus</i> BOLDAAB9714                            | Seine net |
| IFBIO | IFBIO1153-18 | S0063_004 | BOLD:AAX0875 | 606[0n] | <i>Hippocampus camelopardalis</i>                     | Seine net |
| IFBIO | IFBIO1155-18 | S0063_001 | BOLD:AAB0511 | 609[0n] | <i>Lethrinus</i> BOLDAAB0511                          | Seine net |
| IFBIO | IFBIO1159-18 | S0064_001 | BOLD:AAC1521 | 609[0n] | <i>Lethrinus</i>                                      | Seine net |
| IFBIO | IFBIO1162-18 | S0067_007 | BOLD:ACV9716 | 612[0n] | <i>Sphyraena</i>                                      | Seine net |
| IFBIO | IFBIO1164-18 | S0067_012 | BOLD:AAB5980 | 612[0n] | <i>Parupeneus</i>                                     | Seine net |
| IFBIO | IFBIO1165-18 | S0067_010 | BOLD:AAC1635 | 609[0n] | <i>Naso brevirostris</i>                              | Seine net |
| IFBIO | IFBIO1166-18 | S0067_005 | BOLD:AAD4666 | 609[0n] | <i>Naso annulatus</i>                                 | Seine net |
| IFBIO | IFBIO1167-18 | S0067_006 | BOLD:AAB8729 | 603[0n] | <i>Acanthurus nigricauda</i>                          | Seine net |
| IFBIO | IFBIO1168-18 | S0067_004 | BOLD:AAI4531 | 606[0n] | <i>Pseudalutarius Herklotsichthys quadrimaculatus</i> | Seine net |
| IFBIO | IFBIO1169-18 | S0067_008 | BOLD:AAC2887 | 609[0n] |                                                       | Seine net |
| IFBIO | IFBIO117-17  | S0004_020 | BOLD:AAC3195 | 637[0n] | <i>Oxycheilinus</i>                                   | Seine net |
| IFBIO | IFBIO1173-18 | S0067_011 | BOLD:AAC2084 | 609[0n] | <i>Ostorhinchus</i>                                   | Seine net |
| IFBIO | IFBIO1175-18 | S0067_017 | BOLD:ABX6347 | 606[0n] | <i>Trachinocephalus</i>                               | Seine net |
| IFBIO | IFBIO1176-18 | S0067_003 | BOLD:AAD0784 | 606[0n] | <i>Plagiotremus tapeinosoma</i>                       | Seine net |
| IFBIO | IFBIO1177-18 | S0067_001 | BOLD:AAC3195 | 609[0n] | <i>Oxycheilinus</i>                                   | Seine net |
| IFBIO | IFBIO1178-18 | S0067_018 | BOLD:AAH0503 | 609[0n] | <i>Saurida</i>                                        | Seine net |
| IFBIO | IFBIO1179-18 | S0067_020 | BOLD:AAF7751 | 609[0n] | <i>Cymolutes praetextatus</i>                         | Seine net |
| IFBIO | IFBIO1180-18 | S0067_021 | BOLD:ACT0048 | 606[0n] | Labridae                                              | Seine net |
| IFBIO | IFBIO1181-18 | S0067_015 | BOLD:AAB0511 | 606[0n] | <i>Lethrinus</i> BOLDAAB0511                          | Seine net |
| IFBIO | IFBIO118-17  | S0023_003 | BOLD:AAC0139 | 609[0n] | <i>Halichoeres scapularis</i>                         | Seine net |
| IFBIO | IFBIO1182-18 | S0067_014 | BOLD:AAC1521 | 597[0n] | <i>Lethrinus</i>                                      | Seine net |
| IFBIO | IFBIO1184-18 | S0068_005 | BOLD:AAI6160 | 609[0n] | <i>Papilloculiceps longiceps</i>                      | Seine net |
| IFBIO | IFBIO1185-18 | S0068_002 | BOLD:AAD4824 | 609[0n] | <i>Stethojulis</i>                                    | Seine net |
| IFBIO | IFBIO1186-18 | S0068_008 | BOLD:AAB5978 | 609[0n] | <i>Parupeneus</i>                                     | Seine net |
| IFBIO | IFBIO1187-18 | S0068_001 | BOLD:AAB0334 | 612[0n] | <i>Parupeneus indicus</i>                             | Seine net |
| IFBIO | IFBIO1190-18 | S0068_003 | BOLD:AAF7751 | 609[0n] | <i>Cymolutes praetextatus</i>                         | Seine net |
| IFBIO | IFBIO1191-18 | S0068_009 | BOLD:AAD0579 | 609[0n] | <i>Hyporhamphus affinis</i>                           | Seine net |
| IFBIO | IFBIO119-17  | S0008_004 | BOLD:AAC3195 | 652[0n] | <i>Oxycheilinus</i>                                   | Seine net |
| IFBIO | IFBIO1193-18 | S0069_002 | BOLD:AAG4825 | 609[0n] | <i>Stolephorus</i>                                    | Seine net |
| IFBIO | IFBIO1194-18 | S0069_004 | BOLD:AAD4765 | 609[0n] | <i>Calotomus spinidens</i>                            | Seine net |
| IFBIO | IFBIO1196-18 | S0069_003 | BOLD:AAB8729 | 603[0n] | <i>Acanthurus nigricauda</i>                          | Seine net |
| IFBIO | IFBIO1197-18 | S0069_005 | BOLD:AAC4543 | 609[0n] | <i>Sebastapistes</i>                                  | Seine net |
| IFBIO | IFBIO1199-18 | S0069_006 | BOLD:ACY6212 | 609[0n] | Platycephalidae                                       | Seine net |
| IFBIO | IFBIO1201-18 | S0069_007 | BOLD:AAB5966 | 609[0n] | <i>Dactyloptena</i>                                   | Seine net |
| IFBIO | IFBIO120-17  | S0012_005 | BOLD:AAC3195 | 651[0n] | <i>Oxycheilinus</i>                                   | Seine net |
| IFBIO | IFBIO1203-18 | S0070_003 | BOLD:AAB4823 | 609[0n] | <i>Caesio</i>                                         | Seine net |
| IFBIO | IFBIO1204-18 | S0070_004 | BOLD:AAB8394 | 612[0n] | <i>Zoramia</i>                                        | Seine net |
| IFBIO | IFBIO1205-18 | S0070_005 | BOLD:AAF8900 | 612[1n] | <i>Sphyraena cf. flavicauda</i>                       | Seine net |
| IFBIO | IFBIO1206-18 | S0070_002 | BOLD:AAC4543 | 609[0n] | <i>Sebastapistes</i>                                  | Seine net |
| IFBIO | IFBIO1209-18 | S0071_002 | BOLD:AAI6357 | 609[0n] | <i>Paramonacanthus frenatus</i>                       | Seine net |
| IFBIO | IFBIO1210-18 | S0071_006 | BOLD:ADM7915 | 609[0n] | Bothidae                                              | Seine net |
| IFBIO | IFBIO1211-18 | S0071_005 | BOLD:AAV2736 | 609[0n] | <i>Pteragogus flagellifer</i>                         | Seine net |

|       |              |           |              |         |                                    |           |
|-------|--------------|-----------|--------------|---------|------------------------------------|-----------|
| IFBIO | IFBIO121-17  | S0006_026 | BOLD:AAD8577 | 610[0n] | <i>Novaculoides macrolepidotus</i> | Seine net |
| IFBIO | IFBIO1213-18 | S0071_001 | BOLD:AAC4767 | 624[0n] | <i>Scolopsis ghanam</i>            | Seine net |
| IFBIO | IFBIO1214-18 | S0072_006 | BOLD:AAI3352 | 612[0n] | <i>Oplopomus</i>                   | Seine net |
| IFBIO | IFBIO1216-18 | S0072_002 | BOLD:AAB0512 | 606[1n] | <i>Scomberoides lysan</i>          | Seine net |
| IFBIO | IFBIO1218-18 | S0072_007 | BOLD:AAC0565 | 609[0n] | <i>Hyporhamphus</i>                | Seine net |
| IFBIO | IFBIO1221-18 | S0073_005 | BOLD:AAB2590 | 612[0n] | <i>Parupeneus</i>                  | Seine net |
| IFBIO | IFBIO122-17  | S0008_046 | BOLD:AAD8577 | 609[0n] | <i>Novaculoides macrolepidotus</i> | Seine net |
| IFBIO | IFBIO1222-18 | S0073_004 | BOLD:AAB5980 | 609[0n] | <i>Parupeneus cf. barberinus</i>   | Seine net |
| IFBIO | IFBIO1223-18 | S0073_006 | BOLD:AAY3550 | 609[0n] | <i>Pomacentrus trilineatus</i>     | Seine net |
| IFBIO | IFBIO1225-18 | S0073_008 | BOLD:AAC4543 | 609[0n] | <i>Sebastapistes</i>               | Seine net |
| IFBIO | IFBIO1226-18 | S0073_003 | BOLD:AAC8078 | 612[0n] | <i>Lethrinus</i>                   | Seine net |
| IFBIO | IFBIO1227-18 | S0073_001 | BOLD:ABZ0131 | 609[0n] | <i>Lethrinus</i>                   | Seine net |
| IFBIO | IFBIO1228-18 | S0073_002 | BOLD:AAC1521 | 612[0n] | <i>Lethrinus</i>                   | Seine net |
| IFBIO | IFBIO123-17  | S0014_009 | BOLD:AAD8577 | 609[0n] | <i>Novaculoides macrolepidotus</i> | Seine net |
| IFBIO | IFBIO1232-18 | S0074_006 | BOLD:ADN4720 | 633[0n] | <i>Lethrinus</i>                   | Seine net |
| IFBIO | IFBIO1233-18 | S0074_003 | BOLD:ADI5215 | 612[0n] | <i>Pseudochromis</i>               | Seine net |
| IFBIO | IFBIO1234-18 | S0074_007 | BOLD:AAA9578 | 609[0n] | <i>Trachinocephalus</i>            | Seine net |
| IFBIO | IFBIO1236-18 | S0075_002 | BOLD:AAB2341 | 609[0n] | <i>Siganus laqueus</i>             | Seine net |
| IFBIO | IFBIO1237-18 | S0075_004 | BOLD:ADM7236 | 612[0n] | Gobiidae                           | Seine net |
| IFBIO | IFBIO1238-18 | S0075_005 | BOLD:AAC5611 | 609[0n] | <i>Valenciennea sexguttata</i>     | Seine net |
| IFBIO | IFBIO1239-18 | S0075_003 | BOLD:AAC1521 | 612[2n] | <i>Lethrinus</i>                   | Seine net |
| IFBIO | IFBIO1241-18 | S0076_003 | BOLD:AAC1521 | 609[0n] | <i>Lethrinus</i>                   | Seine net |
| IFBIO | IFBIO124-17  | S0004_018 | BOLD:AAZ4093 | 610[0n] | <i>Pteragogus</i>                  | Seine net |
| IFBIO | IFBIO1244-18 | S0076_001 | BOLD:AAC6496 | 609[0n] | <i>Platax orbicularis</i>          | Seine net |
| IFBIO | IFBIO1246-18 | S0076_006 | BOLD:ABZ7416 | 609[0n] | <i>Upeneus cf. vittatus</i>        | Seine net |
| IFBIO | IFBIO1248-18 | S0077_003 | BOLD:ABX6347 | 606[1n] | <i>Trachinocephalus</i>            | Seine net |
| IFBIO | IFBIO1249-18 | S0077_004 | BOLD:AAB5194 | 609[0n] | <i>Gymnocranius elongatus</i>      | Seine net |
| IFBIO | IFBIO1250-18 | S0077_002 | BOLD:AAB5716 | 606[0n] | <i>Heniochus acuminatus</i>        | Seine net |
| IFBIO | IFBIO1251-18 | S0077_001 | BOLD:AAU1214 | 609[0n] | Scorpaenidae                       | Seine net |
| IFBIO | IFBIO125-17  | S0032_021 | BOLD:AAZ4093 | 609[0n] | <i>Pteragogus</i>                  | Seine net |
| IFBIO | IFBIO1252-18 | S0078_002 | BOLD:AAA8168 | 609[0n] | <i>Lutjanus</i>                    | Seine net |
| IFBIO | IFBIO1253-18 | S0078_001 | BOLD:AAB5717 | 609[0n] | <i>Heniochus diphreutes</i>        | Seine net |
| IFBIO | IFBIO1254-18 | S0078_006 | BOLD:ACY6212 | 609[0n] | Platycephalidae                    | Seine net |
| IFBIO | IFBIO1255-18 | S0078_005 | BOLD:AAC8078 | 612[0n] | <i>Lethrinus</i>                   | Seine net |
| IFBIO | IFBIO1257-18 | S0078_004 | BOLD:AAB0511 | 621[5n] | <i>Lethrinus</i> BOLDAAB0511       | Seine net |
| IFBIO | IFBIO126-17  | S0004_072 | BOLD:AAC3195 | 652[0n] | <i>Oxycheilinus</i>                | Seine net |
| IFBIO | IFBIO127-17  | S0015_028 | BOLD:AAC3195 | 651[0n] | <i>Oxycheilinus</i>                | Seine net |
| IFBIO | IFBIO128-17  | S0004_084 | BOLD:AAC3195 | 652[0n] | <i>Oxycheilinus</i>                | Seine net |
| IFBIO | IFBIO129-17  | S0006_032 | BOLD:AAC3195 | 649[0n] | <i>Oxycheilinus</i>                | Seine net |
| IFBIO | IFBIO130-17  | S0008_006 | BOLD:ADI3844 | 649[0n] | Labridae                           | Seine net |
| IFBIO | IFBIO131-17  | S0010_026 | BOLD:AAC3195 | 609[0n] | <i>Oxycheilinus</i>                | Seine net |
| IFBIO | IFBIO132-17  | S0018_003 | BOLD:AAC3195 | 648[0n] | <i>Oxycheilinus</i>                | Seine net |
| IFBIO | IFBIO133-17  | S0021_007 | BOLD:AAC3195 | 651[0n] | <i>Oxycheilinus</i>                | Seine net |
| IFBIO | IFBIO134-17  | S0027_003 | BOLD:AAC3195 | 648[0n] | <i>Oxycheilinus</i>                | Seine net |

|       |             |           |              |         |                                    |           |
|-------|-------------|-----------|--------------|---------|------------------------------------|-----------|
| IFBIO | IFBIO135-17 | S0032_012 | BOLD:AAC3195 | 650[0n] | <i>Oxycheilinus</i>                | Seine net |
| IFBIO | IFBIO137-17 | S0006_010 | BOLD:AAD8577 | 610[0n] | <i>Novaculoides macrolepidotus</i> | Seine net |
| IFBIO | IFBIO138-17 | S0006_030 | BOLD:AAD8577 | 613[0n] | <i>Novaculoides macrolepidotus</i> | Seine net |
| IFBIO | IFBIO139-17 | S0006_014 | BOLD:AAD8577 | 613[0n] | <i>Novaculoides macrolepidotus</i> | Seine net |
| IFBIO | IFBIO140-17 | S0006_016 | BOLD:AAD8577 | 613[0n] | <i>Novaculoides macrolepidotus</i> | Seine net |
| IFBIO | IFBIO141-17 | S0008_038 | BOLD:AAC5565 | 648[0n] | <i>Lagocephalus</i>                | Seine net |
| IFBIO | IFBIO142-17 | S0013_014 | BOLD:ACG8806 | 649[0n] | <i>Equulites klunzingeri</i>       | Seine net |
| IFBIO | IFBIO143-17 | S0001_004 | BOLD:AAD4765 | 652[0n] | <i>Calotomus spinidens</i>         | Seine net |
| IFBIO | IFBIO144-17 | S0001_005 | BOLD:AAD4765 | 609[0n] | <i>Calotomus spinidens</i>         | Seine net |
| IFBIO | IFBIO145-17 | S0001_006 | BOLD:AAD4765 | 652[0n] | <i>Calotomus spinidens</i>         | Seine net |
| IFBIO | IFBIO146-17 | S0002_029 | BOLD:AAD4765 | 650[0n] | <i>Calotomus spinidens</i>         | Seine net |
| IFBIO | IFBIO147-17 | S0003_020 | BOLD:AAD4765 | 652[0n] | <i>Calotomus spinidens</i>         | Seine net |
| IFBIO | IFBIO149-17 | S0004_004 | BOLD:AAD4765 | 648[0n] | <i>Calotomus spinidens</i>         | Seine net |
| IFBIO | IFBIO150-17 | S0004_027 | BOLD:AAD4765 | 652[0n] | <i>Calotomus spinidens</i>         | Seine net |
| IFBIO | IFBIO151-17 | S0005_044 | BOLD:AAD4765 | 652[0n] | <i>Calotomus spinidens</i>         | Seine net |
| IFBIO | IFBIO152-17 | S0010_028 | BOLD:AAD4765 | 648[0n] | <i>Calotomus spinidens</i>         | Seine net |
| IFBIO | IFBIO153-17 | S0014_011 | BOLD:AAD4765 | 648[0n] | <i>Calotomus spinidens</i>         | Seine net |
| IFBIO | IFBIO155-17 | S0019_018 | BOLD:AAD4765 | 651[0n] | <i>Calotomus spinidens</i>         | Seine net |
| IFBIO | IFBIO156-17 | S0021_006 | BOLD:AAD4765 | 651[0n] | <i>Calotomus spinidens</i>         | Seine net |
| IFBIO | IFBIO158-17 | S0001_031 | BOLD:AAB0511 | 600[0n] | <i>Lethrinus</i> BOLDAAB0511       | Seine net |
| IFBIO | IFBIO159-17 | S0002_021 | BOLD:ABY6363 | 613[0n] | <i>Lethrinus</i>                   | Seine net |
| IFBIO | IFBIO161-17 | S0003_015 | BOLD:AAB0511 | 600[0n] | <i>Lethrinus</i> BOLDAAB0511       | Seine net |
| IFBIO | IFBIO164-17 | S0013_001 | BOLD:ABZ0131 | 609[0n] | <i>Lethrinus</i>                   | Seine net |
| IFBIO | IFBIO165-17 | S0013_006 | BOLD:AAB4186 | 612[0n] | <i>Cheilinus</i>                   | Seine net |
| IFBIO | IFBIO166-17 | S0014_010 | BOLD:ADI4867 | 609[0n] | <i>Lethrinus</i>                   | Seine net |
| IFBIO | IFBIO167-17 | S0015_017 | BOLD:AAB0511 | 609[0n] | <i>Lethrinus</i> BOLDAAB0511       | Seine net |
| IFBIO | IFBIO168-17 | S0003_014 | BOLD:ABY6363 | 613[0n] | <i>Lethrinus</i>                   | Seine net |
| IFBIO | IFBIO169-17 | S0005_053 | BOLD:AAB0511 | 609[0n] | <i>Lethrinus</i> BOLDAAB0511       | Seine net |
| IFBIO | IFBIO170-17 | S0001_002 | BOLD:AAB0511 | 603[0n] | <i>Lethrinus</i> BOLDAAB0511       | Seine net |
| IFBIO | IFBIO171-17 | S0028_004 | BOLD:AAB0511 | 609[0n] | <i>Lethrinus</i> BOLDAAB0511       | Seine net |
| IFBIO | IFBIO172-17 | S0019_035 | BOLD:AAC1521 | 612[0n] | <i>Lethrinus</i>                   | Seine net |
| IFBIO | IFBIO173-17 | S0025_003 | BOLD:AAC1521 | 615[0n] | <i>Lethrinus</i>                   | Seine net |
| IFBIO | IFBIO174-17 | S0032_020 | BOLD:AAC1521 | 612[0n] | <i>Lethrinus</i>                   | Seine net |
| IFBIO | IFBIO175-17 | S0033_005 | BOLD:AAC1521 | 615[0n] | <i>Lethrinus</i>                   | Seine net |
| IFBIO | IFBIO176-17 | S0009_017 | BOLD:AAB0511 | 612[0n] | <i>Lethrinus</i> BOLDAAB0511       | Seine net |
| IFBIO | IFBIO177-17 | S0019_019 | BOLD:AAB0511 | 612[0n] | <i>Lethrinus</i> BOLDAAB0511       | Seine net |
| IFBIO | IFBIO178-17 | S0013_012 | BOLD:AAC8078 | 648[0n] | <i>Lethrinus</i>                   | Seine net |
| IFBIO | IFBIO179-17 | S0035_011 | BOLD:AAC1546 | 612[0n] | <i>Lethrinus xanthochilus</i>      | Seine net |
| IFBIO | IFBIO180-17 | S0004_011 | BOLD:AAB0511 | 609[0n] | <i>Lethrinus</i> BOLDAAB0511       | Seine net |
| IFBIO | IFBIO181-17 | S0032_011 | BOLD:ADI2486 | 603[0n] | <i>Lethrinus</i>                   | Seine net |
| IFBIO | IFBIO182-17 | S0035_016 | BOLD:AAB6438 | 609[0n] | <i>Lethrinus mahsena</i>           | Seine net |
| IFBIO | IFBIO183-17 | S0034_004 | BOLD:ABZ0131 | 612[0n] | <i>Lethrinus</i>                   | Seine net |
| IFBIO | IFBIO184-17 | S0034_007 | BOLD:ABZ0131 | 618[0n] | <i>Lethrinus</i>                   | Seine net |

|       |             |           |              |         |                                   |           |
|-------|-------------|-----------|--------------|---------|-----------------------------------|-----------|
| IFBIO | IFBIO185-17 | S0004_080 | BOLD:ABY6363 | 616[0n] | <i>Lethrinus</i>                  | Seine net |
| IFBIO | IFBIO187-17 | S0033_010 | BOLD:ABZ0131 | 609[0n] | <i>Lethrinus</i>                  | Seine net |
| IFBIO | IFBIO188-17 | S0033_009 | BOLD:AAB0511 | 618[0n] | <i>Lethrinus</i> BOLDAAB0511      | Seine net |
| IFBIO | IFBIO189-17 | S0014_015 | BOLD:AAB6438 | 612[0n] | <i>Lethrinus mahsena</i>          | Seine net |
| IFBIO | IFBIO190-17 | S0034_005 | BOLD:AAB6438 | 612[0n] | <i>Lethrinus mahsena</i>          | Seine net |
| IFBIO | IFBIO191-17 | S0001_021 | BOLD:AAH9156 | 645[0n] | <i>Plectorhinchus gaterinus</i>   | Seine net |
| IFBIO | IFBIO192-17 | S0001_028 | BOLD:AAC1635 | 609[0n] | <i>Naso brevirostris</i>          | Seine net |
| IFBIO | IFBIO195-17 | S0001_052 | BOLD:AAE6132 | 594[0n] | <i>Petroscirtes</i>               | Seine net |
| IFBIO | IFBIO196-17 | S0002_003 | BOLD:AAI6160 | 612[0n] | <i>Papilloculiceps longiceps</i>  | Seine net |
| IFBIO | IFBIO197-17 | S0002_005 | BOLD:ADI5215 | 609[4n] | <i>Pseudochromis</i>              | Seine net |
| IFBIO | IFBIO198-17 | S0002_011 | BOLD:AAB2590 | 594[0n] | <i>Parupeneus</i>                 | Seine net |
| IFBIO | IFBIO199-17 | S0002_040 | BOLD:ACF3921 | 612[0n] | <i>Plotosus</i>                   | Seine net |
| IFBIO | IFBIO200-17 | S0002_046 | BOLD:AAH0503 | 612[0n] | <i>Saurida</i>                    | Seine net |
| IFBIO | IFBIO201-17 | S0003_011 | BOLD:AAB8901 | 597[0n] | <i>Scarus psittacus</i>           | Seine net |
| IFBIO | IFBIO202-17 | S0004_015 | BOLD:AAZ4093 | 612[0n] | <i>Pteragogus</i>                 | Seine net |
| IFBIO | IFBIO204-17 | S0004_036 | BOLD:ABY6363 | 609[0n] | <i>Lethrinus</i>                  | Seine net |
| IFBIO | IFBIO205-17 | S0004_049 | BOLD:AAI6160 | 609[0n] | <i>Papilloculiceps longiceps</i>  | Seine net |
| IFBIO | IFBIO206-17 | S0004_053 | BOLD:AAE6131 | 600[0n] | <i>Petroscirtes</i>               | Seine net |
| IFBIO | IFBIO207-17 | S0004_057 | BOLD:AAD4765 | 648[0n] | <i>Calotomus spinidens</i>        | Seine net |
| IFBIO | IFBIO208-17 | S0004_061 | BOLD:AAB2590 | 615[0n] | <i>Parupeneus</i>                 | Seine net |
| IFBIO | IFBIO209-17 | S0004_063 | BOLD:AAI6357 | 648[0n] | <i>Paramonacanthus frenatus</i>   | Seine net |
| IFBIO | IFBIO210-17 | S0004_075 | BOLD:AAB1643 | 648[0n] | <i>Priacanthus hamrur</i>         | Seine net |
| IFBIO | IFBIO211-17 | S0004_078 | BOLD:AAC1405 | 603[0n] | <i>Parupeneus rubescens</i>       | Seine net |
| IFBIO | IFBIO212-17 | S0001_011 | BOLD:AAD0849 | 612[0n] | <i>Scarus</i>                     | Seine net |
| IFBIO | IFBIO214-17 | S0004_091 | BOLD:AAC1635 | 612[0n] | <i>Naso brevirostris</i>          | Seine net |
| IFBIO | IFBIO215-17 | S0004_094 | BOLD:ACF3921 | 612[0n] | <i>Plotosus</i>                   | Seine net |
| IFBIO | IFBIO216-17 | S0005_008 | BOLD:AAH9156 | 648[0n] | <i>Plectorhinchus gaterinus</i>   | Seine net |
| IFBIO | IFBIO217-17 | S0005_025 | BOLD:AAI3160 | 648[0n] | <i>Neopomacentrus fuliginosus</i> | Seine net |
| IFBIO | IFBIO218-17 | S0005_027 | BOLD:AAB0511 | 603[0n] | <i>Lethrinus</i> BOLDAAB0511      | Seine net |
| IFBIO | IFBIO219-17 | S0005_048 | BOLD:AAE6131 | 612[0n] | <i>Petroscirtes</i>               | Seine net |
| IFBIO | IFBIO220-17 | S0005_067 | BOLD:AAI6160 | 612[0n] | <i>Papilloculiceps longiceps</i>  | Seine net |
| IFBIO | IFBIO221-17 | S0006_031 | BOLD:AAH0503 | 612[0n] | <i>Saurida</i>                    | Seine net |
| IFBIO | IFBIO222-17 | S0006_047 | BOLD:AAI6160 | 612[0n] | <i>Papilloculiceps longiceps</i>  | Seine net |
| IFBIO | IFBIO223-17 | S0006_050 | BOLD:ACY6212 | 645[0n] | Platycephalidae                   | Seine net |
| IFBIO | IFBIO224-17 | S0007_001 | BOLD:ACF0223 | 651[0n] | <i>Parupeneus macronemus</i>      | Seine net |
| IFBIO | IFBIO225-17 | S0007_004 | BOLD:AAF7731 | 615[0n] | <i>Lutjanus notatus</i>           | Seine net |
| IFBIO | IFBIO226-17 | S0007_010 | BOLD:AAY3550 | 609[0n] | <i>Pomacentrus trilineatus</i>    | Seine net |
| IFBIO | IFBIO227-17 | S0007_013 | BOLD:AAH0503 | 612[0n] | <i>Saurida</i>                    | Seine net |
| IFBIO | IFBIO228-17 | S0007_014 | BOLD:AAC2246 | 612[0n] | <i>Ostracion cubicus</i>          | Seine net |
| IFBIO | IFBIO229-17 | S0007_026 | BOLD:AAH9156 | 648[0n] | <i>Plectorhinchus gaterinus</i>   | Seine net |
| IFBIO | IFBIO230-17 | S0007_027 | BOLD:AAB0511 | 609[0n] | <i>Lethrinus</i> BOLDAAB0511      | Seine net |
| IFBIO | IFBIO231-17 | S0007_031 | BOLD:AAB1643 | 645[0n] | <i>Priacanthus hamrur</i>         | Seine net |
| IFBIO | IFBIO232-17 | S0035_018 | BOLD:AAB6438 | 609[0n] | <i>Lethrinus mahsena</i>          | Seine net |
| IFBIO | IFBIO233-17 | S0007_035 | BOLD:AAB8901 | 609[0n] | <i>Scarus psittacus</i>           | Seine net |



|       |             |           |              |         |                                      |           |
|-------|-------------|-----------|--------------|---------|--------------------------------------|-----------|
| IFBIO | IFBIO234-17 | S0007_036 | BOLD:ABY4451 | 600[0n] | <i>Scarus</i>                        | Seine net |
| IFBIO | IFBIO235-17 | S0007_044 | BOLD:ACK8109 | 609[0n] | <i>Abudefduf</i>                     | Seine net |
| IFBIO | IFBIO236-17 | S0008_014 | BOLD:AAB6438 | 612[0n] | <i>Lethrinus mahsena</i>             | Seine net |
| IFBIO | IFBIO237-17 | S0008_015 | BOLD:AAF8776 | 612[0n] | <i>Parupeneus fraserorum</i>         | Seine net |
| IFBIO | IFBIO238-17 | S0008_044 | BOLD:AAD6266 | 651[0n] | <i>Parupeneus pleurostigma</i>       | Seine net |
| IFBIO | IFBIO240-17 | S0009_015 | BOLD:ABY4451 | 600[0n] | <i>Scarus</i>                        | Seine net |
| IFBIO | IFBIO241-17 | S0009_019 | BOLD:AAI6160 | 612[0n] | <i>Papilloculiceps longiceps</i>     | Seine net |
| IFBIO | IFBIO242-17 | S0009_021 | BOLD:AAB1643 | 648[0n] | <i>Priacanthus hamrur</i>            | Seine net |
| IFBIO | IFBIO243-17 | S0009_025 | BOLD:AAY3550 | 609[0n] | <i>Pomacentrus trilineatus</i>       | Seine net |
| IFBIO | IFBIO244-17 | S0010_004 | BOLD:AAC4020 | 612[0n] | <i>Plectorhinchus flavomaculatus</i> | Seine net |
| IFBIO | IFBIO245-17 | S0012_013 | BOLD:AAI6160 | 612[0n] | <i>Papilloculiceps longiceps</i>     | Seine net |
| IFBIO | IFBIO246-17 | S0012_021 | BOLD:AAC4020 | 612[0n] | <i>Plectorhinchus flavomaculatus</i> | Seine net |
| IFBIO | IFBIO247-17 | S0012_023 | BOLD:AAB5980 | 612[0n] | <i>Parupeneus</i>                    | Seine net |
| IFBIO | IFBIO248-17 | S0013_008 | BOLD:AAB0334 | 612[0n] | <i>Parupeneus indicus</i>            | Seine net |
| IFBIO | IFBIO249-17 | S0013_015 | BOLD:AAB5980 | 612[0n] | <i>Parupeneus</i>                    | Seine net |
| IFBIO | IFBIO250-17 | S0014_006 | BOLD:AAB2590 | 615[0n] | <i>Parupeneus</i>                    | Seine net |
| IFBIO | IFBIO251-17 | S0014_012 | BOLD:AAB6438 | 609[0n] | <i>Lethrinus mahsena</i>             | Seine net |
| IFBIO | IFBIO252-17 | S0014_013 | BOLD:AAC4020 | 612[0n] | <i>Plectorhinchus flavomaculatus</i> | Seine net |
| IFBIO | IFBIO253-17 | S0014_018 | BOLD:AAB5978 | 615[0n] | <i>Parupeneus</i>                    | Seine net |
| IFBIO | IFBIO254-17 | S0014_023 | BOLD:AAY3550 | 609[0n] | <i>Pomacentrus trilineatus</i>       | Seine net |
| IFBIO | IFBIO255-17 | S0015_009 | BOLD:AAB2590 | 615[0n] | <i>Parupeneus</i>                    | Seine net |
| IFBIO | IFBIO256-17 | S0015_010 | BOLD:AAH0503 | 609[0n] | <i>Saurida</i>                       | Seine net |
| IFBIO | IFBIO258-17 | S0015_020 | BOLD:AAB6469 | 612[0n] | <i>Upeneus moluccensis</i>           | Seine net |
| IFBIO | IFBIO259-17 | S0015_029 | BOLD:AAZ4093 | 612[0n] | <i>Pteragogus</i>                    | Seine net |
| IFBIO | IFBIO261-17 | S0016_004 | BOLD:ADF5681 | 612[0n] | <i>Lutjanus fulviflamma</i>          | Seine net |
| IFBIO | IFBIO262-17 | S0018_005 | BOLD:AAB2592 | 594[4n] | <i>Mulloidichthys flavolineatus</i>  | Seine net |
| IFBIO | IFBIO263-17 | S0019_022 | BOLD:ADF5681 | 612[0n] | <i>Lutjanus fulviflamma</i>          | Seine net |
| IFBIO | IFBIO265-17 | S0019_030 | BOLD:AAB6438 | 609[0n] | <i>Lethrinus mahsena</i>             | Seine net |
| IFBIO | IFBIO266-17 | S0019_033 | BOLD:AAB5980 | 612[0n] | <i>Parupeneus</i>                    | Seine net |
| IFBIO | IFBIO267-17 | S0020_004 | BOLD:AAB2592 | 582[3n] | <i>Mulloidichthys flavolineatus</i>  | Seine net |
| IFBIO | IFBIO268-17 | S0020_007 | BOLD:AAC1635 | 609[0n] | <i>Naso brevirostris</i>             | Seine net |
| IFBIO | IFBIO269-17 | S0021_002 | BOLD:AAB1643 | 648[0n] | <i>Priacanthus hamrur</i>            | Seine net |
| IFBIO | IFBIO270-17 | S0022_003 | BOLD:AAI6160 | 612[0n] | <i>Papilloculiceps longiceps</i>     | Seine net |
| IFBIO | IFBIO272-17 | S0022_007 | BOLD:AAZ4093 | 612[0n] | <i>Pteragogus</i>                    | Seine net |
| IFBIO | IFBIO274-17 | S0025_002 | BOLD:AAD6249 | 597[0n] | <i>Scolopsis bimaculata</i>          | Seine net |
| IFBIO | IFBIO275-17 | S0026_004 | BOLD:ADI5215 | 612[0n] | <i>Pseudochromis</i>                 | Seine net |
| IFBIO | IFBIO276-17 | S0028_006 | BOLD:AAI6160 | 612[0n] | <i>Papilloculiceps longiceps</i>     | Seine net |
| IFBIO | IFBIO277-17 | S0030_001 | BOLD:AAC1406 | 651[0n] | <i>Upeneus pori</i>                  | Seine net |
| IFBIO | IFBIO278-17 | S0031_008 | BOLD:AAY3550 | 642[0n] | <i>Pomacentrus trilineatus</i>       | Seine net |
| IFBIO | IFBIO279-17 | S0031_013 | BOLD:AAF7731 | 651[0n] | <i>Lutjanus notatus</i>              | Seine net |
| IFBIO | IFBIO280-17 | S0031_014 | BOLD:AAI3160 | 648[0n] | <i>Neopomacentrus fuliginosus</i>    | Seine net |
| IFBIO | IFBIO281-17 | S0032_014 | BOLD:AAB2590 | 651[0n] | <i>Parupeneus</i>                    | Seine net |
| IFBIO | IFBIO282-17 | S0032_017 | BOLD:AAB2590 | 651[0n] | <i>Parupeneus</i>                    | Seine net |

|       |             |           |              |         |                                   |           |
|-------|-------------|-----------|--------------|---------|-----------------------------------|-----------|
| IFBIO | IFBIO283-17 | S0034_001 | BOLD:AAA9700 | 651[0n] | <i>Pelates quadrilineatus</i>     | Seine net |
| IFBIO | IFBIO284-17 | S0035_004 | BOLD:AAD6266 | 648[0n] | <i>Parupeneus pleurostigma</i>    | Seine net |
| IFBIO | IFBIO286-17 | S0036_003 | BOLD:AAB6438 | 615[0n] | <i>Lethrinus mahsena</i>          | Seine net |
| IFBIO | IFBIO287-17 | S0003_024 | BOLD:AAD0849 | 612[0n] | <i>Scarus</i>                     | Seine net |
| IFBIO | IFBIO288-17 | S0007_028 | BOLD:AAD0849 | 615[0n] | <i>Scarus</i>                     | Seine net |
| IFBIO | IFBIO289-17 | S0008_053 | BOLD:ADI3252 | 612[0n] | Scaridae                          | Seine net |
| IFBIO | IFBIO290-17 | S0012_002 | BOLD:AAD0849 | 609[0n] | <i>Scarus</i>                     | Seine net |
| IFBIO | IFBIO291-17 | S0028_005 | BOLD:AAD0849 | 618[0n] | <i>Scarus</i>                     | Seine net |
| IFBIO | IFBIO293-17 | S0001_039 | BOLD:AAD0849 | 597[0n] | <i>Scarus</i>                     | Seine net |
| IFBIO | IFBIO294-17 | S0003_006 | BOLD:AAD0849 | 612[0n] | <i>Scarus</i>                     | Seine net |
| IFBIO | IFBIO295-17 | S0019_025 | BOLD:AAD0849 | 618[0n] | <i>Scarus</i>                     | Seine net |
| IFBIO | IFBIO296-17 | S0031_020 | BOLD:AAD0849 | 609[0n] | <i>Scarus</i>                     | Seine net |
| IFBIO | IFBIO297-17 | S0010_020 | BOLD:AAD0849 | 609[0n] | <i>Scarus</i>                     | Seine net |
| IFBIO | IFBIO298-17 | S0007_020 | BOLD:AAB8901 | 609[0n] | <i>Scarus psittacus</i>           | Seine net |
| IFBIO | IFBIO300-17 | S0001_055 | BOLD:AAD0849 | 594[0n] | <i>Scarus</i>                     | Seine net |
| IFBIO | IFBIO301-17 | S0004_030 | BOLD:AAD4765 | 651[0n] | <i>Calotomus spinidens</i>        | Seine net |
| IFBIO | IFBIO303-17 | S0011_010 | BOLD:AAC4767 | 612[0n] | <i>Scolopsis ghanam</i>           | Seine net |
| IFBIO | IFBIO304-17 | S0018_006 | BOLD:AAC4767 | 612[0n] | <i>Scolopsis ghanam</i>           | Seine net |
| IFBIO | IFBIO305-17 | S0016_005 | BOLD:AAB0512 | 612[0n] | <i>Scomberoides lysan</i>         | Seine net |
| IFBIO | IFBIO306-17 | S0015_050 | BOLD:AAB0512 | 612[0n] | <i>Scomberoides lysan</i>         | Seine net |
| IFBIO | IFBIO308-17 | S0006_020 | BOLD:AAC4543 | 609[0n] | <i>Sebastapistes</i>              | Seine net |
| IFBIO | IFBIO309-17 | S0024_002 | BOLD:AAC4543 | 591[3n] | <i>Sebastapistes</i>              | Seine net |
| IFBIO | IFBIO310-17 | S0001_054 | BOLD:AAC4543 | 609[0n] | <i>Sebastapistes</i>              | Seine net |
| IFBIO | IFBIO311-17 | S0025_005 | BOLD:AAC4543 | 609[0n] | <i>Sebastapistes</i>              | Seine net |
| IFBIO | IFBIO313-17 | S0036_001 | BOLD:AAC4543 | 609[0n] | <i>Sebastapistes</i>              | Seine net |
| IFBIO | IFBIO314-17 | S0032_002 | BOLD:ACG8874 | 649[0n] | <i>Solenostomus cyanopterus</i>   | Seine net |
| IFBIO | IFBIO315-17 | S0001_044 | BOLD:ACV9716 | 612[0n] | <i>Sphyraena</i>                  | Seine net |
| IFBIO | IFBIO316-17 | S0002_013 | BOLD:AAC2336 | 633[0n] | <i>Stethojulis interrupta</i>     | Seine net |
| IFBIO | IFBIO317-17 | S0003_013 | BOLD:AAC2336 | 649[0n] | <i>Stethojulis interrupta</i>     | Seine net |
| IFBIO | IFBIO318-17 | S0004_032 | BOLD:AAC2336 | 651[0n] | <i>Stethojulis interrupta</i>     | Seine net |
| IFBIO | IFBIO320-17 | S0002_032 | BOLD:ADI2646 | 588[0n] | <i>Stethojulis</i>                | Seine net |
| IFBIO | IFBIO323-17 | S0002_002 | BOLD:AAC4148 | 606[0n] | <i>Tylosurus</i>                  | Seine net |
| IFBIO | IFBIO334-17 | S0004_054 | BOLD:ADG5410 | 609[0n] | Syngnathidae                      | Seine net |
| IFBIO | IFBIO335-17 | S0007_017 | BOLD:ADI1740 | 612[0n] | Syngnathidae                      | Seine net |
| IFBIO | IFBIO338-17 | S0005_019 | BOLD:ADI1740 | 618[0n] | Syngnathidae                      | Seine net |
| IFBIO | IFBIO339-17 | S0017_001 | BOLD:ADG5410 | 612[0n] | Syngnathidae                      | Seine net |
| IFBIO | IFBIO340-17 | S0009_034 | BOLD:ADI1740 | 615[0n] | Syngnathidae                      | Seine net |
| IFBIO | IFBIO341-17 | S0008_048 | BOLD:AAG3690 | 612[0n] | <i>Torquigener flavimaculosus</i> | Seine net |
| IFBIO | IFBIO343-17 | S0005_012 | BOLD:ABX6347 | 612[0n] | <i>Trachinocephalus</i>           | Seine net |
| IFBIO | IFBIO344-17 | S0008_040 | BOLD:AAC4148 | 609[0n] | <i>Tylosurus</i>                  | Seine net |
| IFBIO | IFBIO345-17 | S0015_019 | BOLD:ACV4665 | 612[0n] | <i>Upeneus</i>                    | Seine net |
| IFBIO | IFBIO346-17 | S0022_011 | BOLD:ABZ7416 | 615[0n] | <i>Upeneus cf. vittatus</i>       | Seine net |
| IFBIO | IFBIO347-17 | S0022_006 | BOLD:AAB9714 | 648[0n] | <i>Upeneus</i> BOLDAAB9714        | Seine net |
| IFBIO | IFBIO348-17 | S0023_004 | BOLD:AAH7551 | 651[0n] | <i>Upeneus</i>                    | Seine net |
| IFBIO | IFBIO349-17 | S0001_007 | BOLD:AAF6311 | 648[0n] | <i>Zebrasoma</i>                  | Seine net |

|       |             |           |              |         |                                          |           |
|-------|-------------|-----------|--------------|---------|------------------------------------------|-----------|
| IFBIO | IFBIO382-17 | S0006_029 | BOLD:AAF8834 | 606[0n] | <i>Ablabys binotatus</i>                 | Seine net |
| IFBIO | IFBIO391-17 | S0035_008 | BOLD:AAE4046 | 609[0n] | <i>Acanthurus dussumieri</i>             | Seine net |
| IFBIO | IFBIO393-17 | S0031_012 | BOLD:AAC6467 | 612[0n] | <i>Acanthurus xanthopterus</i>           | Seine net |
| IFBIO | IFBIO399-17 | S0026_002 | BOLD:AAB8727 | 609[0n] | <i>Amblygobius</i>                       | Seine net |
| IFBIO | IFBIO408-17 | S0007_012 | BOLD:ACV9601 | 609[0n] | <i>Ostorhinchus</i>                      | Seine net |
| IFBIO | IFBIO409-17 | S0010_001 | BOLD:ACV9601 | 609[0n] | <i>Ostorhinchus</i>                      | Seine net |
| IFBIO | IFBIO415-17 | S0016_016 | BOLD:AAC9155 | 609[1n] | <i>Bothus pantherinus</i>                | Seine net |
| IFBIO | IFBIO422-17 | S0009_002 | BOLD:AAD2222 | 609[0n] | <i>Canthigaster</i>                      | Seine net |
| IFBIO | IFBIO426-17 | S0015_049 | BOLD:AAB0585 | 609[0n] | <i>Caranx melampygus</i>                 | Seine net |
| IFBIO | IFBIO431-17 | S0035_007 | BOLD:AAB7102 | 603[3n] | <i>Chaetodon trifasciatus</i>            | Seine net |
| IFBIO | IFBIO457-17 | S0007_005 | BOLD:AAD4477 | 612[0n] | <i>Diagramma</i>                         | Seine net |
| IFBIO | IFBIO458-17 | S0008_025 | BOLD:AAD4477 | 609[0n] | <i>Diagramma</i>                         | Seine net |
| IFBIO | IFBIO486-17 | S0032_003 | BOLD:AAD6249 | 609[1n] | <i>Scolopsis bimaculata</i>              | Seine net |
| IFBIO | IFBIO489-17 | S0006_034 | BOLD:AAC3195 | 612[2n] | <i>Oxycheilinus</i>                      | Seine net |
| IFBIO | IFBIO491-17 | S0008_012 | BOLD:AAD8577 | 609[0n] | <i>Novaculoides<br/>macrolepidotus</i>   | Seine net |
| IFBIO | IFBIO493-17 | S0011_002 | BOLD:AAD8577 | 609[0n] | <i>Novaculoides<br/>macrolepidotus</i>   | Seine net |
| IFBIO | IFBIO496-17 | S0005_002 | BOLD:AAB2988 | 609[0n] | <i>Lactoria cornuta</i>                  | Seine net |
| IFBIO | IFBIO499-17 | S0007_032 | BOLD:AAB2988 | 609[0n] | <i>Lactoria cornuta</i>                  | Seine net |
| IFBIO | IFBIO501-17 | S0005_015 | BOLD:AAB2988 | 609[0n] | <i>Lactoria cornuta</i>                  | Seine net |
| IFBIO | IFBIO502-17 | S0006_007 | BOLD:AAF2668 | 609[0n] | <i>Lactoria</i>                          | Seine net |
| IFBIO | IFBIO525-17 | S0010_025 | BOLD:ABY6363 | 609[0n] | <i>Lethrinus</i>                         | Seine net |
| IFBIO | IFBIO526-17 | S0028_003 | BOLD:AAC1521 | 612[0n] | <i>Lethrinus</i>                         | Seine net |
| IFBIO | IFBIO528-17 | S0019_023 | BOLD:AAB0511 | 597[0n] | <i>Lethrinus</i> BOLDAAB0511             | Seine net |
| IFBIO | IFBIO529-17 | S0019_020 | BOLD:AAC8078 | 612[0n] | <i>Lethrinus</i>                         | Seine net |
| IFBIO | IFBIO530-17 | S0031_017 | BOLD:AAC8078 | 612[0n] | <i>Lethrinus</i>                         | Seine net |
| IFBIO | IFBIO531-17 | S0033_007 | BOLD:AAC8078 | 612[0n] | <i>Lethrinus</i>                         | Seine net |
| IFBIO | IFBIO533-17 | S0005_018 | BOLD:ABY6363 | 609[0n] | <i>Lethrinus</i>                         | Seine net |
| IFBIO | IFBIO534-17 | S0033_008 | BOLD:ABZ0131 | 609[0n] | <i>Lethrinus</i>                         | Seine net |
| IFBIO | IFBIO539-17 | S0035_017 | BOLD:AAB6438 | 609[0n] | <i>Lethrinus mahsena</i>                 | Seine net |
| IFBIO | IFBIO541-17 | S0026_005 | BOLD:AAC1547 | 547[2n] | <i>Lethrinus</i>                         | Seine net |
| IFBIO | IFBIO548-17 | S0032_007 | BOLD:ADN0684 | 627[3n] | Mullidae                                 | Seine net |
| IFBIO | IFBIO557-17 | S0028_010 | BOLD:AAC1635 | 609[0n] | <i>Naso brevirostris</i>                 | Seine net |
| IFBIO | IFBIO559-17 | S0009_030 | BOLD:AAI3160 | 612[0n] | <i>Neopomacentrus<br/>fuliginosus</i>    | Seine net |
| IFBIO | IFBIO561-17 | S0008_054 | BOLD:AAC2246 | 612[0n] | <i>Ostracion cubicus</i>                 | Seine net |
| IFBIO | IFBIO586-17 | S0025_004 | BOLD:AAC6496 | 609[0n] | <i>Platax orbicularis</i>                | Seine net |
| IFBIO | IFBIO587-17 | S0023_001 | BOLD:AAC5812 | 609[0n] | <i>Platax teira</i>                      | Seine net |
| IFBIO | IFBIO590-17 | S0010_014 | BOLD:AAC4020 | 612[0n] | <i>Plectorhinchus<br/>flavomaculatus</i> | Seine net |
| IFBIO | IFBIO597-17 | S0002_041 | BOLD:ACF3921 | 612[0n] | <i>Plotosus</i>                          | Seine net |
| IFBIO | IFBIO616-17 | S0032_015 | BOLD:ABY4451 | 579[2n] | <i>Scarus</i>                            | Seine net |
| IFBIO | IFBIO635-17 | S0023_007 | BOLD:AAB0512 | 606[0n] | <i>Scomberoides lysan</i>                | Seine net |
| IFBIO | IFBIO636-17 | S0012_011 | BOLD:AAC4543 | 609[0n] | <i>Sebastapistes</i>                     | Seine net |
| IFBIO | IFBIO638-17 | S0004_064 | BOLD:AAC4543 | 609[0n] | <i>Sebastapistes</i>                     | Seine net |
| IFBIO | IFBIO639-17 | S0005_060 | BOLD:AAC4543 | 609[0n] | <i>Sebastapistes</i>                     | Seine net |

|       |             |           |              |         |                                   |           |
|-------|-------------|-----------|--------------|---------|-----------------------------------|-----------|
| IFBIO | IFBIO666-17 | S0011_005 | BOLD:AAC4148 | 609[0n] | <i>Tylosurus</i>                  | Seine net |
| IFBIO | IFBIO688-17 | S0015_004 | BOLD:AAD3585 | 612[0n] | <i>Aeoliscus punctulatus</i>      | Seine net |
| IFBIO | IFBIO695-17 | S0032_008 | BOLD:ACV9601 | 609[0n] | <i>Ostorhinchus</i>               | Seine net |
| IFBIO | IFBIO700-17 | S0020_001 | BOLD:AAD2222 | 609[0n] | <i>Canthigaster</i>               | Seine net |
| IFBIO | IFBIO708-17 | S0031_003 | BOLD:AAE1213 | 612[0n] | <i>Chaetodon xanthocephalus</i>   | Seine net |
| IFBIO | IFBIO721-17 | S0003_002 | BOLD:ABU8169 | 609[0n] | <i>Cheilodipterus</i>             | Seine net |
| IFBIO | IFBIO745-17 | S0007_024 | BOLD:AAB5716 | 609[0n] | <i>Heniochus acuminatus</i>       | Seine net |
| IFBIO | IFBIO752-17 | S0005_004 | BOLD:AAX0875 | 549[1n] | <i>Hippocampus camelopardalis</i> | Seine net |
| IFBIO | IFBIO756-17 | S0033_003 | BOLD:AAD6249 | 609[0n] | <i>Scolopsis bimaculata</i>       | Seine net |
| IFBIO | IFBIO769-17 | S0032_009 | BOLD:ABY6363 | 609[0n] | <i>Lethrinus</i>                  | Seine net |
| IFBIO | IFBIO770-17 | S0035_015 | BOLD:AAB0511 | 597[1n] | <i>Lethrinus</i> BOLDAAB0511      | Seine net |
| IFBIO | IFBIO777-17 | S0015_025 | BOLD:AAI3160 | 612[0n] | <i>Neopomacentrus fuliginosus</i> | Seine net |
| IFBIO | IFBIO796-17 | S0005_022 | BOLD:AAF8900 | 612[0n] | <i>Sphyræna cf. flavicauda</i>    | Seine net |
| IFBIO | IFBIO835-17 | S0009_022 | BOLD:AAB8729 | 609[0n] | <i>Acanthurus nigricauda</i>      | Seine net |
| IFBIO | IFBIO843-17 | S0002_066 | BOLD:AAB4823 | 615[0n] | <i>Caesio</i>                     | Seine net |
| IFBIO | IFBIO875-17 | S0013_013 | BOLD:ABY6363 | 609[0n] | <i>Lethrinus</i>                  | Seine net |
| IFBIO | IFBIO876-17 | S0015_018 | BOLD:AAC8078 | 612[0n] | <i>Lethrinus</i>                  | Seine net |
| IFBIO | IFBIO877-17 | S0021_008 | BOLD:AAC8078 | 612[0n] | <i>Lethrinus</i>                  | Seine net |
| IFBIO | IFBIO878-17 | S0032_010 | BOLD:AAC8078 | 612[0n] | <i>Lethrinus</i>                  | Seine net |
| IFBIO | IFBIO896-17 | S0010_015 | BOLD:AAC4543 | 609[0n] | <i>Sebastapistes</i>              | Seine net |
| IFBIO | IFBIO898-17 | S0005_062 | BOLD:AAC4543 | 609[0n] | <i>Sebastapistes</i>              | Seine net |
| IFBIO | IFBIO901-17 | S0035_005 | BOLD:AAD4824 | 609[0n] | <i>Stethojulis</i>                | Seine net |
| IFBIO | IFBIO912-17 | S0022_002 | BOLD:ACZ9919 | 649[0n] | <i>Epinephelus</i>                | Seine net |
| IFBIO | IFBIO915-17 | S0032_001 | BOLD:AAD1767 | 579[1n] | <i>Epinephelus</i>                | Seine net |
| IFBIO | IFBIO916-17 | S0036_004 | BOLD:ACZ9919 | 579[1n] | <i>Epinephelus</i>                | Seine net |
| IFBIO | IFBIO919-17 | S0021_001 | BOLD:AAB2341 | 609[0n] | <i>Siganus laqueus</i>            | Seine net |
| IFBIO | IFBIO923-17 | S0001_041 | BOLD:AAC6461 | 609[0n] | <i>Siganus argenteus</i>          | Seine net |
| IFBIO | IFBIO934-18 | S0037_001 | BOLD:AAC4543 | 609[0n] | <i>Sebastapistes</i>              | Seine net |
| IFBIO | IFBIO939-18 | S0038_004 | BOLD:AAF7654 | 609[0n] | <i>Halichoeres</i>                | Seine net |
| IFBIO | IFBIO940-18 | S0038_005 | BOLD:ADO3945 | 594[0n] | <i>Eurypegasus</i>                | Seine net |
| IFBIO | IFBIO941-18 | S0038_006 | BOLD:AAB0511 | 609[0n] | <i>Lethrinus</i> BOLDAAB0511      | Seine net |
| IFBIO | IFBIO942-18 | S0038_007 | BOLD:AAC1521 | 612[1n] | <i>Lethrinus</i>                  | Seine net |
| IFBIO | IFBIO944-18 | S0038_009 | BOLD:AAC0565 | 609[0n] | <i>Hyporhamphus</i>               | Seine net |
| IFBIO | IFBIO945-18 | S0038_010 | BOLD:AAC2336 | 609[0n] | <i>Stethojulis interrupta</i>     | Seine net |
| IFBIO | IFBIO946-18 | S0038_011 | BOLD:AAB6992 | 612[0n] | <i>Rhinecanthus aculeatus</i>     | Seine net |
| IFBIO | IFBIO949-18 | S0038_014 | BOLD:ADI1740 | 609[0n] | Syngnathidae                      | Seine net |
| IFBIO | IFBIO953-18 | S0039_001 | BOLD:AAD0784 | 609[0n] | <i>Plagiotremus tapeinosoma</i>   | Seine net |
| IFBIO | IFBIO954-18 | S0039_002 | BOLD:AAI6160 | 609[0n] | <i>Papilloculiceps longiceps</i>  | Seine net |
| IFBIO | IFBIO955-18 | S0039_003 | BOLD:AAC3195 | 609[0n] | <i>Oxycheilinus</i>               | Seine net |
| IFBIO | IFBIO956-18 | S0039_004 | BOLD:AAF0288 | 609[0n] | <i>Vanderhorstia</i>              | Seine net |
| IFBIO | IFBIO957-18 | S0039_005 | BOLD:AAC4543 | 609[0n] | Scorpaenidae                      | Seine net |
| IFBIO | IFBIO958-18 | S0039_006 | BOLD:AAC4543 | 609[0n] | <i>Sebastapistes</i>              | Seine net |
| IFBIO | IFBIO961-18 | S0039_009 | BOLD:AAC4542 | 609[0n] | <i>Sebastapistes</i>              | Seine net |
| IFBIO | IFBIO962-18 | S0039_010 | BOLD:ADM7122 | 612[0n] | <i>Parupeneus</i>                 | Seine net |

|       |             |           |              |         |                                        |            |
|-------|-------------|-----------|--------------|---------|----------------------------------------|------------|
| IFBIO | IFBIO963-18 | S0040_001 | BOLD:AAB9327 | 612[0n] | <i>Upeneus tragula</i>                 | Seine net  |
| IFBIO | IFBIO964-18 | S0040_002 | BOLD:AAC1405 | 609[0n] | <i>Parupeneus rubescens</i>            | Seine net  |
| IFBIO | IFBIO965-18 | S0040_003 | BOLD:AAD6266 | 612[0n] | <i>Parupeneus pleurostigma</i>         | Seine net  |
| IFBIO | IFBIO967-18 | S0040_005 | BOLD:ACF0223 | 612[0n] | <i>Parupeneus macronemus</i>           | Seine net  |
| IFBIO | IFBIO970-18 | S0040_008 | BOLD:AAD8577 | 609[0n] | <i>Novaculoides<br/>macrolepidotus</i> | Seine net  |
| IFBIO | IFBIO972-18 | S0040_010 | BOLD:AAB0511 | 609[0n] | <i>Lethrinus</i> BOLDAAB0511           | Seine net  |
| IFBIO | IFBIO974-18 | S0041_002 | BOLD:AAC1521 | 609[2n] | <i>Lethrinus</i>                       | Seine net  |
| IFBIO | IFBIO975-18 | S0041_003 | BOLD:AAB0511 | 609[0n] | <i>Lethrinus</i> BOLDAAB0511           | Seine net  |
| IFBIO | IFBIO977-18 | S0042_001 | BOLD:AAF7654 | 609[0n] | <i>Halichoeres</i>                     | Seine net  |
| IFBIO | IFBIO978-18 | S0042_003 | BOLD:AAF8776 | 612[0n] | <i>Parupeneus fraserorum</i>           | Seine net  |
| IFBIO | IFBIO979-18 | S0042_004 | BOLD:AAC1547 | 609[3n] | <i>Lethrinus</i>                       | Seine net  |
| IFBIO | IFBIO980-18 | S0042_005 | BOLD:AAB0511 | 597[1n] | <i>Lethrinus</i> BOLDAAB0511           | Seine net  |
| IFBIO | IFBIO981-18 | S0042_006 | BOLD:AAB0511 | 609[0n] | <i>Lethrinus</i> BOLDAAB0511           | Seine net  |
| IFBIO | IFBIO982-18 | S0042_007 | BOLD:AAB0511 | 609[1n] | <i>Lethrinus</i> BOLDAAB0511           | Seine net  |
| IFBIO | IFBIO983-18 | S0042_008 | BOLD:AAC2084 | 609[0n] | <i>Ostorhinchus</i>                    | Seine net  |
| IFBIO | IFBIO985-18 | S0042_010 | BOLD:AAC2841 | 612[0n] | <i>Chaetodon kleinii</i>               | Seine net  |
| IFBIO | IFBIO986-18 | S0043_006 | BOLD:AAB0511 | 609[0n] | <i>Lethrinus</i> BOLDAAB0511           | Seine net  |
| IFBIO | IFBIO988-18 | S0043_007 | BOLD:AAB0511 | 609[0n] | <i>Lethrinus</i> BOLDAAB0511           | Seine net  |
| IFBIO | IFBIO989-18 | S0043_001 | BOLD:ABY4451 | 582[3n] | <i>Scarus</i>                          | Seine net  |
| IFBIO | IFBIO990-18 | S0043_004 | BOLD:AAD8577 | 609[0n] | <i>Novaculoides<br/>macrolepidotus</i> | Seine net  |
| IFBIO | IFBIO993-18 | S0043_005 | BOLD:AAE4025 | 609[0n] | <i>Acanthurus mata</i>                 | Seine net  |
| IFBIO | IFBIO994-18 | S0043_010 | BOLD:AAI3160 | 612[0n] | <i>Neopomacentrus<br/>fuliginosus</i>  | Seine net  |
| IFBIO | IFBIO996-18 | S0043_011 | BOLD:AAI6160 | 612[0n] | <i>Papilloculiceps longiceps</i>       | Seine net  |
| IFBIO | IFBIO997-18 | S0044_002 | BOLD:ACF0223 | 612[0n] | <i>Parupeneus macronemus</i>           | Seine net  |
| RFSIO | RFSIO001-18 | T0101_001 | BOLD:AAE9260 | 609[0n] | <i>Chaetodon zanzibarensis</i>         | Light trap |
| RFSIO | RFSIO006-18 | T0101_006 | BOLD:AAE4046 | 609[0n] | <i>Acanthurus dussumieri</i>           | Light trap |
| RFSIO | RFSIO014-18 | T0101_014 | BOLD:AAC8636 | 597[3n] | <i>Chaetodon</i>                       | Light trap |
| RFSIO | RFSIO025-18 | T0101_025 | BOLD:ACV6948 | 609[0n] | Apogonidae                             | Light trap |
| RFSIO | RFSIO026-18 | T0102_001 | BOLD:AAE4046 | 609[0n] | <i>Acanthurus dussumieri</i>           | Light trap |
| RFSIO | RFSIO028-18 | T0102_003 | BOLD:AAC2246 | 597[0n] | <i>Ostracion cubicus</i>               | Light trap |
| RFSIO | RFSIO031-18 | T0102_006 | BOLD:ACK8181 | 609[0n] | <i>Pomacanthus<br/>semicirculatus</i>  | Light trap |
| RFSIO | RFSIO036-18 | T0102_011 | BOLD:ABU8857 | 609[0n] | Apogonidae                             | Light trap |
| RFSIO | RFSIO038-18 | T0102_013 | BOLD:AAC2084 | 609[0n] | <i>Ostorhinchus</i>                    | Light trap |
| RFSIO | RFSIO040-18 | T0102_015 | BOLD:AAX0875 | 609[0n] | <i>Hippocampus<br/>camelopardalis</i>  | Light trap |
| RFSIO | RFSIO042-18 | T0102_017 | BOLD:AAB0511 | 609[0n] | <i>Lethrinus</i> BOLDAAB0511           | Light trap |
| RFSIO | RFSIO043-18 | T0102_018 | BOLD:AAE4785 | 597[0n] | <i>Plesiops</i> sp.                    | Light trap |
| RFSIO | RFSIO054-18 | T0102_029 | BOLD:ACY1702 | 603[0n] | Apogonidae                             | Light trap |
| RFSIO | RFSIO056-18 | T0102_031 | BOLD:AAE4046 | 609[0n] | <i>Acanthurus dussumieri</i>           | Light trap |
| RFSIO | RFSIO060-18 | T0103_003 | BOLD:AAB6438 | 609[0n] | <i>Lethrinus mahsena</i>               | Light trap |
| RFSIO | RFSIO062-18 | T0103_005 | BOLD:ACV6948 | 609[0n] | Apogonidae                             | Light trap |
| RFSIO | RFSIO064-18 | T0103_007 | BOLD:ABU8857 | 609[0n] | Apogonidae                             | Light trap |
| RFSIO | RFSIO066-18 | T0103_009 | BOLD:AAE4046 | 609[0n] | <i>Acanthurus dussumieri</i>           | Light trap |
| RFSIO | RFSIO073-18 | T0103_016 | BOLD:ACV6948 | 609[0n] | Apogonidae                             | Light trap |

|       |             |           |              |         |                                   |            |
|-------|-------------|-----------|--------------|---------|-----------------------------------|------------|
| RFSIO | RFSIO074-18 | T0103_017 | BOLD:AAB0511 | 609[0n] | <i>Lethrinus</i> BOLDAAB0511      | Light trap |
| RFSIO | RFSIO075-18 | T0103_018 | BOLD:ACV6948 | 609[0n] | Apogonidae                        | Light trap |
| RFSIO | RFSIO080-18 | T0201_002 | BOLD:AAD8726 | 609[0n] | <i>Fowleria</i>                   | Light trap |
| RFSIO | RFSIO081-18 | T0201_003 | BOLD:AAD0474 | 609[0n] | <i>Balistoides viridescens</i>    | Light trap |
| RFSIO | RFSIO086-18 | T0201_008 | BOLD:AAE1178 | 609[0n] | <i>Chaetodon blackburnii</i>      | Light trap |
| RFSIO | RFSIO093-18 | T0201_015 | BOLD:AAC8278 | 609[0n] | <i>Neoniphon</i>                  | Light trap |
| RFSIO | RFSIO096-18 | T0201_018 | BOLD:ADN1799 | 609[0n] | Actinopterygii                    | Light trap |
| RFSIO | RFSIO109-18 | T0202_004 | BOLD:ACK8109 | 609[0n] | <i>Abudefduf</i>                  | Light trap |
| RFSIO | RFSIO111-18 | T0202_006 | BOLD:AAL9262 | 609[0n] | <i>Nectamia</i>                   | Light trap |
| RFSIO | RFSIO113-18 | T0202_008 | BOLD:AAB6988 | 609[0n] | <i>Plectroglyphidodon</i>         | Light trap |
| RFSIO | RFSIO114-18 | T0202_009 | BOLD:AAE4785 | 609[0n] | <i>Plesiops</i> sp.               | Light trap |
| RFSIO | RFSIO115-18 | T0202_010 | BOLD:AAC8318 | 609[0n] | <i>Neopomacentrus</i>             | Light trap |
| RFSIO | RFSIO116-18 | T0202_011 | BOLD:ACV9716 | 609[0n] | <i>Sphyraena</i> sp.              | Light trap |
| RFSIO | RFSIO117-18 | T0202_012 | BOLD:ADN3788 | 609[1n] | Apogonidae                        | Light trap |
| RFSIO | RFSIO122-18 | T0202_017 | BOLD:AAC8318 | 609[0n] | <i>Neopomacentrus</i>             | Light trap |
| RFSIO | RFSIO125-18 | T0202_020 | BOLD:AAI8860 | 609[0n] | <i>Corythoichthys</i>             | Light trap |
| RFSIO | RFSIO126-18 | T0202_021 | BOLD:AAE4046 | 609[0n] | <i>Acanthurus dussumieri</i>      | Light trap |
| RFSIO | RFSIO130-18 | T0202_025 | BOLD:AAC4647 | 609[0n] | <i>Sargocentron praslin</i>       | Light trap |
| RFSIO | RFSIO138-18 | T0202_033 | BOLD:AAC8318 | 609[0n] | <i>Neopomacentrus</i>             | Light trap |
| RFSIO | RFSIO141-18 | T0202_036 | BOLD:AAJ1254 | 609[0n] | <i>Ostorhinchus flagelliferus</i> | Light trap |
| RFSIO | RFSIO142-18 | T0202_037 | BOLD:AAE4046 | 609[0n] | <i>Acanthurus dussumieri</i>      | Light trap |
| RFSIO | RFSIO144-18 | T0202_039 | BOLD:AAB6438 | 609[0n] | <i>Lethrinus mahsena</i>          | Light trap |
| RFSIO | RFSIO152-18 | T0203_007 | BOLD:AAB5069 | 609[0n] | <i>Synodus</i>                    | Light trap |
| RFSIO | RFSIO177-18 | T0203_032 | BOLD:AAE4046 | 609[0n] | <i>Acanthurus dussumieri</i>      | Light trap |
| RFSIO | RFSIO186-18 | T0301_005 | BOLD:ADO5473 | 522[2n] | Synodontidae                      | Light trap |
| RFSIO | RFSIO192-18 | T0301_011 | BOLD:AAC1521 | 609[0n] | <i>Lethrinus</i>                  | Light trap |
| RFSIO | RFSIO198-18 | T0302_001 | BOLD:AAD0400 | 603[0n] | <i>Sphyraena</i>                  | Light trap |
| RFSIO | RFSIO200-18 | T0302_003 | BOLD:AAB0511 | 597[0n] | <i>Lethrinus</i> BOLDAAB0511      | Light trap |
| RFSIO | RFSIO222-18 | T0303_006 | BOLD:AAL9262 | 609[0n] | <i>Nectamia</i>                   | Light trap |
| RFSIO | RFSIO236-18 | T0501_002 | BOLD:AAC0565 | 609[0n] | <i>Hemiramphus</i>                | Light trap |
| RFSIO | RFSIO237-18 | T0501_003 | BOLD:ACK7521 | 609[0n] | <i>Atherinomorus</i>              | Light trap |
| RFSIO | RFSIO238-18 | T0502_001 | BOLD:ADO4802 | 609[0n] | Apogonidae                        | Light trap |
| RFSIO | RFSIO240-18 | T0503_001 | BOLD:AAC9564 | 606[0n] | <i>Dendrochirus</i> sp.           | Light trap |
| RFSIO | RFSIO242-18 | T0503_003 | BOLD:AAB8146 | 609[0n] | <i>Pterois miles</i>              | Light trap |
| RFSIO | RFSIO243-18 | T0503_004 | BOLD:ACV9601 | 609[0n] | <i>Ostorhinchus</i>               | Light trap |
| RFSIO | RFSIO244-18 | T0503_005 | BOLD:AAC2084 | 609[0n] | <i>Ostorhinchus</i>               | Light trap |
| RFSIO | RFSIO245-18 | T0503_006 | BOLD:AAB4082 | 588[1n] | <i>Pristiapogon</i>               | Light trap |
| RFSIO | RFSIO246-18 | T0503_007 | BOLD:AAB8146 | 609[0n] | <i>Pterois miles</i>              | Light trap |
| RFSIO | RFSIO247-18 | T0503_008 | BOLD:AAC2841 | 609[0n] | <i>Chaetodon kleinii</i>          | Light trap |
| RFSIO | RFSIO249-18 | T0503_010 | BOLD:AAE4046 | 609[0n] | <i>Acanthurus dussumieri</i>      | Light trap |
| RFSIO | RFSIO250-18 | T0503_011 | BOLD:AAE4046 | 609[0n] | <i>Acanthurus dussumieri</i>      | Light trap |
| RFSIO | RFSIO251-18 | T0503_012 | BOLD:AAL9262 | 609[0n] | <i>Nectamia</i>                   | Light trap |
| RFSIO | RFSIO252-18 | T0503_013 | BOLD:AAC4542 | 609[0n] | <i>Sebastapistes</i>              | Light trap |
| RFSIO | RFSIO254-18 | T0503_015 | BOLD:AAC2246 | 600[0n] | <i>Ostracion cubicus</i>          | Light trap |
| RFSIO | RFSIO257-18 | T0503_018 | BOLD:AAB4082 | 585[0n] | <i>Pristiapogon</i>               | Light trap |

|       |             |           |              |         |                                   |            |
|-------|-------------|-----------|--------------|---------|-----------------------------------|------------|
| RFSIO | RFSIO258-18 | T0503_019 | BOLD:AAC4148 | 609[0n] | <i>Tylosurus</i>                  | Light trap |
| RFSIO | RFSIO265-18 | T0602_006 | BOLD:AAC4543 | 609[0n] | <i>Sebastapistes</i>              | Light trap |
| RFSIO | RFSIO266-18 | T0602_007 | BOLD:ADN2100 | 609[0n] | <i>Salarias</i>                   | Light trap |
| RFSIO | RFSIO273-18 | T0603_001 | BOLD:AAE4785 | 606[0n] | <i>Plesiops</i> sp.               | Light trap |
| RFSIO | RFSIO274-18 | T0603_002 | BOLD:AAJ1709 | 609[0n] | <i>Ariosoma scheelei</i>          | Light trap |
| RFSIO | RFSIO275-18 | T0603_003 | BOLD:ACV6948 | 609[0n] | Apogonidae                        | Light trap |
| RFSIO | RFSIO276-18 | T0603_004 | BOLD:AAC2084 | 609[0n] | <i>Ostorhinchus</i>               | Light trap |
| RFSIO | RFSIO277-18 | T0603_005 | BOLD:AAJ1260 | 609[0n] | <i>Ostorhinchus</i>               | Light trap |
| RFSIO | RFSIO279-18 | T0603_007 | BOLD:AAC4543 | 609[0n] | <i>Sebastapistes</i>              | Light trap |
| RFSIO | RFSIO280-18 | T0603_008 | BOLD:AAB0511 | 597[0n] | <i>Lethrinus</i> BOLDAAB0511      | Light trap |
| RFSIO | RFSIO283-18 | T0603_011 | BOLD:AAC9564 | 597[0n] | <i>Dendrochirus</i> sp.           | Light trap |
| RFSIO | RFSIO287-18 | T0701_001 | BOLD:ACE9301 | 609[0n] | <i>Ostorhinchus</i>               | Light trap |
| RFSIO | RFSIO288-18 | T0701_002 | BOLD:AAB9539 | 609[1n] | <i>Pomacentrus</i>                | Light trap |
| RFSIO | RFSIO291-18 | T0701_005 | BOLD:ACC5690 | 609[0n] | Apogonidae                        | Light trap |
| RFSIO | RFSIO294-18 | T0701_008 | BOLD:AAE4046 | 609[0n] | <i>Acanthurus dussumieri</i>      | Light trap |
| RFSIO | RFSIO297-18 | T0701_011 | BOLD:ACV6948 | 609[0n] | Apogonidae                        | Light trap |
| RFSIO | RFSIO298-18 | T0701_012 | BOLD:AAC2084 | 609[1n] | <i>Ostorhinchus</i>               | Light trap |
| RFSIO | RFSIO300-18 | T0701_014 | BOLD:AAL9262 | 609[0n] | <i>Nectamia</i>                   | Light trap |
| RFSIO | RFSIO301-18 | T0701_015 | BOLD:AAN4283 | 609[0n] | <i>Plectropomus punctatus</i>     | Light trap |
| RFSIO | RFSIO303-18 | T0701_017 | BOLD:ACW9154 | 609[0n] | <i>Apogon</i>                     | Light trap |
| RFSIO | RFSIO304-18 | T0701_018 | BOLD:ACW9154 | 609[0n] | <i>Apogon</i>                     | Light trap |
| RFSIO | RFSIO305-18 | T0701_019 | BOLD:ACC5690 | 609[0n] | Apogonidae                        | Light trap |
| RFSIO | RFSIO308-18 | T0701_022 | BOLD:AAC4543 | 609[0n] | <i>Sebastapistes</i>              | Light trap |
| RFSIO | RFSIO312-18 | T0702_001 | BOLD:ACC5690 | 609[0n] | Apogonidae                        | Light trap |
| RFSIO | RFSIO315-18 | T0702_004 | BOLD:AAE5342 | 609[0n] | <i>Hippichthys</i>                | Light trap |
| RFSIO | RFSIO317-18 | T0702_006 | BOLD:ACV6948 | 609[0n] | Apogonidae                        | Light trap |
| RFSIO | RFSIO318-18 | T0702_007 | BOLD:AAN4283 | 609[0n] | <i>Plectropomus punctatus</i>     | Light trap |
| RFSIO | RFSIO319-18 | T0702_008 | BOLD:AAJ1709 | 609[0n] | <i>Ariosoma scheelei</i>          | Light trap |
| RFSIO | RFSIO320-18 | T0702_009 | BOLD:AAC0108 | 609[0n] | <i>Asterropteryx</i>              | Light trap |
| RFSIO | RFSIO323-18 | T0702_012 | BOLD:ACV7965 | 591[0n] | <i>Salarias</i>                   | Light trap |
| RFSIO | RFSIO327-18 | T0702_016 | BOLD:ACW8182 | 609[0n] | Apogonidae                        | Light trap |
| RFSIO | RFSIO330-18 | T0702_019 | BOLD:AAD8454 | 609[0n] | <i>Ostorhinchus</i>               | Light trap |
| RFSIO | RFSIO332-18 | T0702_021 | BOLD:AAJ1709 | 609[0n] | <i>Ariosoma scheelei</i>          | Light trap |
| RFSIO | RFSIO334-18 | T0703_002 | BOLD:ACV6948 | 609[0n] | Apogonidae                        | Light trap |
| RFSIO | RFSIO335-18 | T0703_003 | BOLD:ACV7965 | 591[0n] | <i>Salarias</i>                   | Light trap |
| RFSIO | RFSIO337-18 | T0703_005 | BOLD:AAJ8751 | 609[0n] | <i>Apogon</i>                     | Light trap |
| RFSIO | RFSIO343-18 | T0703_011 | BOLD:AAB0587 | 609[0n] | <i>Caranx ignobilis</i>           | Light trap |
| RFSIO | RFSIO346-18 | T0703_014 | BOLD:AAB6438 | 609[0n] | <i>Lethrinus mahsena</i>          | Light trap |
| RFSIO | RFSIO348-18 | T0703_016 | BOLD:AAB5978 | 609[0n] | <i>Parupeneus</i>                 | Light trap |
| RFSIO | RFSIO349-18 | T0703_017 | BOLD:AAG3690 | 609[0n] | <i>Torquigener flavimaculosus</i> | Light trap |
| RFSIO | RFSIO351-18 | T0703_019 | BOLD:AAU1214 | 609[0n] | Scorpaenidae                      | Light trap |
| RFSIO | RFSIO352-18 | T0703_020 | BOLD:AAD9453 | 609[0n] | <i>Nectamia</i>                   | Light trap |
| RFSIO | RFSIO353-18 | T0703_021 | BOLD:AAL9262 | 609[0n] | <i>Nectamia</i>                   | Light trap |
| RFSIO | RFSIO354-18 | T0703_022 | BOLD:AAL9262 | 609[0n] | <i>Nectamia</i>                   | Light trap |
| RFSIO | RFSIO356-18 | T0801_001 | BOLD:AAD5600 | 609[0n] | <i>Ostorhinchus</i>               | Light trap |

|       |             |           |              |         |                                            |            |
|-------|-------------|-----------|--------------|---------|--------------------------------------------|------------|
| RFSIO | RFSIO357-18 | T0801_002 | BOLD:AAB2440 | 609[0n] | <i>Lutjanus argentimaculatus</i>           | Light trap |
| RFSIO | RFSIO362-18 | T0801_007 | BOLD:ACW8182 | 609[0n] | Apogonidae                                 | Light trap |
| RFSIO | RFSIO364-18 | T0801_009 | BOLD:ABZ0131 | 609[0n] | <i>Lethrinus</i>                           | Light trap |
| RFSIO | RFSIO367-18 | T0801_012 | BOLD:AAJ8751 | 609[0n] | <i>Apogon</i>                              | Light trap |
| RFSIO | RFSIO369-18 | T0801_014 | BOLD:ACC1190 | 540[0n] | <i>Canthigaster</i>                        | Light trap |
| RFSIO | RFSIO374-18 | T0801_019 | BOLD:AAD9453 | 609[0n] | <i>Nectamia</i>                            | Light trap |
| RFSIO | RFSIO376-18 | T0801_022 | BOLD:ACV7965 | 591[0n] | <i>Salarias</i>                            | Light trap |
| RFSIO | RFSIO379-18 | T0801_025 | BOLD:ACV6948 | 609[0n] | Apogonidae                                 | Light trap |
| RFSIO | RFSIO382-18 | T0801_028 | BOLD:AAE4046 | 609[0n] | <i>Acanthurus dussumieri</i>               | Light trap |
| RFSIO | RFSIO383-18 | T0801_029 | BOLD:ABU8857 | 609[0n] | Apogonidae                                 | Light trap |
| RFSIO | RFSIO388-18 | T0802_001 | BOLD:AAL7906 | 609[0n] | Gobiidae                                   | Light trap |
| RFSIO | RFSIO389-18 | T0802_002 | BOLD:ACV6948 | 609[0n] | Apogonidae                                 | Light trap |
| RFSIO | RFSIO393-18 | T0802_006 | BOLD:AAE2821 | 609[0n] | <i>Synanceia</i>                           | Light trap |
| RFSIO | RFSIO397-18 | T0802_010 | BOLD:AAD3666 | 600[0n] | <i>Dipterygonotus balteatus</i>            | Light trap |
| RFSIO | RFSIO398-18 | T0802_011 | BOLD:AAC4543 | 603[0n] | <i>Sebastapistes</i>                       | Light trap |
| RFSIO | RFSIO399-18 | T0802_012 | BOLD:AAB9539 | 609[0n] | <i>Pomacentrus</i> sp.                     | Light trap |
| RFSIO | RFSIO401-18 | T0803_002 | BOLD:AAD9105 | 609[0n] | <i>Ptereleotris evides</i>                 | Light trap |
| RFSIO | RFSIO403-18 | T0803_004 | BOLD:AAA9764 | 609[0n] | <i>Myripristis</i> sp.                     | Light trap |
| RFSIO | RFSIO404-18 | T0803_005 | BOLD:AAB0871 | 609[0n] | <i>Selar</i>                               | Light trap |
| RFSIO | RFSIO406-18 | T0803_007 | BOLD:AAB0587 | 609[0n] | <i>Caranx ignobilis</i>                    | Light trap |
| RFSIO | RFSIO408-18 | T0803_009 | BOLD:AAB3424 | 609[0n] | <i>Sargocentron</i>                        | Light trap |
| RFSIO | RFSIO412-18 | T0901_004 | BOLD:AAU1500 | 609[0n] | <i>Halidesmus</i> sp.<br><i>Madagascar</i> | Light trap |
| RFSIO | RFSIO416-18 | T0902_004 | BOLD:AAD8454 | 609[0n] | <i>Ostorhinchus</i>                        | Light trap |
| RFSIO | RFSIO417-18 | T0902_005 | BOLD:AAE0701 | 609[0n] | <i>Psenes cyanophrys</i>                   | Light trap |
| RFSIO | RFSIO419-18 | T0903_002 | BOLD:AAF8797 | 609[0n] | <i>Plectorhinchus</i>                      | Light trap |
| RFSIO | RFSIO425-18 | T0903_008 | BOLD:AAB2907 | 609[0n] | <i>Lutjanus monostigma</i>                 | Light trap |
| RFSIO | RFSIO426-18 | T0903_009 | BOLD:AAC4542 | 609[0n] | <i>Sebastapistes</i>                       | Light trap |
| RFSIO | RFSIO428-18 | T0903_011 | BOLD:ACV9758 | 609[0n] | <i>Hypoatherina</i> sp.                    | Light trap |
| RFSIO | RFSIO434-18 | T1001_005 | BOLD:ACE6993 | 585[3n] | <i>Hippocampus</i>                         | Light trap |
| RFSIO | RFSIO437-18 | T1001_008 | BOLD:AAB0511 | 609[0n] | <i>Lethrinus</i> BOLDAAB0511               | Light trap |
| RFSIO | RFSIO442-18 | T1002_001 | BOLD:AAB8394 | 609[0n] | <i>Zoramia</i>                             | Light trap |
| RFSIO | RFSIO443-18 | T1002_002 | BOLD:AAB8394 | 609[0n] | <i>Zoramia</i>                             | Light trap |
| RFSIO | RFSIO446-18 | T1002_005 | BOLD:AAC4124 | 609[0n] | <i>Valenciennea</i>                        | Light trap |
| RFSIO | RFSIO447-18 | T1002_006 | BOLD:AAB0511 | 606[2n] | <i>Lethrinus</i> BOLDAAB0511               | Light trap |
| RFSIO | RFSIO449-18 | T1002_008 | BOLD:AAL7563 | 609[0n] | <i>Hypoatherina</i> sp.                    | Light trap |
| RFSIO | RFSIO450-18 | T1003_001 | BOLD:ABU8857 | 609[0n] | Apogonidae                                 | Light trap |
| RFSIO | RFSIO470-18 | T1101_019 | BOLD:AAC0108 | 609[0n] | <i>Asterropteryx</i>                       | Light trap |
| RFSIO | RFSIO471-18 | T1101_020 | BOLD:AAC1522 | 597[0n] | <i>Lethrinus obsoletus</i>                 | Light trap |
| RFSIO | RFSIO473-18 | T1102_001 | BOLD:AAC1521 | 609[2n] | <i>Lethrinus</i>                           | Light trap |
| RFSIO | RFSIO475-18 | T1102_003 | BOLD:AAC0108 | 609[0n] | <i>Asterropteryx</i>                       | Light trap |
| RFSIO | RFSIO479-18 | T1102_007 | BOLD:AAC2084 | 609[0n] | <i>Ostorhinchus</i>                        | Light trap |
| RFSIO | RFSIO483-18 | T1103_004 | BOLD:AAE6131 | 609[0n] | <i>Petroscirtes</i>                        | Light trap |
| RFSIO | RFSIO487-18 | T1201_004 | BOLD:AAD2206 | 609[0n] | <i>Apogon</i>                              | Light trap |
| RFSIO | RFSIO490-18 | T1201_007 | BOLD:ACY1702 | 606[0n] | Apogonidae                                 | Light trap |



|       |             |           |              |         |                                   |            |
|-------|-------------|-----------|--------------|---------|-----------------------------------|------------|
| RFSIO | RFSIO493-18 | T1201_010 | BOLD:AAJ1260 | 609[0n] | <i>Ostorhinchus</i>               | Light trap |
| RFSIO | RFSIO498-18 | T1201_015 | BOLD:AAC6461 | 609[0n] | <i>Siganus argenteus</i>          | Light trap |
| RFSIO | RFSIO499-18 | T1202_001 | BOLD:AAC4543 | 609[0n] | <i>Sebastapistes</i>              | Light trap |
| RFSIO | RFSIO500-18 | T1202_002 | BOLD:AAD8726 | 609[0n] | <i>Fowleria</i>                   | Light trap |
| RFSIO | RFSIO508-18 | T1202_010 | BOLD:AAC4543 | 609[1n] | <i>Sebastapistes</i>              | Light trap |
| RFSIO | RFSIO509-18 | T1202_011 | BOLD:ACS5956 | 609[0n] | <i>Ostorhinchus gularis</i>       | Light trap |
| RFSIO | RFSIO514-18 | T1202_016 | BOLD:ACV6948 | 609[0n] | Apogonidae                        | Light trap |
| RFSIO | RFSIO515-18 | T1202_017 | BOLD:AAJ1260 | 609[0n] | <i>Ostorhinchus</i>               | Light trap |
| RFSIO | RFSIO516-18 | T1202_018 | BOLD:AAD0400 | 609[0n] | <i>Sphyaena</i>                   | Light trap |
| RFSIO | RFSIO524-18 | T1202_026 | BOLD:AAJ1264 | 606[1n] | <i>Pristiapogon</i>               | Light trap |
| RFSIO | RFSIO532-18 | T1203_006 | BOLD:AAD8726 | 609[0n] | <i>Fowleria</i>                   | Light trap |
| RFSIO | RFSIO535-18 | T1203_009 | BOLD:ADN1799 | 609[0n] | Actinopterygii                    | Light trap |
| RFSIO | RFSIO538-18 | T1203_012 | BOLD:ACY1702 | 603[0n] | Apogonidae                        | Light trap |
| RFSIO | RFSIO542-18 | T1203_016 | BOLD:AAC8318 | 609[0n] | <i>Neopomacentrus</i>             | Light trap |
| RFSIO | RFSIO544-18 | T1203_018 | BOLD:AAX0875 | 609[0n] | <i>Hippocampus camelopardalis</i> | Light trap |
| RFSIO | RFSIO545-18 | T1203_019 | BOLD:AAD1433 | 609[0n] | <i>Parupeneus cyclostomus</i>     | Light trap |
| RFSIO | RFSIO546-18 | T1203_020 | BOLD:ACS5956 | 609[0n] | <i>Ostorhinchus gularis</i>       | Light trap |
