# Supplementary material
Source: MDPI journal article supplement (https://www.mdpi.com/1424-2818/14/5/377)
Supplement: s1 [file s1]

**Table S3.** List of barcoded fish species from Madagascar in BOLD in May 04, 2022

| Order             | Family          | Genus species                       | BINs         |
|-------------------|-----------------|-------------------------------------|--------------|
| Perciformes       | Coryphaenidae   | <i>Coryphaena hippurus</i>          | BOLD:AAA5277 |
| Perciformes       | Sphyraenidae    | <i>Sphyraena barracuda</i>          | BOLD:AAA6100 |
| Perciformes       | Cichlidae       | <i>Oreochromis niloticus</i>        | BOLD:AAA6537 |
| Perciformes       | Sillaginidae    | <i>Sillago caudicula</i>            | BOLD:AAA7603 |
| Perciformes       | Lutjanidae      | <i>Lutjanus lutjanus</i>            | BOLD:AAA8168 |
| Perciformes       | Cichlidae       | <i>Oreochromis mossambicus</i>      | BOLD:AAA8511 |
| Perciformes       | Cichlidae       | <i>Oreochromis macrochir</i>        | BOLD:AAA8513 |
| Perciformes       | Carangidae      | <i>Trachurus trachurus</i>          | BOLD:AAA8614 |
| Perciformes       | Pomatomidae     | <i>Pomatomus saltatrix</i>          | BOLD:AAA9142 |
| Perciformes       | Teraponidae     | <i>Terapon jarbua</i>               | BOLD:AAA9351 |
| Perciformes       | Teraponidae     | <i>Terapon theraps</i>              | BOLD:AAA9352 |
| Aulopiformes      | Synodontidae    | <i>Trachinocephalus myops</i>       | BOLD:AAA9578 |
| Perciformes       | Scombridae      | <i>Rastrelliger kanagurta</i>       | BOLD:AAA9666 |
| Perciformes       | Teraponidae     | <i>Pelates quadrilineatus</i>       | BOLD:AAA9700 |
| Beryciformes      | Holocentridae   | <i>Myripristis murdjan</i>          | BOLD:AAA9764 |
| Perciformes       | Serranidae      | <i>Epinephelus areolatus</i>        | BOLD:AAA9822 |
| Perciformes       | Labridae        | <i>Labroides dimidiatus</i>         | BOLD:AAB0002 |
| Perciformes       | Labridae        | <i>Labroides bicolor</i>            | BOLD:AAB0004 |
| Perciformes       | Labridae        | <i>Thalassoma hardwicke</i>         | BOLD:AAB0061 |
| Perciformes       | Trichiuridae    | <i>Trichiurus lepturus</i>          | BOLD:AAB0165 |
| Perciformes       | Acanthuridae    | <i>Acanthurus nigrofusus</i>        | BOLD:AAB0201 |
| Perciformes       | Mullidae        | <i>Parupeneus indicus</i>           | BOLD:AAB0334 |
| Perciformes       | Carangidae      | <i>Caranx melampygus</i>            | BOLD:AAB0585 |
| Perciformes       | Carangidae      | <i>Caranx ignobilis</i>             | BOLD:AAB0587 |
| Perciformes       | Scombridae      | <i>Auxis thazard</i>                | BOLD:AAB0928 |
| Perciformes       | Serranidae      | <i>Epinephelus fasciatus</i>        | BOLD:AAB1334 |
| Perciformes       | Chaetodontidae  | <i>Chaetodon auriga</i>             | BOLD:AAB1540 |
| Perciformes       | Priacanthidae   | <i>Priacanthus arenatus</i>         | BOLD:AAB1642 |
| Aulopiformes      | Synodontidae    | <i>Saurida gracilis</i>             | BOLD:AAB1854 |
| Aulopiformes      | Synodontidae    | <i>Saurida micropectoralis</i>      | BOLD:AAB1858 |
| Perciformes       | Priacanthidae   | <i>Heteropriacanthus cruentatus</i> | BOLD:AAB1874 |
| Scorpaeniformes   | Platycephalidae | <i>Platycephalus indicus</i>        | BOLD:AAB2371 |
| Perciformes       | Lutjanidae      | <i>Lutjanus argentimaculatus</i>    | BOLD:AAB2440 |
| Perciformes       | Leiognathidae   | <i>Leiognathus equulus</i>          | BOLD:AAB2487 |
| Perciformes       | Leiognathidae   | <i>Aurigequula fasciata</i>         | BOLD:AAB2489 |
| Perciformes       | Mullidae        | <i>Mulloidichthys flavolineatus</i> | BOLD:AAB2592 |
| Perciformes       | Lutjanidae      | <i>Lutjanus monostigma</i>          | BOLD:AAB2907 |
| Perciformes       | Rachycentridae  | <i>Rachycentron canadum</i>         | BOLD:AAB2939 |
| Perciformes       | Carangidae      | <i>Platycaranx chrysophrys</i>      | BOLD:AAB2977 |
| Tetraodontiformes | Ostraciidae     | <i>Lactoria cornuta</i>             | BOLD:AAB2988 |
| Perciformes       | Labridae        | <i>Halichoeres hortulanus</i>       | BOLD:AAB3085 |

|                   |                 |                                      |              |
|-------------------|-----------------|--------------------------------------|--------------|
| Perciformes       | Labridae        | <i>Halichoeres hortulanus</i>        | BOLD:AAB3086 |
| Perciformes       | Labridae        | <i>Halichoeres hortulanus</i>        | BOLD:AAB3087 |
| Perciformes       | Acanthuridae    | <i>Acanthurus lineatus</i>           | BOLD:AAB3207 |
| Beryciformes      | Holocentridae   | <i>Sargocentron diadema</i>          | BOLD:AAB3424 |
| Perciformes       | Carangidae      | <i>Carangoides coeruleopinnatus</i>  | BOLD:AAB3475 |
| Perciformes       | Serranidae      | <i>Cephalopholis boenak</i>          | BOLD:AAB3684 |
| Perciformes       | Sparidae        | <i>Argyrops spinifer</i>             | BOLD:AAB3720 |
| Perciformes       | Carangidae      | <i>Parastromateus niger</i>          | BOLD:AAB3884 |
| Perciformes       | Gobiidae        | <i>Priolepis cincta</i>              | BOLD:AAB3906 |
| Perciformes       | Serranidae      | <i>Pseudanthias squamipinnis</i>     | BOLD:AAB3926 |
| Perciformes       | Apogonidae      | <i>Apogonichthyoides nigripinnis</i> | BOLD:AAB4081 |
| Perciformes       | Sparidae        | <i>Diplodus sargus</i>               | BOLD:AAB4180 |
| Perciformes       | Labridae        | <i>Cheilinus chlorourus</i>          | BOLD:AAB4186 |
| Perciformes       | Labridae        | <i>Cheilinus oxycephalus</i>         | BOLD:AAB4187 |
| Perciformes       | Labridae        | <i>Cheilinus trilobatus</i>          | BOLD:AAB4188 |
| Perciformes       | Carangidae      | <i>Carangoides chrysophrys</i>       | BOLD:AAB4362 |
| Perciformes       | Sparidae        | <i>Rhabdosargus sarba</i>            | BOLD:AAB4844 |
| Perciformes       | Menidae         | <i>Mene maculata</i>                 | BOLD:AAB4862 |
| Perciformes       | Labridae        | <i>Hemigymnus melapterus</i>         | BOLD:AAB5264 |
| Perciformes       | Carangidae      | <i>Megalaspis cordyla</i>            | BOLD:AAB5271 |
| Clupeiformes      | Clupeidae       | <i>Heniochus diphreutes</i>          | BOLD:AAB5717 |
| Perciformes       | Carangidae      | <i>Alepes djedaba</i>                | BOLD:AAB5772 |
| Blenniiformes     | Blenniidae      | <i>Istiblennius edentulus</i>        | BOLD:AAB5865 |
| Tetraodontiformes | Tetraodontidae  | <i>Arothron nigropunctatus</i>       | BOLD:AAB5886 |
| Scorpaeniformes   | Scorpaenidae    | <i>Pterois mombasae</i>              | BOLD:AAB5916 |
| Perciformes       | Ariommatidae    | <i>Ariomma indicum</i>               | BOLD:AAB5940 |
| Scorpaeniformes   | Dactylopteridae | <i>Dactyloptena orientalis</i>       | BOLD:AAB5966 |
| Perciformes       | Mullidae        | <i>Parupeneus barberinus</i>         | BOLD:AAB5978 |
| Syngnathiformes   | Fistulariidae   | <i>Fistularia commersonii</i>        | BOLD:AAB5992 |
| Perciformes       | Echeneidae      | <i>Echeneis naucrates</i>            | BOLD:AAB6121 |
| Perciformes       | Pomacentridae   | <i>Abudefduf sordidus</i>            | BOLD:AAB6123 |
| Perciformes       | Pomacentridae   | <i>Abudefduf septemfasciatus</i>     | BOLD:AAB6124 |
| Perciformes       | Chaetodontidae  | <i>Chaetodon lunula</i>              | BOLD:AAB6339 |
| Perciformes       | Mullidae        | <i>Upeneus sulphureus</i>            | BOLD:AAB6467 |
| Perciformes       | Mullidae        | <i>Upeneus moluccensis</i>           | BOLD:AAB6469 |
| Perciformes       | Sciaenidae      | <i>Otolithes ruber</i>               | BOLD:AAB6481 |
| Perciformes       | Scaridae        | <i>Chlorurus sordidus</i>            | BOLD:AAB6670 |
| Perciformes       | Lutjanidae      | <i>Lutjanus fulvus</i>               | BOLD:AAB7015 |
| Clupeiformes      | Clupeidae       | <i>Sardinella gibbosa</i>            | BOLD:AAB7263 |
| Perciformes       | Carangidae      | <i>Gnathanodon speciosus</i>         | BOLD:AAB7462 |
| Perciformes       | Labridae        | <i>Pseudocheilinus hexataenia</i>    | BOLD:AAB7572 |
| Perciformes       | Lutjanidae      | <i>Lutjanus rivulatus</i>            | BOLD:AAB7684 |
| Perciformes       | Labridae        | <i>Cheilinus fasciatus</i>           | BOLD:AAB7821 |
| Perciformes       | Carangidae      | <i>Alectis ciliaris</i>              | BOLD:AAB7827 |
| Perciformes       | Labridae        | <i>Coris gaimard</i>                 | BOLD:AAB8241 |

|                   |                |                                        |              |
|-------------------|----------------|----------------------------------------|--------------|
| Perciformes       | Serranidae     | <i>Epinephelus merra</i>               | BOLD:AAB8387 |
| Perciformes       | Serranidae     | <i>Epinephelus malabaricus</i>         | BOLD:AAB8389 |
| Perciformes       | Serranidae     | <i>Epinephelus coioides</i>            | BOLD:AAB8391 |
| Perciformes       | Carangidae     | <i>Seriolina nigrofasciata</i>         | BOLD:AAB8503 |
| Perciformes       | Gobiidae       | <i>Amblygobius phalaena</i>            | BOLD:AAB8727 |
| Perciformes       | Acanthuridae   | <i>Acanthurus nigricauda</i>           | BOLD:AAB8729 |
| Perciformes       | Scaridae       | <i>Scarus psittacus</i>                | BOLD:AAB8901 |
| Perciformes       | Acanthuridae   | <i>Ctenochaetus binotatus</i>          | BOLD:AAB9166 |
| Perciformes       | Cirrhitidae    | <i>Cirrhitichthys oxycephalus</i>      | BOLD:AAB9318 |
| Perciformes       | Microdesmidae  | <i>Nemateleotris magnifica</i>         | BOLD:AAB9338 |
| Perciformes       | Labridae       | <i>Thalassoma lutescens</i>            | BOLD:AAB9438 |
| Perciformes       | Mullidae       | <i>Upeneus margarethae</i>             | BOLD:AAB9714 |
| Beryciformes      | Holocentridae  | <i>Myripristis pralinia</i>            | BOLD:AAB9836 |
| Perciformes       | Labridae       | <i>Anampses meleagrides</i>            | BOLD:AAB9954 |
| Perciformes       | Labridae       | <i>Anampses caeruleopunctatus</i>      | BOLD:AAB9969 |
| Perciformes       | Gobiidae       | <i>Asterropteryx semipunctata</i>      | BOLD:AAC0108 |
| Anguilliformes    | Muraenidae     | <i>Gymnothorax chilospilus</i>         | BOLD:AAC0199 |
| Perciformes       | Serranidae     | <i>Cephalopholis miniata</i>           | BOLD:AAC0216 |
| Perciformes       | Leiognathidae  | <i>Equulites klunzingeri</i>           | BOLD:AAC0238 |
| Perciformes       | Labridae       | <i>Oxycheilinus digramma</i>           | BOLD:AAC0639 |
| Perciformes       | Labridae       | <i>Halichoeres cosmetus</i>            | BOLD:AAC1194 |
| Perciformes       | Labridae       | <i>Halichoeres lamarii</i>             | BOLD:AAC1195 |
| Perciformes       | Mullidae       | <i>Upeneus pori</i>                    | BOLD:AAC1406 |
| Perciformes       | Lethrinidae    | <i>Lethrinus xanthochilus</i>          | BOLD:AAC1546 |
| Perciformes       | Acanthuridae   | <i>Naso brevirostris</i>               | BOLD:AAC1635 |
| Perciformes       | Lobotidae      | <i>Lobotes surinamensis</i>            | BOLD:AAC1878 |
| Perciformes       | Labridae       | <i>Bodianus axillaris</i>              | BOLD:AAC2066 |
| Perciformes       | Caesionidae    | <i>Pterocaesio marri</i>               | BOLD:AAC2204 |
| Clupeiformes      | Chirocentridae | <i>Chirocentrus dorab</i>              | BOLD:AAC2273 |
| Perciformes       | Sphyraenidae   | <i>Sphyraena acutipinnis</i>           | BOLD:AAC2431 |
| Perciformes       | Pomacentridae  | <i>Pomacentrus pavo</i>                | BOLD:AAC2601 |
| Perciformes       | Chaetodontidae | <i>Chaetodon xanthurus</i>             | BOLD:AAC2634 |
| Perciformes       | Carangidae     | <i>Turram fulvoguttatum</i>            | BOLD:AAC2745 |
| Tetraodontiformes | Balistidae     | <i>Balistapus undulatus</i>            | BOLD:AAC2755 |
| Perciformes       | Labridae       | <i>Thalassoma trilobatum</i>           | BOLD:AAC2785 |
| Perciformes       | Labridae       | <i>Thalassoma hebraicum</i>            | BOLD:AAC2788 |
| Perciformes       | Sciaenidae     | <i>Argyrosomus japonicus</i>           | BOLD:AAC2818 |
| Perciformes       | Gobiidae       | <i>Valenciennesa strigata</i>          | BOLD:AAC2877 |
| Perciformes       | Chaetodontidae | <i>Herklotsichthys quadrimaculatus</i> | BOLD:AAC2887 |
| Perciformes       | Pomacanthidae  | <i>Pygoplites diacanthus</i>           | BOLD:AAC3194 |
| Perciformes       | Labridae       | <i>Oxycheilinus bimaculatus</i>        | BOLD:AAC3195 |
| Perciformes       | Acanthuridae   | <i>Paracanthurus hepatus</i>           | BOLD:AAC3227 |
| Perciformes       | Nemipteridae   | <i>Scolopsis vosmeri</i>               | BOLD:AAC3574 |
| Perciformes       | Pomacentridae  | <i>Chromis weberi</i>                  | BOLD:AAC3642 |
| Perciformes       | Gobiidae       | <i>Valenciennesa puellaris</i>         | BOLD:AAC4124 |

|                   |                |                                      |              |
|-------------------|----------------|--------------------------------------|--------------|
| Mugiliformes      | Mugilidae      | <i>Moolgarda cunnesius</i>           | BOLD:AAC4146 |
| Beloniformes      | Belonidae      | <i>Tylosurus crocodilus</i>          | BOLD:AAC4148 |
| Perciformes       | Serranidae     | <i>Cephalopholis argus</i>           | BOLD:AAC4474 |
| Elopiformes       | Megalopidae    | <i>Megalops cyprinoides</i>          | BOLD:AAC4501 |
| Scorpaeniformes   | Scorpaenidae   | <i>Sebastapistes strongia</i>        | BOLD:AAC4542 |
| Perciformes       | Labridae       | <i>Coris aygula</i>                  | BOLD:AAC4751 |
| Perciformes       | Pomacentridae  | <i>Amphiprion allardi</i>            | BOLD:AAC4980 |
| Perciformes       | Serranidae     | <i>Pseudogramma polyacantha</i>      | BOLD:AAC5137 |
| Perciformes       | Pomacentridae  | <i>Neoglyphidodon melas</i>          | BOLD:AAC5328 |
| Anguilliformes    | Muraenidae     | <i>Gymnothorax undulatus</i>         | BOLD:AAC5500 |
| Tetraodontiformes | Tetraodontidae | <i>Lagocephalus sceleratus</i>       | BOLD:AAC5565 |
| Perciformes       | Gobiidae       | <i>Valenciennesia sexguttata</i>     | BOLD:AAC5611 |
| Perciformes       | Kuhliidae      | <i>Kuhlia mugil</i>                  | BOLD:AAC5673 |
| Perciformes       | Ephippidae     | <i>Platax teira</i>                  | BOLD:AAC5812 |
| Perciformes       | Cirrhitidae    | <i>Paracirrhites forsteri</i>        | BOLD:AAC5873 |
| Perciformes       | Cirrhitidae    | <i>Paracirrhites arcatus</i>         | BOLD:AAC6007 |
| Perciformes       | Pempheridae    | <i>Pempheris connelli</i>            | BOLD:AAC6084 |
| Perciformes       | Gobiidae       | <i>Glossogobius giuris</i>           | BOLD:AAC6086 |
| Perciformes       | Pomacanthidae  | <i>Pomacanthus imperator</i>         | BOLD:AAC6186 |
| Perciformes       | Serranidae     | <i>Nemanthias carberryi</i>          | BOLD:AAC6424 |
| Perciformes       | Pomacentridae  | <i>Plectroglyphidodon leucozonus</i> | BOLD:AAC6436 |
| Perciformes       | Siganidae      | <i>Siganus argenteus</i>             | BOLD:AAC6461 |
| Perciformes       | Ephippidae     | <i>Platax orbicularis</i>            | BOLD:AAC6496 |
| Perciformes       | Pomacentridae  | <i>Chromis ternatensis</i>           | BOLD:AAC6972 |
| Perciformes       | Pomacentridae  | <i>Chromis ternatensis</i>           | BOLD:AAC6973 |
| Perciformes       | Pomacentridae  | <i>Pomacentrus trilineatus</i>       | BOLD:AAC7089 |
| Perciformes       | Pempheridae    | <i>Parapriacanthus ransonneti</i>    | BOLD:AAC7599 |
| Perciformes       | Labridae       | <i>Bodianus bilunulatus</i>          | BOLD:AAC7634 |
| Perciformes       | Labridae       | <i>Bodianus diana</i>                | BOLD:AAC7642 |
| Perciformes       | Serranidae     | <i>Grammistes sexlineatus</i>        | BOLD:AAC7810 |
| Perciformes       | Labridae       | <i>Halichoeres zulu</i>              | BOLD:AAC7895 |
| Perciformes       | Labridae       | <i>Halichoeres nebulosus</i>         | BOLD:AAC7896 |
| Perciformes       | Acanthuridae   | <i>Naso unicornis</i>                | BOLD:AAC8042 |
| Perciformes       | Lethrinidae    | <i>Lethrinus miniatus</i>            | BOLD:AAC8078 |
| Perciformes       | Gobiidae       | <i>Istigobius decoratus</i>          | BOLD:AAC8178 |
| Perciformes       | Lethrinidae    | <i>Lethrinus crocineus</i>           | BOLD:AAC8224 |
| Perciformes       | Holocentridae  | <i>Neoniphon sammara</i>             | BOLD:AAC8278 |
| Anguilliformes    | Muraenidae     | <i>Gymnothorax buroensis</i>         | BOLD:AAC8356 |
| Perciformes       | Pomacentridae  | <i>Stegastes nigricans</i>           | BOLD:AAC8562 |
| Perciformes       | Chaetodontidae | <i>Chaetodon meyeri</i>              | BOLD:AAC8622 |
| Perciformes       | Chaetodontidae | <i>Chaetodon ulietensis</i>          | BOLD:AAC8636 |
| Perciformes       | Acanthuridae   | <i>Ctenochaetus strigosus</i>        | BOLD:AAC9069 |
| Scorpaeniformes   | Scorpaenidae   | <i>Dendrochirus brachypterus</i>     | BOLD:AAC9564 |
| Perciformes       | Serranidae     | <i>Epinephelus marginatus</i>        | BOLD:AAC9620 |
| Perciformes       | Pomacentridae  | <i>Pomacentrus baenschi</i>          | BOLD:AAC9672 |

|                   |                 |                                    |              |
|-------------------|-----------------|------------------------------------|--------------|
| Tetraodontiformes | Tetraodontidae  | <i>Canthigaster valentini</i>      | BOLD:AAC9721 |
| Perciformes       | Cichlidae       | <i>Oreochromis niloticus</i>       | BOLD:AAC9904 |
| Tetraodontiformes | Monacanthidae   | <i>Aluterus scriptus</i>           | BOLD:AAD0081 |
| Perciformes       | Sphyraenidae    | <i>Sphyraena chrysotaenia</i>      | BOLD:AAD0400 |
| Tetraodontiformes | Balistidae      | <i>Balistoides viridescens</i>     | BOLD:AAD0474 |
| Blenniiformes     | Hemiramphidae   | <i>Hyporhamphus affinis</i>        | BOLD:AAD0579 |
| Perciformes       | Scaridae        | <i>Scarus niger</i>                | BOLD:AAD0815 |
| Blenniiformes     | Blenniidae      | <i>Istiblennius dussumieri</i>     | BOLD:AAD0825 |
| Perciformes       | Scaridae        | <i>Scarus fuscopurpureus</i>       | BOLD:AAD0849 |
| Perciformes       | Apogonidae      | <i>Fowleria vaiulae</i>            | BOLD:AAD1017 |
| Scorpaeniformes   | Scorpaenidae    | <i>Scorpaenodes guamensis</i>      | BOLD:AAD1145 |
| Perciformes       | Haemulidae      | <i>Pomadasys commersonnii</i>      | BOLD:AAD1338 |
| Perciformes       | Haemulidae      | <i>Pomadasys olivaceus</i>         | BOLD:AAD1379 |
| Perciformes       | Labridae        | <i>Hologymnosus doliatus</i>       | BOLD:AAD1381 |
| Perciformes       | Haemulidae      | <i>Pomadasys furcatus</i>          | BOLD:AAD1382 |
| Perciformes       | Pomacanthidae   | <i>Apolemichthys trimaculatus</i>  | BOLD:AAD1935 |
| Perciformes       | Gobiidae        | <i>Trimma flammeum</i>             | BOLD:AAD2019 |
| Scorpaeniformes   | Platycephalidae | <i>Thysanophrys chiltonae</i>      | BOLD:AAD2135 |
| Perciformes       | Carangidae      | <i>Turram coeruleopinnatum</i>     | BOLD:AAD2297 |
| Perciformes       | Acanthuridae    | <i>Acanthurus tennentii</i>        | BOLD:AAD2621 |
| Perciformes       | Carangidae      | <i>Trachinotus botla</i>           | BOLD:AAD2707 |
| Tetraodontiformes | Tetraodontidae  | <i>Arothron immaculatus</i>        | BOLD:AAD2857 |
| Aulopiformes      | Synodontidae    | <i>Synodus jaculum</i>             | BOLD:AAD3379 |
| Syngnathiformes   | Centriscidae    | <i>Aeoliscus punctulatus</i>       | BOLD:AAD3585 |
| Perciformes       | Caesionidae     | <i>Dipterygonotus balteatus</i>    | BOLD:AAD3666 |
| Perciformes       | Apogonidae      | <i>Fowleria aurita</i>             | BOLD:AAD3744 |
| Perciformes       | Scaridae        | <i>Calotomus spinidens</i>         | BOLD:AAD4765 |
| Perciformes       | Apogonidae      | <i>Ostorhinchus apogonoides</i>    | BOLD:AAD5125 |
| Perciformes       | Labridae        | <i>Halichoeres nigrescens</i>      | BOLD:AAD5799 |
| Blenniiformes     | Blenniidae      | <i>Plagiotremus rhinorhynchus</i>  | BOLD:AAD5876 |
| Perciformes       | Labridae        | <i>Gomphosus caeruleus</i>         | BOLD:AAD5965 |
| Perciformes       | Carangidae      | <i>Atropus hedlandensis</i>        | BOLD:AAD6117 |
| Tetraodontiformes | Monacanthidae   | <i>Pervagor melanocephalus</i>     | BOLD:AAD6159 |
| Perciformes       | Mullidae        | <i>Parupeneus pleurostigma</i>     | BOLD:AAD6266 |
| Perciformes       | Cichlidae       | <i>Katria katria</i>               | BOLD:AAD6471 |
| Perciformes       | Haemulidae      | <i>Pomadasys kaakan</i>            | BOLD:AAD6593 |
| Perciformes       | Pinguipedidae   | <i>Parapercis hexophtalma</i>      | BOLD:AAD6753 |
| Scorpaeniformes   | Scorpaenidae    | <i>Scorpaenopsis longispina</i>    | BOLD:AAD7048 |
| Perciformes       | Pomacentridae   | <i>Dascyllus carneus</i>           | BOLD:AAD7114 |
| Perciformes       | Pomacentridae   | <i>Dascyllus carneus</i>           | BOLD:AAD7115 |
| Perciformes       | Pomacentridae   | <i>Abudefduf sparoides</i>         | BOLD:AAD7433 |
| Scorpaeniformes   | Platycephalidae | <i>Cociella heemstrai</i>          | BOLD:AAD7871 |
| Blenniiformes     | Blenniidae      | <i>Istiblennius lineatus</i>       | BOLD:AAD7943 |
| Perciformes       | Apogonidae      | <i>Ostorhinchus taeniophorus</i>   | BOLD:AAD8453 |
| Perciformes       | Labridae        | <i>Novaculoides macrolepidotus</i> | BOLD:AAD8577 |

|                   |                |                                     |              |
|-------------------|----------------|-------------------------------------|--------------|
| Perciformes       | Serranidae     | <i>Epinephelus tauvina</i>          | BOLD:AAD8799 |
| Perciformes       | Serranidae     | <i>Epinephelus longispinis</i>      | BOLD:AAD8800 |
| Perciformes       | Apogonidae     | <i>Nectamia savayensis</i>          | BOLD:AAD9453 |
| Perciformes       | Serranidae     | <i>Aethaloperca rogaa</i>           | BOLD:AAD9665 |
| Blenniiformes     | Blenniidae     | <i>Ecsenius midas</i>               | BOLD:AAE0692 |
| Perciformes       | Nomeidae       | <i>Psenes cyanophrys</i>            | BOLD:AAE0701 |
| Perciformes       | Labridae       | <i>Macropharyngodon bipartitus</i>  | BOLD:AAE0846 |
| Perciformes       | Chaetodontidae | <i>Chaetodon blackburnii</i>        | BOLD:AAE1178 |
| Perciformes       | Chaetodontidae | <i>Chaetodon xanthocephalus</i>     | BOLD:AAE1213 |
| Tetraodontiformes | Tetraodontidae | <i>Amblyrhynchotes honckenii</i>    | BOLD:AAE2039 |
| Perciformes       | Sparidae       | <i>Cheimerius nufar</i>             | BOLD:AAE2592 |
| Scorpaeniformes   | Synanceiidae   | <i>Synanceia verrucosa</i>          | BOLD:AAE2821 |
| Mugiliformes      | Mugilidae      | <i>Valamugil buchanani</i>          | BOLD:AAE3561 |
| Anguilliformes    | Muraenidae     | <i>Gymnothorax eurostus</i>         | BOLD:AAE3586 |
| Anguilliformes    | Muraenidae     | <i>Gymnothorax javanicus</i>        | BOLD:AAE3588 |
| Perciformes       | Acanthuridae   | <i>Acanthurus mata</i>              | BOLD:AAE4025 |
| Perciformes       | Acanthuridae   | <i>Acanthurus dussumieri</i>        | BOLD:AAE4046 |
| Perciformes       | Haemulidae     | <i>Plectorhinchus vittatus</i>      | BOLD:AAE4709 |
| Perciformes       | Plesiopidae    | <i>Plesiops coeruleolineatus</i>    | BOLD:AAE4785 |
| Syngnathiformes   | Syngnathidae   | <i>Hippichthys spicifer</i>         | BOLD:AAE5342 |
| Syngnathiformes   | Syngnathidae   | <i>Hippocampus hystrix</i>          | BOLD:AAE5356 |
| Perciformes       | Ambassidae     | <i>Ambassis ambassis</i>            | BOLD:AAE5575 |
| Perciformes       | Gerreidae      | <i>Gerres oblongus</i>              | BOLD:AAE6346 |
| Perciformes       | Gerreidae      | <i>Gerres longirostris</i>          | BOLD:AAE6359 |
| Anguilliformes    | Muraenidae     | <i>Gymnothorax flavimarginatus</i>  | BOLD:AAE6819 |
| Anguilliformes    | Muraenidae     | <i>Gymnothorax thyrsoideus</i>      | BOLD:AAE6837 |
| Perciformes       | Apogonidae     | <i>Verulux cypselurus</i>           | BOLD:AAE7350 |
| Perciformes       | Carangidae     | <i>Ferdauia ferdau</i>              | BOLD:AAE7640 |
| Perciformes       | Labridae       | <i>Pseudodax moluccanus</i>         | BOLD:AAE8025 |
| Perciformes       | Caesionidae    | <i>Caesio xanthonota</i>            | BOLD:AAE8330 |
| Perciformes       | Caesionidae    | <i>Pterocaesio trilineata</i>       | BOLD:AAE8473 |
| Perciformes       | Scaridae       | <i>Scarus oviceps</i>               | BOLD:AAE9524 |
| Perciformes       | Scaridae       | <i>Cetoscarus ocellatus</i>         | BOLD:AAE9711 |
| Perciformes       | Labridae       | <i>Bodianus anthioides</i>          | BOLD:AAE9952 |
| Anguilliformes    | Muraenidae     | <i>Uropterygius fuscoguttatus</i>   | BOLD:AAF0016 |
| Perciformes       | Gobiidae       | <i>Vanderhorstia ornatissima</i>    | BOLD:AAF0288 |
| Perciformes       | Acanthuridae   | <i>Acanthurus blochii</i>           | BOLD:AAF0623 |
| Syngnathiformes   | Syngnathidae   | <i>Corythoichthys haematopterus</i> | BOLD:AAF0628 |
| Perciformes       | Pomacentridae  | <i>Pomacentrus trichourus</i>       | BOLD:AAF1888 |
| Perciformes       | Nemipteridae   | <i>Nemipterus bipunctatus</i>       | BOLD:AAF2507 |
| Tetraodontiformes | Ostraciidae    | <i>Lactoria fornasini</i>           | BOLD:AAF2668 |
| Tetraodontiformes | Monacanthidae  | <i>Oxymonacanthus longirostris</i>  | BOLD:AAF3040 |
| Perciformes       | Haemulidae     | <i>Plectorhinchus playfairi</i>     | BOLD:AAF3100 |
| Perciformes       | Pomacentridae  | <i>Chromis ternatensis</i>          | BOLD:AAF3462 |
| Perciformes       | Leiognathidae  | <i>Gazza squamiventralis</i>        | BOLD:AAF4868 |

|                   |                 |                                   |              |
|-------------------|-----------------|-----------------------------------|--------------|
| Perciformes       | Gobiidae        | <i>Glossogobius callidus</i>      | BOLD:AAF5651 |
| Mugiliformes      | Mugilidae       | <i>Planiliza alata</i>            | BOLD:AAF6233 |
| Perciformes       | Acanthuridae    | <i>Zebrasoma desjardinii</i>      | BOLD:AAF6311 |
| Perciformes       | Cichlidae       | <i>Paretroplus nourissati</i>     | BOLD:AAF7575 |
| Perciformes       | Labridae        | <i>Halichoeres zeylonicus</i>     | BOLD:AAF7654 |
| Perciformes       | Lutjanidae      | <i>Lutjanus rufolineatus</i>      | BOLD:AAF7731 |
| Perciformes       | Labridae        | <i>Cymolutes praetextatus</i>     | BOLD:AAF7751 |
| Perciformes       | Labridae        | <i>Iniistius auropunctatus</i>    | BOLD:AAF8216 |
| Perciformes       | Apogonidae      | <i>Apogon crassiceps</i>          | BOLD:AAF8427 |
| Perciformes       | Gerreidae       | <i>Gerres methueni</i>            | BOLD:AAF8786 |
| Perciformes       | Pempheridae     | <i>Pempheris ibo</i>              | BOLD:AAF8820 |
| Scorpaeniformes   | Tetrarogidae    | <i>Ablabys binotatus</i>          | BOLD:AAF8834 |
| Clupeiformes      | Engraulidae     | <i>Encrasicholina punctifer</i>   | BOLD:AAF8837 |
| Perciformes       | Serranidae      | <i>Plectropomus laevis</i>        | BOLD:AAF8874 |
| Scorpaeniformes   | Platycephalidae | <i>Cociella crocodila</i>         | BOLD:AAF8895 |
| Tetraodontiformes | Tetraodontidae  | <i>Torquigener flavimaculosus</i> | BOLD:AAG3690 |
| Clupeiformes      | Engraulidae     | <i>Stolephorus indicus</i>        | BOLD:AAG4825 |
| Perciformes       | Gobiidae        | <i>Trimma naudei</i>              | BOLD:AAH1441 |
| Perciformes       | Mullidae        | <i>Upeneus guttatus</i>           | BOLD:AAH7551 |
| Perciformes       | Sparidae        | <i>Polyamblyodon gibbosum</i>     | BOLD:AAH7806 |
| Scorpaeniformes   | Scorpaenidae    | <i>Scorpaenopsis gibbosa</i>      | BOLD:AAH9714 |
| Perciformes       | Pomacentridae   | <i>Neopomacentrus fuliginosus</i> | BOLD:AAI3160 |
| Perciformes       | Pempheridae     | <i>Pempheris rubricauda</i>       | BOLD:AAI3650 |
| Tetraodontiformes | Monacanthidae   | <i>Pseudalutarius nasicornis</i>  | BOLD:AAI4531 |
| Pleuronectiformes | Soleidae        | <i>Pardachirus marmoratus</i>     | BOLD:AAI5984 |
| Scorpaeniformes   | Platycephalidae | <i>Papilloculiceps longiceps</i>  | BOLD:AAI6160 |
| Tetraodontiformes | Monacanthidae   | <i>Paramonacanthus frenatus</i>   | BOLD:AAI6357 |
| Perciformes       | Sciaenidae      | <i>Johnius fuscolineatus</i>      | BOLD:AAI7903 |
| Blenniiformes     | Blenniidae      | <i>Istiblennius spilotos</i>      | BOLD:AAI8173 |
| Blenniiformes     | Blenniidae      | <i>Ecsenius nalolo</i>            | BOLD:AAI9332 |
| Perciformes       | Labridae        | <i>Cymolutes torquatus</i>        | BOLD:AAI9445 |
| Perciformes       | Pomacentridae   | <i>Chromis opercularis</i>        | BOLD:AAJ0279 |
| Perciformes       | Apogonidae      | <i>Cheilodipterus artus</i>       | BOLD:AAJ0326 |
| Perciformes       | Gobiidae        | <i>Eviota guttata</i>             | BOLD:AAJ0340 |
| Perciformes       | Apogonidae      | <i>Ostorhinchus kiensis</i>       | BOLD:AAJ1260 |
| Perciformes       | Pomacanthidae   | <i>Apolemichthys kingi</i>        | BOLD:AAJ1293 |
| Anguilliformes    | Congridae       | <i>Ariosoma scheelei</i>          | BOLD:AAJ1709 |
| Perciformes       | Gobiidae        | <i>Amblygobius sphynx</i>         | BOLD:AAJ2321 |
| Perciformes       | Gobiidae        | <i>Amblygobius albimaculatus</i>  | BOLD:AAJ2326 |
| Perciformes       | Gobiidae        | <i>Acentrogobius audax</i>        | BOLD:AAJ2911 |
| Blenniiformes     | Blenniidae      | <i>Aspidontus taeniatus</i>       | BOLD:AAJ3002 |
| Perciformes       | Gobiidae        | <i>Koumansetta hectori</i>        | BOLD:AAJ4385 |
| Syngnathiformes   | Syngnathidae    | <i>Corythoichthys amplexus</i>    | BOLD:AAJ5559 |
| Tetraodontiformes | Tetraodontidae  | <i>Arothron mappa</i>             | BOLD:AAJ7789 |
| Perciformes       | Caesionidae     | <i>Caesio lunaris</i>             | BOLD:AAJ8622 |

|                   |                   |                                       |              |
|-------------------|-------------------|---------------------------------------|--------------|
| Perciformes       | Serranidae        | <i>Epinephelus melanostigma</i>       | BOLD:AAL5739 |
| Atheriniformes    | Atherinidae       | <i>Hypoatherina temminckii</i>        | BOLD:AAL7563 |
| Perciformes       | Gobiidae          | <i>Priolepis inhaca</i>               | BOLD:AAL8924 |
| Perciformes       | Siganidae         | <i>Siganus luridus</i>                | BOLD:AAL9467 |
| Perciformes       | Caesionidae       | <i>Gymnoaesio gymnoptera</i>          | BOLD:AAM9511 |
| Perciformes       | Callionymidae     | <i>Diplogrammus infulatus</i>         | BOLD:AAN1422 |
| Perciformes       | Serranidae        | <i>Plectropomus punctatus</i>         | BOLD:AAN4283 |
| Perciformes       | Carangidae        | <i>Carangoides dinema</i>             | BOLD:AAO5886 |
| Lophiiformes      | Antennariidae     | <i>Antennarius striatus</i>           | BOLD:AAO6018 |
| Siluriformes      | Ariidae           | <i>Plicofollis polystaphylodon</i>    | BOLD:AAP1033 |
| Perciformes       | Gobiidae          | <i>Acentrogobius nebulosus</i>        | BOLD:AAT9548 |
| Perciformes       | Apogonidae        | <i>Cheilodipterus quinquelineatus</i> | BOLD:AAT9927 |
| Perciformes       | Acanthuridae      | <i>Paracanthurus hepatus</i>          | BOLD:AAT9935 |
| Perciformes       | Apogonidae        | <i>Pristiapogon abrogramma</i>        | BOLD:AAT9989 |
| Blenniiformes     | Blenniidae        | <i>Istiblennius dussumieri</i>        | BOLD:AAU0520 |
| Perciformes       | Gobiidae          | <i>Amblygobius sphynx</i>             | BOLD:AAU0546 |
| Perciformes       | Gobiidae          | <i>Paragobiodon echinocephalus</i>    | BOLD:AAU0675 |
| Ophidiiformes     | Dinematichthyidae | <i>Dinematichthys ilucoeteoides</i>   | BOLD:AAU0679 |
| Ophidiiformes     | Dinematichthyidae | <i>Dinematichthys ilucoeteoides</i>   | BOLD:AAU0680 |
| Perciformes       | Pseudochromidae   | <i>Pseudochromis kristinae</i>        | BOLD:AAU0693 |
| Perciformes       | Apogonidae        | <i>Fowleria marmorata</i>             | BOLD:AAU0944 |
| Perciformes       | Labridae          | <i>Halichoeres timorensis</i>         | BOLD:AAU1265 |
| Anguilliformes    | Chlopsidae        | <i>Kaupichthys diodontus</i>          | BOLD:AAU1276 |
| Perciformes       | Plesiopidae       | <i>Calloplesiops altivelis</i>        | BOLD:AAU1587 |
| Perciformes       | Gobiidae          | <i>Gobiodon citrinus</i>              | BOLD:AAU1860 |
| Perciformes       | Gobiidae          | <i>Asterropteryx ensifera</i>         | BOLD:AAU2443 |
| Perciformes       | Tripterygiidae    | <i>Enneapterygius tutuilae</i>        | BOLD:AAU2923 |
| Blenniiformes     | Blenniidae        | <i>Meiacanthus mossambicus</i>        | BOLD:AAU2956 |
| Perciformes       | Pseudochromidae   | <i>Pseudochromis tauberae</i>         | BOLD:AAU3302 |
| Perciformes       | Scaridae          | <i>Scarus tricolor</i>                | BOLD:AAU3375 |
| Pleuronectiformes | Soleidae          | <i>Pardachirus morrowi</i>            | BOLD:AAU3475 |
| Blenniiformes     | Blenniidae        | <i>Blenniella periophthalmus</i>      | BOLD:AAU4015 |
| Perciformes       | Gobiidae          | <i>Callogobius sp. Madagascar</i>     | BOLD:AAU4384 |
| Perciformes       | Pinguipedidae     | <i>Parapercis xanthozona</i>          | BOLD:AAV2783 |
| Tetraodontiformes | Monacanthidae     | <i>Paramonacanthus pusillus</i>       | BOLD:AAV6227 |
| Perciformes       | Gobiidae          | <i>Eviota indica</i>                  | BOLD:AAV7156 |
| Syngnathiformes   | Syngnathidae      | <i>Hippichthys cyanospilos</i>        | BOLD:AAV7178 |
| Perciformes       | Apogonidae        | <i>Apogon caudicinctus</i>            | BOLD:AAV9836 |
| Perciformes       | Gobiidae          | <i>Amblyeleotris diagonalis</i>       | BOLD:AAV9966 |
| Ophidiiformes     | Carapidae         | <i>Carapus mourlani</i>               | BOLD:AAW8146 |
| Syngnathiformes   | Syngnathidae      | <i>Hippocampus camelopardalis</i>     | BOLD:AAX0875 |
| Perciformes       | Leiognathidae     | <i>Equulites sp. Madagascar</i>       | BOLD:AAX8534 |
| Anguilliformes    | Muraenidae        | <i>Gymnothorax sp. Madagascar</i>     | BOLD:AAY2566 |
| Perciformes       | Apogonidae        | <i>Gymnapogon africanus</i>           | BOLD:AAY2589 |
| Perciformes       | Gobiidae          | <i>Eviota distigma</i>                | BOLD:AAY4525 |



|                    |                 |                                       |              |
|--------------------|-----------------|---------------------------------------|--------------|
| Perciformes        | Labridae        | <i>Pteragogus flagellifer</i>         | BOLD:AAZ4093 |
| Perciformes        | Apogonidae      | <i>Cheilodipterus quinquelineatus</i> | BOLD:ABU8169 |
| Perciformes        | Apogonidae      | <i>Foa fo</i>                         | BOLD:ABU8856 |
| Perciformes        | Apogonidae      | <i>Apogonichthys perdix</i>           | BOLD:ABU8857 |
| Perciformes        | Kyphosidae      | <i>Kyphosus cinerascens</i>           | BOLD:ABX5727 |
| Perciformes        | Pomacentridae   | <i>Neopomacentrus cyanomos</i>        | BOLD:ABX6100 |
| Perciformes        | Labridae        | <i>Wetmorella nigropinnata</i>        | BOLD:ABX6253 |
| Aulopiformes       | Synodontidae    | <i>Trachinocephalus myops</i>         | BOLD:ABX6347 |
| Perciformes        | Scaridae        | <i>Scarus ghobban</i>                 | BOLD:ABY4451 |
| Perciformes        | Lethrinidae     | <i>Lethrinus lentjan</i>              | BOLD:ABZ0131 |
| Perciformes        | Pomacentridae   | <i>Amphiprion akallopisos</i>         | BOLD:ABZ5228 |
| Perciformes        | Eleotridae      | <i>Typhleotris pauliani</i>           | BOLD:ACB4014 |
| Perciformes        | Eleotridae      | <i>Typhleotris madagascariensis</i>   | BOLD:ACB5663 |
| Perciformes        | Gobiidae        | <i>Glossogobius callidus</i>          | BOLD:ACB6179 |
| Perciformes        | Gobiidae        | <i>Glossogobius ankaranensis</i>      | BOLD:ACB6427 |
| Perciformes        | Pomacentridae   | <i>Abudefduf natalensis</i>           | BOLD:ACC0201 |
| Perciformes        | Apogonidae      | <i>Apogon erythrosoma</i>             | BOLD:ACC5690 |
| Beryciformes       | Holocentridae   | <i>Myripristis berndti</i>            | BOLD:ACE3002 |
| Perciformes        | Serranidae      | <i>Epinephelus flavocaeruleus</i>     | BOLD:ACE3678 |
| Perciformes        | Labridae        | <i>Hemigymnus fasciatus</i>           | BOLD:ACE5917 |
| Syngnathiformes    | Syngnathidae    | <i>Hippocampus kuda</i>               | BOLD:ACE6993 |
| Perciformes        | Leiognathidae   | <i>Secutor insidiator</i>             | BOLD:ACF0053 |
| Perciformes        | Gobiidae        | <i>Gobiodon proluxus</i>              | BOLD:ACF0653 |
| Perciformes        | Chaetodontidae  | <i>Chaetodon falcula</i>              | BOLD:ACF1258 |
| Perciformes        | Carangidae      | <i>Caranx papuensis</i>               | BOLD:ACF4541 |
| Perciformes        | Pomacentridae   | <i>Amphiprion latifasciatus</i>       | BOLD:ACF5591 |
| Syngnathiformes    | Solenostomidae  | <i>Solenostomus cyanopterus</i>       | BOLD:ACG8874 |
| Perciformes        | Kuhliidae       | <i>Kuhlia sauvagii</i>                | BOLD:ACI1006 |
| Anguilliformes     | Muraenesocidae  | <i>Muraenesox bagio</i>               | BOLD:ACK7558 |
| Anguilliformes     | Muraenidae      | <i>Gymnothorax zonipectis</i>         | BOLD:ACK7703 |
| Perciformes        | Cichlidae       | <i>Oreochromis urolepis</i>           | BOLD:ACR7163 |
| Perciformes        | Apogonidae      | <i>Ostorhinchus gularis</i>           | BOLD:ACS5956 |
| Perciformes        | Labridae        | <i>Iniistius bimaculatus</i>          | BOLD:ACT0048 |
| Anguilliformes     | Muraenidae      | <i>Gymnothorax griseus</i>            | BOLD:ACU5684 |
| Perciformes        | Mullidae        | <i>Upeneus vittatus</i>               | BOLD:ACV4665 |
| Cyprinodontiformes | Aplocheilidae   | <i>Pachypanchax sakaramyi</i>         | BOLD:ACV6463 |
| Perciformes        | Blenniidae      | <i>Salarias fasciatus</i>             | BOLD:ACV7965 |
| Perciformes        | Teraponidae     | <i>Terapon jarbua</i>                 | BOLD:ACV8977 |
| Cyprinodontiformes | Aplocheilidae   | <i>Pachypanchax arnoulti</i>          | BOLD:ACV9996 |
| Scorpaeniformes    | Platycephalidae | <i>Rogadius pristiger</i>             | BOLD:ACY6212 |
| Perciformes        | Carangidae      | <i>Pseudocaranx dentex</i>            | BOLD:ACY7211 |
| Perciformes        | Apogonidae      | <i>Neamia octospina</i>               | BOLD:ACY8539 |
| Aulopiformes       | Synodontidae    | <i>Trachinocephalus myops</i>         | BOLD:ACY8623 |
| Perciformes        | Callionymidae   | <i>Callionymus filamentosus</i>       | BOLD:ACZ1215 |
| Tetraodontiformes  | Balistidae      | <i>Pseudobalistes fuscus</i>          | BOLD:ACZ6203 |

|                   |                |                                      |              |
|-------------------|----------------|--------------------------------------|--------------|
| Anguilliformes    | Muraenidae     | <i>Gymnothorax isingteena</i>        | BOLD:ADB3872 |
| Perciformes       | Scaridae       | <i>Scarus rivulatus</i>              | BOLD:ADB4663 |
| Tetraodontiformes | Tetraodontidae | <i>Lagocephalus guentheri</i>        | BOLD:ADG5739 |
| Perciformes       | Cichlidae      | <i>Oreochromis mossambicus</i>       | BOLD:ADI0792 |
| Perciformes       | Acanthuridae   | <i>Zanclus cornutus</i>              | BOLD:ADI3027 |
| Perciformes       | Labridae       | <i>Pteragogus trispilus</i>          | BOLD:ADI3844 |
| Perciformes       | Labridae       | <i>Thalassoma amblycephalum</i>      | BOLD:ADI4249 |
| Perciformes       | Carangidae     | <i>Decapterus macrosoma</i>          | BOLD:ADI4344 |
| Perciformes       | Scaridae       | <i>Calotomus carolinus</i>           | BOLD:ADI4703 |
| Ophidiiformes     | Carapidae      | <i>Encheliophis vermiops</i>         | BOLD:ADK1086 |
| Perciformes       | Serranidae     | <i>Epinephelus coeruleopunctatus</i> | BOLD:ADL0994 |
| Perciformes       | Labridae       | <i>Epibulus insidiator</i>           | BOLD:ADU6797 |
| Scorpaeniformes   | Apistidae      | <i>Apistus carinatus</i>             | BOLD:ADW6368 |
| Perciformes       | Eleotridae     | <i>Typhleotris pauliani</i>          | BOLD:ADX3406 |
| Perciformes       | Gobiidae       | <i>Sicyopterus punctissimus</i>      | BOLD:AEB2141 |
| Perciformes       | Gobiidae       | <i>Sicyopterus franouxi</i>          | BOLD:AEB4723 |
| Beryciformes      | Holocentridae  | <i>Sargocentron caudimaculatum</i>   | BOLD:AEN0495 |
| Perciformes       | Acanthuridae   | <i>Naso annulatus</i>                | BOLD:AEN2475 |
