# Supplementary material
Source: MDPI journal article supplement (https://www.mdpi.com/1424-2818/14/5/377)
Supplement: s1 [file s1]

**Table S2.** List of species captured by light traps and mosquito seine nets during austral warm seasons. The species are organized according to Nelson (2006). Total abundances are reported for each sampling gear as well as the number of successfully barcoded specimens.

| ORDER_Nelson_2006 | FAMILY_Eschmeyer | Genus species                          | BIN            | Light trap | Mosquito seine net | Successfully barcoded |
|-------------------|------------------|----------------------------------------|----------------|------------|--------------------|-----------------------|
| ELOPIFORMES       | MEGALOPIDAE      | <i>Megalops cyprinoides</i>            | BOLD:AAC4501   | 2          | 0                  | 1                     |
| ALBULIFORMES      | ALBULIDAE        | Albulidae sp1 (COLOR)                  |                | 3          | 0                  |                       |
| ANGUILLIFORMES    | MURAENIDAE       | Muraenidae sp2 (COLOR)                 |                | 7          | 0                  |                       |
|                   |                  | Muraenidae sp3 (COLOR)                 |                | 5          | 0                  |                       |
|                   | CONGRIDAE        | <i>Ariosoma scheelei</i>               | BOLD:AAJ1709   | 18         | 2                  | 8                     |
|                   |                  | Congridae [BOLD:ACV7958]               | BOLD:ACV7958   | 3          | 0                  | 1                     |
|                   |                  | Congridae sp1 (COLOR)                  |                | 1          | 0                  |                       |
|                   |                  | Congridae_gen sp_1HJ                   |                | 2          | 0                  |                       |
|                   |                  | Congridae_gen sp_2HJ                   |                | 1          | 0                  |                       |
| CLUPEIFORMES      | ENGRAULIDAE      | <i>Stolephorus</i> [BOLD:AAG4825]      | BOLD:AAG4825   | 13         | 1482               | 2                     |
|                   | CLUPEIDAE        | Clupeidae [BOLD:ACV7999]               | BOLD:ACV7999*  | 1130       | 0                  | 3                     |
|                   |                  | Clupeidae sp3 (COLOR)                  |                | 21         | 0                  |                       |
|                   |                  | Clupeidae [BOLD:ADI4531]               | BOLD:ADI4531*  | 0          | 123                | 1                     |
|                   |                  | <i>Herklotsichthys quadrimaculatus</i> | BOLD:AAC2887   | 2757       | 789                | 3                     |
| SILURIFORMES 31   | PLOTOSIDAE       | <i>Plotosus</i> [BOLD:ACF3921]         | BOLD:ACF3921** | 0          | 1084               | 3                     |
| AULOPIFORMES 39   | SYNODONTIDAE     | <i>Saurida</i> [BOLD:AAH0503]          | BOLD:AAH0503   | 0          | 344                | 5                     |
|                   |                  | <i>Saurida</i> sp_3HJ                  |                | 0          | 30                 |                       |
|                   |                  | Synodontinae [BOLD:ADO5473]            | BOLD:ADO5473*  | 2          | 0                  | 1                     |
|                   |                  | <i>Synodus</i> [BOLD:ACD1807]          | BOLD:ACD1807   | 5          | 0                  | 2                     |
|                   |                  | <i>Synodus</i> [BOLD:AAB5069]          | BOLD:AAB5069** | 6          | 23                 | 2                     |
|                   |                  | <i>Trachinocephalus myops</i>          | BOLD:ACY8623   | 12         | 0                  | 1                     |
|                   |                  | <i>Trachinocephalus</i> [BOLD:AAA9578] | BOLD:AAA9578   | 1          | 3                  | 2                     |
|                   |                  | <i>Trachinocephalus</i> [BOLD:ABX6347] | BOLD:ABX6347   | 5          | 23                 | 3                     |
| ATHERINIFORMES    | ATHERINIDAE      | <i>Atherinomorus lacunosus</i>         | BOLD:ACK7521** | 32270      | 0                  | 2                     |

\* New BIN for BOLD

\*\* New BIN for Madagascar

**Table S2:** (continued)

| ORDER_Nelson_2006 | FAMILY_Eschmeyer | Genus species                        | BIN            | Light trap | Mosquito seine net | Successfully barcoded |
|-------------------|------------------|--------------------------------------|----------------|------------|--------------------|-----------------------|
| ATHERINIFORMES    | ATHERINIDAE      | <i>Hypoatherina</i> [BOLD:AAL7563]   | BOLD:AAL7563   | 4          | 0                  | 1                     |
|                   |                  | <i>Hypoatherina</i> [BOLD:ACV9758]   | BOLD:ACV9758   | 4514       | 0                  | 3                     |
| LOPHIIFORMES      | ANTENNARIIDAE    | <i>Antennarius</i> [BOLD:AAO6018]    | BOLD:AAO6018   | 0          | 5                  | 3                     |
|                   |                  | <i>Histrio histrio</i>               |                | 0          | 1                  |                       |
| BELONIFORMES      | HEMIRAMPHIDAE    | <i>Hemiramphus</i> [BOLD:AAC0565]    | BOLD:AAC0565** | 1          | 172                | 4                     |
|                   |                  | <i>Hyporhamphus affinis</i>          | BOLD:AAD0579   | 2          | 1                  | 3                     |
|                   | BELONIDAE        | <i>Tylosurus</i> [BOLD:AAC4148]      | BOLD:AAC4148   | 1          | 16                 | 5                     |
|                   |                  | <i>Tylosurus</i> sp_1HJ              |                | 2          | 0                  |                       |
| BERYCIFORMES      | HOLOCENTRIDAE    | <i>Myripristis</i> [BOLD:AAA9764]    | BOLD:AAA9764   | 1          | 0                  | 1                     |
|                   |                  | <i>Neonippon</i> [BOLD:AAC8278]      | BOLD:AAC8278   | 24         | 0                  | 4                     |
|                   |                  | <i>Sargocentron</i> [BOLD:AAB3424]   | BOLD:AAB3424   | 18         | 0                  | 6                     |
|                   |                  | <i>Sargocentron praslin</i>          | BOLD:AAC4647** | 2          | 0                  | 1                     |
|                   |                  | <i>Sargocentron punctatissimum</i>   |                | 3          | 0                  |                       |
| SYNGNATHIFORMES   | PEGASIDAE        | <i>Eurypegasus</i> [BOLD:ADO3945]    | BOLD:ADO3945*  | 0          | 1                  | 1                     |
|                   | SOLENOSTOMIDAE   | <i>Solenostomus cyanopterus</i>      | BOLD:ACG8874   | 0          | 8                  | 3                     |
|                   | SYNGNATHIDAE     | <i>Corythoichthys</i> [BOLD:AAI8860] | BOLD:AAI8860** | 457        | 0                  | 5                     |
|                   |                  | <i>Corythoichthys haematopterus</i>  | BOLD:AAF0628   | 133        | 11                 | 6                     |
|                   |                  | <i>Hippichthys</i> [BOLD:AAE5342]    | BOLD:AAE5342   | 13         | 0                  | 4                     |
|                   |                  | <i>Hippichthys</i> sp_1HJ            |                | 0          | 2                  |                       |
|                   |                  | <i>Hippocampus</i> [BOLD:ADN8353]    | BOLD:ADN8353*  | 0          | 1                  | 1                     |
|                   |                  | <i>Hippocampus</i> [BOLD:ADO5537]    | BOLD:ADO5537*  | 0          | 1                  | 1                     |
|                   |                  | <i>Hippocampus camelopardalis</i>    | BOLD:AAX0875   | 3          | 27                 | 16                    |
|                   |                  | <i>Hippocampus</i> [BOLD:AAE5356]    | BOLD:AAE5356   | 0          | 2                  | 1                     |
|                   |                  | <i>Hippocampus</i> [BOLD:ACE6993]    | BOLD:ACE6993   | 1          | 4                  | 4                     |
|                   |                  | <i>Hippocampus</i> sp_10HJ           |                | 0          | 1                  |                       |
|                   |                  | <i>Hippocampus</i> sp_14HJ           |                | 0          | 1                  |                       |
|                   |                  | <i>Hippocampus</i> sp_16HJ           |                | 1          | 0                  |                       |
|                   |                  | <i>Hippocampus</i> sp_17HJ           |                | 0          | 2                  |                       |
|                   |                  | Syngnathidae [BOLD:ADI1740]          | BOLD:ADI1740*  | 0          | 96                 | 6                     |
|                   |                  | Syngnathidae sp8 (COLOR)             |                | 1          | 0                  |                       |

\*\* New BIN for Madagascar

\* New BIN for BOLD

Table S2: (continued)

| ORDER_Nelson_2006 | FAMILY_Eschmeyer | Genus species                        | BIN            | Light trap | Mosquito seine net | Successfully barcoded |
|-------------------|------------------|--------------------------------------|----------------|------------|--------------------|-----------------------|
| SYNGNATHIFORMES   | SYNGNATHIDAE     | Syngnathidae sp9 (COLOR)             |                | 14         | 0                  |                       |
|                   |                  | Syngnathidae_gen sp_10HJ             |                | 0          | 435                |                       |
|                   |                  | Syngnathidae_gen sp_11HJ             |                | 0          | 1                  |                       |
|                   |                  | Syngnathidae_gen sp_12HJ             |                | 3          | 130                |                       |
|                   |                  | Syngnathidae_gen sp_13HJ             |                | 1          | 0                  |                       |
|                   |                  | Syngnathidae_gen sp_14HJ             |                | 3          | 0                  |                       |
|                   |                  | Syngnathidae_gen sp_15HJ             |                | 0          | 1                  |                       |
|                   |                  | Syngnathidae_gen sp_1HJ              |                | 1          | 73                 |                       |
|                   |                  | Syngnathidae_gen sp_2HJ              |                | 0          | 113                |                       |
|                   |                  | <i>Trachyrhamphus</i> [BOLD:ADG5410] | BOLD:ADG5410   | 0          | 3                  | 2                     |
| SCORPAENIFORMES   | AULOSTOMIDAE     | <i>Aulostomus chinensis</i>          |                | 0          | 5                  |                       |
|                   | FISTULARIIDAE    | <i>Fistularia commersonii</i>        | BOLD:AAB5992   | 48         | 929                | 1                     |
|                   | CENTRISCIDAE     | <i>Aeoliscus punctulatus</i>         | BOLD:AAD3585   | 1          | 765                | 1                     |
|                   | DACTYLOPTERIDAE  | <i>Dactyloptena</i> [BOLD:AAB5966]   | BOLD:AAB5966   | 4          | 11                 | 5                     |
|                   | SCORPAENIDAE     | <i>Dendrochirus</i> [BOLD:AAC9564]   | BOLD:AAC9564   | 2          | 1                  | 3                     |
|                   |                  | <i>Pterois miles</i>                 | BOLD:AAB8146** | 3          | 0                  | 2                     |
|                   |                  | <i>Pterois</i> sp_1HJ                |                | 0          | 3                  |                       |
|                   |                  | <i>Pterois</i> sp_4HJ                |                | 0          | 1                  |                       |
|                   |                  | Scorpaenidae [BOLD:AAU1214]          | BOLD:AAU1214   | 3          | 2                  | 3                     |
|                   |                  | Scorpaenidae sp5 (COLOR)             |                | 1          | 0                  |                       |
|                   |                  | Scorpaenidae sp9 (COLOR)             |                | 1          | 0                  |                       |
|                   |                  | Scorpaenidae_gen sp_2HJ              |                | 5          | 0                  |                       |
|                   |                  | <i>Sebastapistes</i> [BOLD:AAC4542]  | BOLD:AAC4542   | 5          | 10                 | 6                     |
|                   |                  | <i>Sebastapistes</i> [BOLD:AAC4543]  | BOLD:AAC4543   | 49         | 202                | 30                    |
|                   | TETRAROGIDAE     | <i>Ablabys binotatus</i>             | BOLD:AAF8834   | 0          | 4                  | 2                     |
|                   |                  | <i>Ablabys taenionotus</i>           |                | 0          | 5                  |                       |
|                   | SYNANCEIIDAE     | <i>Synanceia</i> [BOLD:AAE2821]      | BOLD:AAE2821   | 1          | 0                  | 1                     |
|                   | PLATYCEPHALIDAE  | <i>Papilloculiceps longiceps</i>     | BOLD:AAI6160   | 0          | 69                 | 12                    |
|                   |                  | Platycephalidae [BOLD:ACY6212]       | BOLD:ACY6212   | 2          | 55                 | 8                     |
|                   |                  | Platycephalidae_gen sp_3HJ           |                | 0          | 1                  |                       |
| PERCIFORMES       | SERRANIDAE       | <i>Epinephelus areolatus</i>         | BOLD:AAA9822   | 1          | 0                  | 1                     |
|                   |                  | <i>Epinephelus</i> [BOLD:AAD1767]    | BOLD:AAD1767** | 0          | 1                  | 1                     |

\*\* New BIN for Madagascar

Table S2: (continued)

| ORDER_Nelson_2006 | FAMILY_Eschmeyer | Genus species                         | BIN            | Light trap | Mosquito seine net | Successfully barcoded |
|-------------------|------------------|---------------------------------------|----------------|------------|--------------------|-----------------------|
| PERCIFORMES       | SERRANIDAE       | <i>Epinephelus</i> [BOLD:ACZ9919]     | BOLD:ACZ9919** | 0          | 2                  | 2                     |
|                   |                  | <i>Epinephelus</i> sp_1HJ             |                | 0          | 1                  |                       |
|                   |                  | <i>Epinephelus</i> sp_3HJ             |                | 0          | 3                  |                       |
|                   |                  | <i>Plectropomus punctatus</i>         | BOLD:AAN4283   | 9          | 0                  | 2                     |
|                   | PSEUDOCROMIDAE   | <i>Halidesmus</i> [BOLD:AAU1500]      | BOLD:AAU1500** | 8          | 0                  | 1                     |
|                   |                  | <i>Pseudochromis madagascariensis</i> | BOLD:AAU3299** | 45         | 0                  | 3                     |
|                   |                  | <i>Pseudochromis</i> [BOLD:ADI5215]   | BOLD:ADI5215*  | 0          | 40                 | 3                     |
|                   | PLESIOPIDAE      | <i>Plesiops</i> [BOLD:AAE4785]        | BOLD:AAE4785   | 171        | 0                  | 3                     |
|                   | PRIACANTHIDAE    | <i>Priacanthus hamrur</i>             | BOLD:AAB1643** | 0          | 88                 | 4                     |
|                   |                  | <i>Priacanthus</i> sp_1HJ             |                | 2          | 0                  |                       |
|                   | APOGONIDAE       | <i>Apogon</i> [BOLD:AAF8427]          | BOLD:AAF8427   | 3          | 0                  | 3                     |
|                   |                  | <i>Apogon</i> [BOLD:ACC5690]          | BOLD:ACC5690   | 28         | 0                  | 5                     |
|                   |                  | <i>Apogon</i> [BOLD:ACW9154]          | BOLD:ACW9154   | 7          | 0                  | 3                     |
|                   |                  | <i>Apogon</i> [BOLD:AAJ8751]          | BOLD:AAJ8751** | 29         | 0                  | 3                     |
|                   |                  | <i>Apogon</i> [BOLD:AAU1535]          | BOLD:AAU1535** | 0          | 22                 | 1                     |
|                   |                  | <i>Apogon</i> [BOLD:AAD2206]          | BOLD:AAD2206** | 34         | 0                  | 3                     |
|                   |                  | <i>Apogonichthys ocellatus</i>        |                | 1          | 0                  |                       |
|                   |                  | <i>Apogonichthys perdix</i>           | BOLD:ABU8857   | 758        | 21                 | 16                    |
|                   |                  | Apogonidae [BOLD:ACV6948]             | BOLD:ACV6948   | 221        | 0                  | 17                    |
|                   |                  | Apogonidae [BOLD:ACW8182]             | BOLD:ACW8182   | 2          | 0                  | 2                     |
|                   |                  | Apogonidae [BOLD:ACY1702]             | BOLD:ACY1702   | 6          | 0                  | 3                     |
|                   |                  | Apogonidae [BOLD:ADI1552]             | BOLD:ADI1552*  | 0          | 277                | 1                     |
|                   |                  | Apogonidae [BOLD:ADN3788]             | BOLD:ADN3788*  | 9          | 0                  | 1                     |
|                   |                  | Apogonidae [BOLD:ADO4802]             | BOLD:ADO4802*  | 2          | 0                  | 1                     |
|                   |                  | Apogonidae sp41 (COLOR)               |                | 1          | 0                  |                       |
|                   |                  | Apogonidae sp43 (COLOR)               |                | 1          | 0                  |                       |
|                   |                  | Apogonidae_gen sp_1HJ                 |                | 3          | 0                  |                       |
|                   |                  | <i>Cheilodipterus</i> [BOLD:ABU8169]  | BOLD:ABU8169   | 0          | 185                | 3                     |
|                   |                  | <i>Foa fo</i>                         | BOLD:ABU8856   | 0          | 289                | 1                     |

\* New BIN for BOLD

\*\* New BIN for Madagascar

**Table S2:** (continued)

| ORDER_Nelson_2006 | FAMILY_Eschmeyer | Genus species                      | BIN            | Light trap | Mosquito seine net | Successfully barcoded |
|-------------------|------------------|------------------------------------|----------------|------------|--------------------|-----------------------|
| PERCIFORMES       | APOGONIDAE       | <i>Fowleria</i> [BOLD:AAD8726]     | BOLD:AAD8726** | 32         | 0                  | 9                     |
|                   |                  | <i>Neamia octospina</i>            | BOLD:ACY8539   | 1          | 0                  | 1                     |
|                   |                  | <i>Nectamia</i> [BOLD:AAL9262]     | BOLD:AAL9262** | 210        | 0                  | 9                     |
|                   |                  | <i>Nectamia</i> [BOLD:AAD9453]     | BOLD:AAD9453   | 2          | 0                  | 2                     |
|                   |                  | <i>Ostorhinchus</i> [BOLD:AAD5600] | BOLD:AAD5600** | 1          | 0                  | 1                     |
|                   |                  | <i>Ostorhinchus</i> [BOLD:AAJ1260] | BOLD:AAJ1260   | 12         | 0                  | 3                     |
|                   |                  | <i>Ostorhinchus</i> [BOLD:ACV9601] | BOLD:ACV9601*  | 34         | 340                | 12                    |
|                   |                  | <i>Ostorhinchus angustatus</i>     | BOLD:AAD5116** | 179        | 0                  | 2                     |
|                   |                  | <i>Ostorhinchus</i> [BOLD:ACE9301] | BOLD:ACE9301** | 14         | 0                  | 1                     |
|                   |                  | <i>Ostorhinchus</i> [BOLD:AAC2084] | BOLD:AAC2084** | 581        | 45                 | 11                    |
|                   |                  | <i>Ostorhinchus</i> [BOLD:AAD8453] | BOLD:AAD8453   | 30         | 0                  | 1                     |
|                   |                  | <i>Ostorhinchus</i> [BOLD:AAD8454] | BOLD:AAD8454** | 210        | 47                 | 5                     |
|                   |                  | <i>Ostorhinchus flagelliferus</i>  | BOLD:AAJ1254** | 2          | 0                  | 2                     |
|                   |                  | <i>Ostorhinchus gularis</i>        | BOLD:ACS5956   | 9          | 0                  | 2                     |
|                   |                  | <i>Pristiapogon</i> [BOLD:AAJ1264] | BOLD:AAJ1264** | 1          | 0                  | 1                     |
|                   |                  | <i>Pristiapogon</i> [BOLD:AAB4082] | BOLD:AAB4082** | 5          | 0                  | 2                     |
|                   |                  | <i>Taeniamia flavofasciata</i>     | BOLD:AAU1539** | 1          | 807                | 4                     |
|                   |                  | <i>Zoramia fragilis</i>            | BOLD:AAB8394** | 20         | 6                  | 7                     |
|                   | CARANGIDAE       | <i>Alectis ciliaris</i>            | BOLD:AAB7827   | 0          | 1                  | 1                     |
|                   |                  | <i>Atropus hedlandensis</i>        | BOLD:AAD6117   | 0          | 1                  | 1                     |
|                   |                  | <i>Atule mate</i>                  | BOLD:AAB3382** | 10         | 1                  | 3                     |
|                   |                  | <i>Caranx ignobilis</i>            | BOLD:AAB0587   | 2          | 20                 | 4                     |
|                   |                  | <i>Caranx melampygus</i>           | BOLD:AAB0585   | 0          | 4                  | 3                     |
|                   |                  | <i>Caranx sexfasciatus</i>         | BOLD:AAB0584** | 2          | 1                  | 2                     |
|                   |                  | <i>Ferduaia ferdau</i>             | BOLD:AAE7640   | 1          | 0                  | 1                     |
|                   |                  | <i>Gnathanodon speciosus</i>       | BOLD:AAB7462   | 1          | 0                  | 1                     |
|                   |                  | <i>Platyccarx chrysophrys</i>      | BOLD:AAB2977   | 0          | 1                  | 1                     |
|                   |                  | <i>Tururum coeruleopinnatum</i>    | BOLD:AAD2297   | 0          | 3                  | 2                     |
|                   |                  | <i>Tururum fulvoguttatum</i>       | BOLD:AAC2745   | 0          | 6                  | 1                     |

\*\* New BIN for Madagascar

**Table S2:** (continued)

| ORDER_Nelson_2006 | FAMILY_Eschmeyer | Genus species                        | BIN            | Light trap | Mosquito seine net | Successfully barcoded |
|-------------------|------------------|--------------------------------------|----------------|------------|--------------------|-----------------------|
| PERCIFORMES       | CARANGIDAE       | <i>Scomberoides lysan</i>            | BOLD:AAB0512** | 0          | 10                 | 5                     |
|                   |                  | <i>Scomberoides</i> sp_3HJ           |                | 0          | 1                  |                       |
|                   |                  | <i>Selar</i> [BOLD:AAB0871]          | BOLD:AAB0871** | 1          | 0                  | 1                     |
|                   | LEIOGNATHIDAE    | <i>Aurigequula fasciata</i>          |                | 1          | 0                  |                       |
|                   |                  | <i>Equulites klunzingeri</i>         | BOLD:AAC0238** | 0          | 1326               | 1                     |
|                   |                  | <i>Gazza</i> [BOLD:AAB7096]          | BOLD:AAB7096** | 0          | 14                 | 1                     |
|                   | LUTJANIDAE       | <i>Lutjanus argentimaculatus</i>     | BOLD:AAB2440   | 1          | 0                  | 1                     |
|                   |                  | <i>Lutjanus</i> [BOLD:AAA8168]       | BOLD:AAA8168   | 0          | 3                  | 1                     |
|                   |                  | <i>Lutjanus fulvivflamma</i>         | BOLD:ADF5681** | 641        | 33                 | 8                     |
|                   |                  | <i>Lutjanus gibbus</i>               | BOLD:AAB3276** | 28         | 127                | 5                     |
|                   |                  | <i>Lutjanus monostigma</i>           | BOLD:AAB2907   | 1          | 0                  | 1                     |
|                   |                  | <i>Lutjanus notatus</i>              | BOLD:AAF7731   | 12         | 373                | 3                     |
|                   | CAESIONIDAE      | <i>Caesio</i> [BOLD:AAB4822]         | BOLD:AAB4822** | 0          | 103                | 1                     |
|                   |                  | <i>Caesio</i> [BOLD:AAB4823]         | BOLD:AAB4823** | 98         | 200                | 7                     |
|                   |                  | <i>Dipterygonotus balteatus</i>      | BOLD:AAD3666   | 3          | 0                  | 1                     |
|                   | GERREIDAE        | <i>Gerres</i> [BOLD:AAC0377]         | BOLD:AAC0377** | 0          | 448                | 1                     |
|                   |                  | <i>Gerres</i> [BOLD:AAE6359]         | BOLD:AAE6359   | 0          | 3                  | 2                     |
|                   |                  | <i>Gerres</i> [BOLD:AAC1291]         | BOLD:AAC1291** | 0          | 1                  | 1                     |
|                   |                  | <i>Gerres oblongus</i>               | BOLD:AAE6346   | 0          | 2                  | 2                     |
|                   | HAEMULIDAE       | <i>Diagramma</i> [BOLD:AAD4477]      | BOLD:AAD4477** | 0          | 27                 | 3                     |
|                   |                  | <i>Diagramma labiosum</i>            |                | 0          | 1                  |                       |
|                   |                  | <i>Plectorhinchus</i> [BOLD:AAF8797] | BOLD:AAF8797** | 1          | 0                  | 1                     |
|                   |                  | <i>Plectorhinchus flavomaculatus</i> | BOLD:AAC4020** | 0          | 19                 | 5                     |
|                   |                  | <i>Plectorhinchus gaterinus</i>      | BOLD:AAH9156** | 0          | 718                | 3                     |
|                   | NEMIPTERIDAE     | <i>Scolopsis bimaculata</i>          | BOLD:AAD6249** | 0          | 8                  | 3                     |
|                   |                  | <i>Scolopsis ghanam</i>              | BOLD:AAC4767** | 0          | 21                 | 3                     |
|                   | LETHRINIDAE      | <i>Gymnocranius elongatus</i>        | BOLD:AAB5194** | 0          | 3                  | 2                     |
|                   |                  | Lethrinidae [BOLD:ADI4867]           | BOLD:ADI4867*  | 0          | 148                | 1                     |

\*\* New BIN for Madagascar

\* New BIN for BOLD

**Table S2:** (continued)

| ORDER_Nelson_2006 | FAMILY_Eschmeyer | Genus species                       | BIN            | Light trap | Mosquito seine net | Successfully barcoded |
|-------------------|------------------|-------------------------------------|----------------|------------|--------------------|-----------------------|
| PERCIFORMES       | LETHRINIDAE      | <i>Lethrinus</i> [BOLD:AAB0511]     | BOLD:AAB0511** | 670        | 1464               | 43                    |
|                   |                  | <i>Lethrinus</i> [BOLD:AAC1547]     | BOLD:AAC1547   | 0          | 8                  | 3                     |
|                   |                  | <i>Lethrinus</i> [BOLD:AAC8078]     | BOLD:AAC8078   | 0          | 224                | 17                    |
|                   |                  | <i>Lethrinus</i> [BOLD:ADI2486]     | BOLD:ADI2486*  | 0          | 6                  | 1                     |
|                   |                  | <i>Lethrinus</i> [BOLD:ADN4720]     | BOLD:ADN4720*  | 0          | 3                  | 1                     |
|                   |                  | <i>Lethrinus</i> [BOLD:ADN9632]     | BOLD:ADN9632*  | 0          | 1                  | 1                     |
|                   |                  | <i>Lethrinus</i> [BOLD:AAC1521]     | BOLD:AAC1521** | 18         | 356                | 29                    |
|                   |                  | <i>Lethrinus</i> [BOLD:ABZ0131]     | BOLD:ABZ0131   | 6          | 56                 | 8                     |
|                   |                  | <i>Lethrinus</i> [BOLD:ABY6363]     | BOLD:ABY6363** | 0          | 313                | 12                    |
|                   |                  | <i>Lethrinus mahsena</i>            | BOLD:AAB6438** | 1138       | 710                | 18                    |
|                   |                  | <i>Lethrinus obsoletus</i>          | BOLD:AAC1522** | 1          | 0                  | 1                     |
|                   |                  | <i>Lethrinus</i> sp_20HJ            |                | 0          | 10                 |                       |
|                   |                  | <i>Lethrinus</i> sp_26HJ            |                | 0          | 1                  |                       |
|                   |                  | <i>Lethrinus</i> sp_27HJ            |                | 0          | 24                 |                       |
|                   |                  | <i>Lethrinus</i> sp_29HJ            |                | 0          | 2                  |                       |
|                   |                  | <i>Lethrinus</i> sp_8HJ             |                | 0          | 161                |                       |
|                   |                  | <i>Lethrinus</i> sp3 (COLOR)        |                | 17         | 0                  |                       |
|                   |                  | <i>Lethrinus</i> sp4 (COLOR)        |                | 1          | 0                  |                       |
|                   |                  | <i>Lethrinus</i> sp5 (COLOR)        |                | 4          | 0                  |                       |
|                   |                  | <i>Lethrinus xanthochilus</i>       | BOLD:AAC1546   | 0          | 26                 | 4                     |
|                   | POLYNEMIDAE      | <i>Polydactylus malagasyensis</i>   | BOLD:AAB7311** | 1          | 0                  | 1                     |
|                   |                  | <i>Polydactylus plebeius</i>        | BOLD:AAC6244** | 2          | 0                  | 1                     |
|                   | MULLIDAE         | Mullidae [BOLD:ADN0684]             | BOLD:ADN0684*  | 0          | 5                  | 1                     |
|                   |                  | Mullidae_gen sp_2HJ                 |                | 0          | 10                 |                       |
|                   |                  | <i>Mulloidichthys flavolineatus</i> | BOLD:AAB2592   | 0          | 12                 | 2                     |
|                   |                  | <i>Parupeneus</i> [BOLD:AAB2590]    | BOLD:AAB2590** | 3          | 470                | 9                     |
|                   |                  | <i>Parupeneus</i> [BOLD:ADM7122]    | BOLD:ADM7122*  | 0          | 2                  | 2                     |
|                   |                  | <i>Parupeneus</i> [BOLD:AAB5978]    | BOLD:AAB5978   | 14         | 68                 | 5                     |

\*\* New BIN for Madagascar

\* New BIN for BOLD

**Table S2:** (continued)

| ORDER_Nelson_2006 | FAMILY_Eschmeyer | Genus species                     | BIN            | Light trap | Mosquito seine net | Successfully barcoded |
|-------------------|------------------|-----------------------------------|----------------|------------|--------------------|-----------------------|
| PERCIFORMES       | MULLIDAE         | <i>Parupeneus</i> [BOLD:AAB5980]  | BOLD:AAB5980** | 0          | 112                | 5                     |
|                   |                  | <i>Parupeneus cyclostomus</i>     | BOLD:AAD1433** | 1          | 0                  | 1                     |
|                   |                  | <i>Parupeneus fraserorum</i>      | BOLD:AAF8776** | 0          | 2                  | 2                     |
|                   |                  | <i>Parupeneus indicus</i>         | BOLD:AAB0334   | 0          | 148                | 2                     |
|                   |                  | <i>Parupeneus macronemus</i>      | BOLD:ACF0223** | 7          | 53                 | 7                     |
|                   |                  | <i>Parupeneus pleurostigma</i>    | BOLD:AAD6266   | 0          | 26                 | 3                     |
|                   |                  | <i>Parupeneus rubescens</i>       | BOLD:AAC1405** | 0          | 536                | 3                     |
|                   |                  | <i>Upeneus guttatus</i>           | BOLD:AAH7551   | 0          | 2                  | 1                     |
|                   |                  | <i>Upeneus</i> [BOLD:ACV4665]     | BOLD:ACV4665   | 0          | 1                  | 1                     |
|                   |                  | <i>Upeneus</i> [BOLD:ABZ7416]     | BOLD:ABZ7416** | 0          | 94                 | 2                     |
|                   |                  | <i>Upeneus margarethae</i>        | BOLD:AAB9714   | 0          | 35                 | 2                     |
|                   |                  | <i>Upeneus moluccensis</i>        | BOLD:AAB6469   | 0          | 1                  | 1                     |
|                   |                  | <i>Upeneus pori</i>               | BOLD:AAC1406   | 4          | 1                  | 3                     |
|                   |                  | <i>Upeneus tragula</i>            | BOLD:AAB9327** | 0          | 1                  | 1                     |
|                   | PEMPHERIDAE      | <i>Parapriacanthus ransonneti</i> | BOLD:AAC7599   | 152        | 0                  | 3                     |
|                   |                  | <i>Pempheris ibo</i>              | BOLD:AAF8820   | 17         | 0                  | 2                     |
|                   |                  | <i>Pempheris</i> [BOLD:AAD1777]   | BOLD:AAD1777** | 0          | 42                 | 1                     |
|                   | MONODACTYLIDAE   | <i>Monodactylus argenteus</i>     | BOLD:AAA9698** | 1          | 0                  | 1                     |
|                   | CORYPHAENIDAE    | <i>Coryphaena hippurus</i>        | BOLD:AAA5277   | 1          | 0                  | 1                     |
|                   | CHAETODONTIDAE   | <i>Chaetodon ulietensis</i>       | BOLD:AAC8636   | 1          | 0                  | 1                     |
|                   |                  | <i>Chaetodon auriga</i>           |                | 246        | 29                 |                       |
|                   |                  | <i>Chaetodon bennetti</i>         | BOLD:ACE8647** | 1          | 0                  | 1                     |
|                   |                  | <i>Chaetodon blackburnii</i>      | BOLD:AAE1178   | 1          | 0                  | 1                     |
|                   |                  | <i>Chaetodon dolosus</i>          |                | 0          | 1                  |                       |
|                   |                  | <i>Chaetodon falcula</i>          |                | 0          | 1                  |                       |
|                   |                  | <i>Chaetodon guttatissimus</i>    | BOLD:AAD3872** | 1          | 0                  | 1                     |
|                   |                  | <i>Chaetodon interruptus</i>      |                | 1          | 0                  |                       |
|                   |                  | <i>Chaetodon kleinii</i>          | BOLD:AAC2841** | 1          | 2                  | 2                     |
|                   |                  | <i>Chaetodon lunula</i>           |                | 9          | 1                  |                       |
|                   |                  | <i>Chaetodon melannotus</i>       | BOLD:AAC2848** | 7          | 9                  | 4                     |

\*\* New BIN for Madagascar



Table S2: (continued)

| ORDER_Nelson_2006 | FAMILY_Eschmeyer | Genus species                     | BIN            | Light trap | Mosquito seine net | Successfully barcoded |
|-------------------|------------------|-----------------------------------|----------------|------------|--------------------|-----------------------|
| PERCIFORMES       | CHAETODONTIDAE   | <i>Chaetodon trifascialis</i>     |                | 1          | 0                  |                       |
|                   |                  | <i>Chaetodon trifasciatus</i>     | BOLD:AAB7102** | 8          | 1                  | 1                     |
|                   |                  | <i>Chaetodon vagabundus</i>       | BOLD:AAB3198** | 0          | 5                  | 2                     |
|                   |                  | <i>Chaetodon xanthocephalus</i>   | BOLD:AAE1213   | 4          | 2                  | 3                     |
|                   |                  | <i>Chaetodon zanzibarensis</i>    | BOLD:AAE9260** | 2          | 0                  | 1                     |
|                   |                  | <i>Heniochus acuminatus</i>       | BOLD:AAB5716** | 0          | 6                  | 2                     |
|                   |                  | <i>Heniochus diphreutes</i>       | BOLD:AAB5717   | 0          | 1                  | 1                     |
|                   | POMACANTHIDAE    | <i>Centropyge multispinis</i>     | BOLD:AAD3135** | 2          | 0                  | 1                     |
|                   |                  | <i>Pomacanthus semicirculatus</i> | BOLD:ACK8181** | 23         | 0                  | 2                     |
|                   | TERAPONTIDAE     | <i>Pelates quadrilineatus</i>     | BOLD:AAA9700   | 0          | 6                  | 1                     |
|                   |                  | <i>Terapon</i> [BOLD:ACV8977]     | BOLD:ACV8977   | 33         | 0                  | 1                     |
|                   | POMACENTRIDAE    | <i>Abudefduf</i> [BOLD:ACK8109]   | BOLD:ACK8109** | 1          | 1                  | 2                     |
|                   |                  | <i>Abudefduf sexfasciatus</i>     |                | 0          | 1                  |                       |
|                   |                  | <i>Abudefduf sparoides</i>        |                | 1          | 0                  |                       |
|                   |                  | <i>Abudefduf vaigiensis</i>       |                | 20         | 0                  |                       |
|                   |                  | <i>Amblyglyphidodon indicus</i>   | BOLD:ACF1984** | 4          | 0                  | 1                     |
|                   |                  | <i>Amphiprion allardi</i>         | BOLD:AAC4980   | 0          | 2                  | 1                     |
|                   |                  | <i>Chromis atripectoralis</i>     | BOLD:AAB9018** | 1          | 0                  | 1                     |
|                   |                  | <i>Chromis</i> [BOLD:ACF0042]     | BOLD:ACF0042** | 2          | 9                  | 2                     |
|                   |                  | <i>Chromis fieldi</i>             | BOLD:AAC0458** | 1          | 0                  | 1                     |
|                   |                  | <i>Chromis nigrura</i>            | BOLD:AAD5022** | 1          | 0                  | 1                     |
|                   |                  | <i>Chromis ternatensis</i>        | BOLD:AAC6972   | 2          | 0                  | 1                     |
|                   |                  | <i>Chromis viridis</i>            | BOLD:AAB4985** | 377        | 0                  | 6                     |
|                   |                  | <i>Chromis weberi</i>             |                | 15         | 0                  |                       |
|                   |                  | <i>Chrysiptera annulata</i>       | BOLD:AAF2723** | 100        | 134                | 7                     |
|                   |                  | <i>Chrysiptera brownriggii</i>    | BOLD:AAB6234** | 3          | 0                  | 1                     |
|                   |                  | <i>Dascyllus abudafur</i>         | BOLD:AAB4091** | 14         | 19                 | 5                     |
|                   |                  | <i>Dascyllus carneus</i>          | BOLD:AAD7114   | 3          | 0                  | 3                     |
|                   |                  | <i>Dascyllus trimaculatus</i>     | BOLD:AAB2685** | 296        | 33                 | 10                    |

\*\* New BIN for Madagascar

**Table S2:** (continued)

| ORDER_Nelson_2006 | FAMILY_Eschmeyer | Genus species                            | BIN            | Light trap | Mosquito seine net | Successfully barcoded |
|-------------------|------------------|------------------------------------------|----------------|------------|--------------------|-----------------------|
| PERCIFORMES       | POMACENTRIDAE    | <i>Neopomacentrus sororius</i>           | BOLD:AAC8318** | 10         | 0                  | 4                     |
|                   |                  | <i>Neopomacentrus</i> [BOLD:AAI3160]     | BOLD:AAI3160   | 0          | 79                 | 5                     |
|                   |                  | <i>Plectroglyphidodon</i> [BOLD:AAB6988] | BOLD:AAB6988** | 45         | 0                  | 6                     |
|                   |                  | <i>Plectroglyphidodon dickii</i>         |                | 19         | 0                  |                       |
|                   |                  | <i>Pomacentrus agassizii</i>             |                | 7          | 0                  |                       |
|                   |                  | <i>Pomacentrus</i> [BOLD:AAB9539]        | BOLD:AAB9539** | 8          | 0                  | 4                     |
|                   |                  | <i>Pomacentrus sulfureus</i>             | BOLD:AAD2952** | 2          | 0                  | 1                     |
|                   |                  | <i>Pomacentrus trilineatus</i>           | BOLD:AAY3550** | 574        | 71                 | 25                    |
|                   | LABRIDAE         | <i>Cheilinus</i> [BOLD:AAB4186]          | BOLD:AAB4186   | 1          | 70                 | 2                     |
|                   |                  | <i>Cheilio</i> [BOLD:AAA6101]            | BOLD:AAA6101** | 0          | 586                | 1                     |
|                   |                  | <i>Coris caudimacula</i>                 | BOLD:AAC2101** | 0          | 2                  | 1                     |
|                   |                  | <i>Cymolutes</i> [BOLD:ADM8951]          | BOLD:ADM8951   | 0          | 1                  | 1                     |
|                   |                  | <i>Cymolutes praetextatus</i>            | BOLD:AAF7751   | 0          | 147                | 5                     |
|                   |                  | <i>Cymolutes torquatus</i>               | BOLD:AAI9445   | 0          | 404                | 3                     |
|                   |                  | <i>Epibulus insidiator</i>               | BOLD:AAB8858** | 1          | 0                  | 1                     |
|                   |                  | <i>Halichoeres</i> [BOLD:AAC7896]        | BOLD:AAC7896   | 0          | 18                 | 1                     |
|                   |                  | <i>Halichoeres</i> [BOLD:AAF7654]        | BOLD:AAF7654   | 0          | 2                  | 2                     |
|                   |                  | <i>Halichoeres scapularis</i>            | BOLD:AAC0139** | 0          | 110                | 1                     |
|                   |                  | Labridae [BOLD:ADI3805]                  | BOLD:ADI3805*  | 0          | 3                  | 3                     |
|                   |                  | Labridae [BOLD:ACT0048]                  | BOLD:ACT0048   | 0          | 1                  | 1                     |
|                   |                  | <i>Pteragogus</i> [BOLD:ADI3844]         | BOLD:ADI3844   | 0          | 1                  | 1                     |
|                   |                  | <i>Novaculoides macrolepidotus</i>       | BOLD:AAD8577   | 0          | 149                | 11                    |
|                   |                  | <i>Oxycheilinus</i> [BOLD:AAC3195]       | BOLD:AAC3195   | 0          | 345                | 17                    |
|                   |                  | <i>Pteragogus</i> [BOLD:AAV2736]         | BOLD:AAV2736** | 0          | 1                  | 1                     |
|                   |                  | <i>Pteragogus</i> [BOLD:AAZ4093]         | BOLD:AAZ4093   | 0          | 214                | 5                     |
|                   |                  | <i>Stethojulis</i> [BOLD:AAD4824]        | BOLD:AAD4824** | 3          | 6                  | 4                     |
|                   |                  | <i>Stethojulis strigiventer</i>          | BOLD:AAE2186** | 0          | 2                  | 2                     |
|                   |                  | <i>Stethojulis</i> [BOLD:ADI2646]        | BOLD:ADI2646*  | 3          | 13125              | 1                     |

\*\* New BIN for Madagascar

**Table S2:** (continued)

| ORDER_Nelson_2006 | FAMILY_Eschmeyer | Genus species                        | BIN            | Light trap | Mosquito seine net | Successfully barcoded |
|-------------------|------------------|--------------------------------------|----------------|------------|--------------------|-----------------------|
| PERCIFORMES       | LABRIDAE         | <i>Stethojulis interrupta</i>        | BOLD:AAC2336** | 0          | 403                | 4                     |
|                   |                  | <i>Thalassoma lunare</i>             | BOLD:AAB0673** | 0          | 1                  | 1                     |
|                   | SCARIDAE         | <i>Calotomus spinidens</i>           | BOLD:AAD4765   | 2          | 3120               | 18                    |
|                   |                  | Scaridae [BOLD:ABW6983]              | BOLD:ABW6983   | 0          | 1                  | 1                     |
|                   |                  | Scaridae [BOLD:ADI3252]              | BOLD:ADI3252*  | 0          | 8                  | 1                     |
|                   |                  | Scaridae_gen sp_10HJ                 |                | 0          | 1                  |                       |
|                   |                  | Scaridae_gen sp_11HJ                 |                | 0          | 1                  |                       |
|                   |                  | Scaridae_gen sp_12HJ                 |                | 0          | 6                  |                       |
|                   |                  | <i>Scarus fuscopurpureus</i>         | BOLD:AAD0849   | 0          | 2683               | 12                    |
|                   |                  | <i>Scarus</i> [BOLD:ABY4451]         | BOLD:ABY4451   | 1          | 1036               | 5                     |
|                   |                  | <i>Scarus psittacus</i>              | BOLD:AAB8901   | 0          | 19                 | 3                     |
|                   | TRIPTERYGIIDAE   | <i>Enneapterygius</i> [BOLD:AAT9889] | BOLD:AAT9889** | 2          | 0                  | 1                     |
|                   |                  | <i>Enneapterygius</i> [BOLD:ACV9383] | BOLD:ACV9383   | 20         | 0                  | 1                     |
|                   |                  | Tripterygiidae sp1 (COLOR)           |                | 2          | 0                  |                       |
|                   | BLENNIIDAE       | <i>Aspidontus dussumieri</i>         |                | 1          | 0                  |                       |
|                   |                  | <i>Aspidontus</i> sp_1HJ             |                | 0          | 1                  |                       |
|                   |                  | <i>Aspidontus tractus</i>            |                | 2          | 0                  |                       |
|                   |                  | <i>Omobranchus</i> [BOLD:ACY8418]    | BOLD:ACY8418*  | 1          | 0                  | 1                     |
|                   |                  | <i>Petroscirtes</i> [BOLD:AAE6132]   | BOLD:AAE6132   | 0          | 1                  | 1                     |
|                   |                  | <i>Petroscirtes</i> [BOLD:AAE6131]   | BOLD:AAE6131** | 304        | 3191               | 7                     |
|                   |                  | <i>Plagiotremus rhinorhynchus</i>    |                | 1          | 0                  |                       |
|                   |                  | <i>Plagiotremus tapeinosoma</i>      | BOLD:AAD0784** | 0          | 7                  | 2                     |
|                   |                  | <i>Salarias</i> [BOLD:ACV7965]       | BOLD:ACV7965   | 31         | 0                  | 4                     |
|                   |                  | <i>Salarias</i> [BOLD:ADN2100]       | BOLD:ADN2100   | 1          | 0                  | 1                     |
|                   | CALLIONYMIDAE    | <i>Callionymus filamentosus</i>      | BOLD:ACZ1215   | 2          | 0                  | 1                     |
|                   |                  | <i>Diplogrammus infulatus</i>        | BOLD:AAN1422   | 0          | 239                | 1                     |
|                   | ELEOTRIDAE       | <i>Eleotris</i> [BOLD:ACV7471]       | BOLD:ACV7471   | 1          | 0                  | 1                     |
|                   | GOBIIDAE         | <i>Amblygobius</i> [BOLD:AAB8727]    | BOLD:AAB8727   | 0          | 148                | 2                     |
|                   |                  | <i>Amblygobius sphynx</i>            | BOLD:AAJ2321   | 0          | 573                | 1                     |
|                   |                  | <i>Asterropteryx</i> [BOLD:AAC0108]  | BOLD:AAC0108   | 6          | 31                 | 5                     |

\*\* New BIN for Madagascar

Table S2: (continued)

| ORDER_Nelson_2006 | FAMILY_Eschmeyer | Genus species                        | BIN            | Light trap | Mosquito seine net | Successfully barcoded |
|-------------------|------------------|--------------------------------------|----------------|------------|--------------------|-----------------------|
| PERCIFORMES       | GOBIIDAE         | <i>Bathygobius</i> [BOLD:AAL7906]    | BOLD:AAL7906   | 1          | 0                  | 1                     |
|                   |                  | <i>Gnatholepis</i> [BOLD:AAI5395]    | BOLD:AAI5395   | 11         | 1677               | 3                     |
|                   |                  | Gobiidae [BOLD:ACV9382]              | BOLD:ACV9382*  | 18         | 0                  | 2                     |
|                   |                  | Gobiidae [BOLD:ADM7236]              | BOLD:ADM7236   | 0          | 8                  | 1                     |
|                   |                  | Gobiidae [BOLD:ADM8879]              | BOLD:ADM8879   | 0          | 3                  | 1                     |
|                   |                  | Gobiidae sp3 (COLOR)                 |                | 1          | 0                  |                       |
|                   |                  | Gobiidae sp4 (COLOR)                 |                | 1          | 0                  |                       |
|                   |                  | Gobiidae sp5 (COLOR)                 |                | 4          | 0                  |                       |
|                   |                  | <i>Oplopomus</i> [BOLD:AAI3352]      | BOLD:AAI3352   | 0          | 4538               | 5                     |
|                   |                  | <i>Valenciennea</i> [BOLD:AAC4124]   | BOLD:AAC4124   | 1          | 0                  | 1                     |
|                   |                  | <i>Valenciennea helsdingenii</i>     | BOLD:AAD4704** | 0          | 1                  | 1                     |
|                   |                  | <i>Valenciennea sexguttata</i>       | BOLD:AAC5611   | 0          | 3                  | 3                     |
|                   |                  | <i>Vanderhorstia</i> [BOLD:AAF0288]  | BOLD:AAF0288   | 0          | 7                  | 1                     |
|                   | MICRODESMIDAE    | <i>Gunnellichthys</i> [BOLD:ADM8209] | BOLD:ADM8209*  | 0          | 1                  | 1                     |
|                   |                  | <i>Ptereleotris evides</i>           | BOLD:AAD9105** | 1          | 0                  | 1                     |
|                   | EPHIPPIDAE       | <i>Platax orbicularis</i>            | BOLD:AAC6496   | 0          | 3                  | 2                     |
|                   |                  | <i>Platax teira</i>                  | BOLD:AAC5812   | 0          | 2                  | 1                     |
|                   | SIGANIDAE        | <i>Siganus argenteus</i>             | BOLD:AAC6461   | 1          | 7                  | 2                     |
|                   |                  | <i>Siganus laqueus</i>               | BOLD:AAB2341** | 0          | 42                 | 3                     |
|                   |                  | <i>Siganus sutor</i>                 | BOLD:AAB6556** | 519        | 14502              | 2                     |
|                   | ZANCLIDAE        | <i>Zanclus cornutus</i>              |                | 0          | 18                 |                       |
|                   | ACANTHURIDAE     | <i>Acanthurus blochii</i>            | BOLD:AAF0623   | 7          | 0                  | 1                     |
|                   |                  | <i>Acanthurus dussumieri</i>         | BOLD:AAE4046   | 45         | 62                 | 20                    |
|                   |                  | <i>Acanthurus mata</i>               | BOLD:AAE4025   | 4          | 366                | 2                     |
|                   |                  | <i>Acanthurus nigricauda</i>         | BOLD:AAB8729   | 22         | 107                | 12                    |
|                   |                  | <i>Acanthurus nigrofuscus</i>        |                | 1          | 0                  |                       |
|                   |                  | <i>Acanthurus</i> sp_1HJ             |                | 3          | 0                  |                       |
|                   |                  | <i>Acanthurus triostegus</i>         | BOLD:AAA9362** | 52         | 1                  | 5                     |
|                   |                  | <i>Acanthurus xanthopterus</i>       | BOLD:AAC6467** | 41         | 5                  | 13                    |

\* New BIN for BOLD

\*\* New BIN for Madagascar

**Table S2:** (continued)

| ORDER_Nelson_2006            | FAMILY_Eschmeyer | Genus species                        | BIN            | Light trap | Mosquito seine net | Successfully barcoded |
|------------------------------|------------------|--------------------------------------|----------------|------------|--------------------|-----------------------|
| PERCIFORMES                  | ACANTHURIDAE     | <i>Ctenochaetus binotatus</i>        | BOLD:AAB9166   | 1          | 0                  | 1                     |
|                              |                  | <i>Ctenochaetus striatus</i>         | BOLD:AAB9167** | 3          | 0                  | 1                     |
|                              |                  | <i>Naso annulatus</i>                | BOLD:AAD4666   | 0          | 1                  | 1                     |
|                              |                  | <i>Naso brevirostris</i>             | BOLD:AAC1635   | 11         | 640                | 7                     |
|                              |                  | <i>Naso</i> sp_1HJ                   |                | 2          | 0                  |                       |
|                              |                  | <i>Zebrasoma</i> [BOLD:AAF6311]      | BOLD:AAF6311   | 14         | 3                  | 1                     |
|                              |                  | <i>Zebrasoma scopas</i>              | BOLD:AAB3788** | 1          | 0                  | 1                     |
|                              | NOMEIDAE         | <i>Psenes cyanophrys</i>             | BOLD:AAE0701   | 1          | 0                  | 1                     |
|                              | SPHYRAENIDAE     | <i>Sphyraena</i> [BOLD:AAD0400]      | BOLD:AAD0400   | 3          | 0                  | 2                     |
|                              |                  | <i>Sphyraena</i> [BOLD:ACV9716]      | BOLD:ACV9716*  | 3          | 1540               | 4                     |
|                              |                  | <i>Sphyraena barracuda</i>           | BOLD:AAA6100   | 33         | 0                  | 3                     |
|                              |                  | <i>Sphyraena</i> [BOLD:AAF8900]      | BOLD:AAF8900** | 0          | 10                 | 2                     |
| PLEURONECTIFORMES BOTHIDAE   |                  | Bothidae [BOLD:ADI1616]              | BOLD:ADI1616*  | 0          | 65                 | 2                     |
|                              |                  | Bothidae [BOLD:ADM7915]              | BOLD:ADM7915   | 0          | 2                  | 1                     |
|                              |                  | Bothidae sp2 (COLOR)                 |                | 1          | 0                  |                       |
|                              |                  | <i>Bothus pantherinus</i>            | BOLD:AAC9155** | 20         | 75                 | 6                     |
|                              |                  | <i>Crossorhombus valderostratus</i>  | BOLD:AAF8808** | 1          | 0                  | 1                     |
| TETRAODONTIFORMES BALISTIDAE |                  | <i>Balistoides viridescens</i>       | BOLD:AAD0474   | 6          | 7                  | 3                     |
|                              |                  | <i>Pseudobalistes fuscus</i>         | BOLD:ACZ6203   | 4          | 0                  | 4                     |
|                              |                  | <i>Rhinecanthus aculeatus</i>        | BOLD:AAB6992** | 0          | 2                  | 1                     |
|                              |                  | <i>Sufflamen chrysopteron</i>        | BOLD:AAB1339** | 5          | 0                  | 1                     |
|                              | MONACANTHIDAE    | <i>Cantherhines pardalis</i>         | BOLD:AAB9564** | 3          | 0                  | 2                     |
|                              |                  | <i>Paramonacanthus barnardi</i>      |                | 1          | 0                  |                       |
|                              |                  | <i>Paramonacanthus frenatus</i>      | BOLD:AAI6357   | 0          | 200                | 10                    |
|                              |                  | <i>Paramonacanthus pusillus</i>      | BOLD:AAV6227   | 44         | 9                  | 1                     |
|                              |                  | <i>Pervagor janthinosoma</i>         | BOLD:AAD6159   | 5          | 0                  | 1                     |
|                              |                  | <i>Pseudalutarius</i> [BOLD:AAI4531] | BOLD:AAI4531   | 4          | 17                 | 4                     |
|                              |                  |                                      |                |            |                    |                       |
|                              | OSTRACIIDAE      | <i>Lactoria</i> [BOLD:AAF2668]       | BOLD:AAF2668   | 1          | 63                 | 2                     |
|                              |                  | <i>Lactoria cornuta</i>              | BOLD:AAB2988   | 11         | 161                | 5                     |

\* New BIN for BOLD

\*\* New BIN for Madagascar

**Table S2:** (continued)

| ORDER_Nelson_2006  | FAMILY_Eschmeyer   | Genus species                      | BIN            | Light trap | Mosquito seine net | Successfully barcoded |
|--------------------|--------------------|------------------------------------|----------------|------------|--------------------|-----------------------|
| TETRAODONTIFORMES  | OSTRACIIDAE        | <i>Ostracion cubicus</i>           | BOLD:AAC2246** | 2          | 14                 | 4                     |
|                    | TETRAODONTIDAE     | <i>Arothron hispidus</i>           | BOLD:AAB9202** | 34         | 16                 | 9                     |
|                    |                    | <i>Arothron immaculatus</i>        | BOLD:AAD2857   | 2          | 0                  | 2                     |
|                    |                    | <i>Arothron stellatus</i>          |                | 0          | 2                  |                       |
|                    |                    | <i>Canthigaster xanthinoptera</i>  | BOLD:ACC1190** | 2          | 0                  | 2                     |
|                    |                    | <i>Canthigaster bennetti</i>       | BOLD:AAC6218** | 5          | 0                  | 2                     |
|                    |                    | <i>Canthigaster petersii</i>       | BOLD:AAD2222** | 7          | 54                 | 3                     |
|                    |                    | <i>Canthigaster valentini</i>      |                | 2          | 0                  |                       |
|                    |                    | <i>Lagocephalus</i> [BOLD:AAC5565] | BOLD:AAC5565   | 0          | 1                  | 1                     |
|                    |                    | Tetraodontidae sp2 (COLOR)         |                | 1          | 0                  |                       |
|                    |                    | <i>Torquigener flavimaculosus</i>  | BOLD:AAG3690   | 7          | 2                  | 2                     |
| ACTINOPTERYGII_ord | ACTINOPTERYGII_fam | Actinopterygii [BOLD:ADN1799]      | BOLD:ADN1799*  | 2          | 0                  | 2                     |

\*\* New BIN for Madagascar

\* New BIN for BOLD
